# Supplementary material for: Impact of the COVID-19 pandemic on the cost of chronic diseases treatment and care at public hospitals in Wallaga zones, Oromia Regional State, Ethiopia: a hospital-based, cross-sectional study
Source: PubMed Central journal article supplement — BMJ Open. 2023 Nov 6;13(11):e070195. doi: 10.1136/bmjopen-2022-070195 (PMC10632867; doi:10.1136/bmjopen-2022-070195), 2023-11-06
Supplement: bmjopen-2022-070195.draft_revisions.pdf [file bmjopen-2022-070195.draft_revisions.pdf]

# BMJ Open

BMJ Open is committed to open peer review. As part of this commitment we make the peer review history of every article we publish publicly available.

When an article is published we post the peer reviewers' comments and the authors' responses online. We also post the versions of the paper that were used during peer review. These are the versions that the peer review comments apply to.

The versions of the paper that follow are the versions that were submitted during the peer review process. They are not the versions of record or the final published versions. They should not be cited or distributed as the published version of this manuscript.

BMJ Open is an open access journal and the full, final, typeset and author-corrected version of record of the manuscript is available on our site with no access controls, subscription charges or pay-per-view fees (<http://bmjopen.bmj.com>).

If you have any questions on BMJ Open's open peer review process please email [info.bmjopen@bmj.com](mailto:info.bmjopen@bmj.com)

# BMJ Open

## Impact of COVID-19 Pandemic on Cost of Chronic Diseases Treatment and Care at Public Hospitals in Wallaga Zones, Oromia Regional State, Ethiopia: Hospital Based Cross-Sectional Study

|                               |                                                                                                                                                                                                                                                                                                                                                                                                                                                                                                                                                                                                                                                                                                                                                                                                                                     |
|-------------------------------|-------------------------------------------------------------------------------------------------------------------------------------------------------------------------------------------------------------------------------------------------------------------------------------------------------------------------------------------------------------------------------------------------------------------------------------------------------------------------------------------------------------------------------------------------------------------------------------------------------------------------------------------------------------------------------------------------------------------------------------------------------------------------------------------------------------------------------------|
| Journal:                      | <i>BMJ Open</i>                                                                                                                                                                                                                                                                                                                                                                                                                                                                                                                                                                                                                                                                                                                                                                                                                     |
| Manuscript ID                 | bmjopen-2022-070195                                                                                                                                                                                                                                                                                                                                                                                                                                                                                                                                                                                                                                                                                                                                                                                                                 |
| Article Type:                 | Original research                                                                                                                                                                                                                                                                                                                                                                                                                                                                                                                                                                                                                                                                                                                                                                                                                   |
| Date Submitted by the Author: | 16-Nov-2022                                                                                                                                                                                                                                                                                                                                                                                                                                                                                                                                                                                                                                                                                                                                                                                                                         |
| Complete List of Authors:     | Terefa, Dufera; Wallaga University, Public Health<br>Tesfaye, Edosa; Wallaga University, Department of Public Health<br>Tolessa, Belachew; Wallaga University, Department of Public Health, Institute of Health Sciences<br>Ewunetu, Adisu ; Wallaga University, Public Health<br>Olani, Wolkite ; Wallaga University, Public Health<br>Fetensa, Getahun; Wallaga University, Department of Nursing<br>Chego, Melese ; Wallaga University, Public Health<br>Abdisa, Eba ; Wallaga University, School of Nursing<br>Turi, Ebisa; Wallaga University, Department of Public Health<br>Bekuma, Tariku Tesfaye; Wallaga University, Department of Public health<br>Getachew, Motuma; Wallaga University, Public Health<br>Tefaye, Lensa ; Wallaga University, Public Health<br>Tilahun, Temesgen; Wallaga University, School of Medicine |
| Keywords:                     | EPIDEMIOLOGY, Health economics < HEALTH SERVICES ADMINISTRATION & MANAGEMENT, Health policy < HEALTH SERVICES ADMINISTRATION & MANAGEMENT                                                                                                                                                                                                                                                                                                                                                                                                                                                                                                                                                                                                                                                                                           |
|                               |                                                                                                                                                                                                                                                                                                                                                                                                                                                                                                                                                                                                                                                                                                                                                                                                                                     |

SCHOLARONE™  
Manuscripts

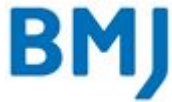

I, the Submitting Author has the right to grant and does grant on behalf of all authors of the Work (as defined in the below author licence), an exclusive licence and/or a non-exclusive licence for contributions from authors who are: i) UK Crown employees; ii) where BMJ has agreed a CC-BY licence shall apply, and/or iii) in accordance with the terms applicable for US Federal Government officers or employees acting as part of their official duties; on a worldwide, perpetual, irrevocable, royalty-free basis to BMJ Publishing Group Ltd ("BMJ") its licensees and where the relevant Journal is co-owned by BMJ to the co-owners of the Journal, to publish the Work in this journal and any other BMJ products and to exploit all rights, as set out in our [licence](#).

The Submitting Author accepts and understands that any supply made under these terms is made by BMJ to the Submitting Author unless you are acting as an employee on behalf of your employer or a postgraduate student of an affiliated institution which is paying any applicable article publishing charge ("APC") for Open Access articles. Where the Submitting Author wishes to make the Work available on an Open Access basis (and intends to pay the relevant APC), the terms of reuse of such Open Access shall be governed by a Creative Commons licence – details of these licences and which [Creative Commons](#) licence will apply to this Work are set out in our licence referred to above.

Other than as permitted in any relevant BMJ Author's Self Archiving Policies, I confirm this Work has not been accepted for publication elsewhere, is not being considered for publication elsewhere and does not duplicate material already published. I confirm all authors consent to publication of this Work and authorise the granting of this licence.

1  
2  
3 **1 Impact of COVID-19 Pandemic on Cost of Chronic Diseases Treatment and**  
4  
5 **2 Care at Public Hospitals in Wallaga Zones, Oromia Regional State, Ethiopia:**  
6  
7 **3 Hospital Based Cross-Sectional Study**  
8  
9

10 Dufera Rikitu Terefa <sup>1</sup>, Edosa Tesfaye <sup>1</sup>, Belachew Etana <sup>1</sup>, Adisu Ewunetu <sup>1</sup>, Wolkite  
11 Olani <sup>1</sup>, Getahun Fetensa <sup>2</sup>, Melese Chego <sup>1</sup>, Eba Abdisa <sup>2</sup>, Ebisa Turi <sup>1</sup>, Tariku  
12 Tesfaye <sup>1</sup>, Motuma Getachew <sup>1</sup>, Lensa Tesfaye <sup>1</sup>, Temesgen Tilahun <sup>3</sup>  
13  
14

15 <sup>1</sup> Department of Public Health, Institute of Health Sciences, Wallaga University,  
16 Nekemte, Ethiopia  
17

18 <sup>2</sup> School of Nursing, Institute of Health Sciences, Wallaga University, Nekemte,  
19 Ethiopia  
20  
21

22 <sup>3</sup> School of Medicine, Institute of Health Sciences, Wallaga University, Nekemte,  
23 Ethiopia  
24

25 Co-author contact details:

26 Edosa Tesfaye, E-mail: edosatesfaye2019@yahoo.com  
27

28 Belachew Etana, E-mail: ba.etana@gmail.com  
29

30 Adisu Ewunetu, E-mail: adisuewunetu2019@gmail.com  
31

32 Wolkite Olani, E-mail: walkiteolani2020@gmail.com  
33

34 Getahun Fetensa, E-mail: fetensagetahun@gmail.com  
35

36 Melese Chego, E-mail: melese\_chego@yahoo.com  
37

38 Eba Abdisa, E-mail: ebaabdisa@rocketmail.com  
39

40 Ebisa Turi, E-mail: ebakoturi@gmail.com  
41

42 Tariku Tesfaye, E-mail: tarii2007@gmail.com  
43

44 Motuma Getachew, E-mail: motyamo@gmail.com  
45

46 Lensa Tesfaye, E-mail: lenlove539@gmail.com  
47

48 Temesgen Tilahun, E-mail: ttamuko@yahoo.com  
49

50 Corresponding author contact details:  
51

52 Full name: Dufera Rikitu Terefa  
53

54 P.O.Box=395, Wallaga University, Nekemte, Ethiopia.  
55

56 Tel. (+251)-922260706  
57  
58  
59  
60

1  
2  
3 30 E-mail:duferarikitu24@gmail.com  
4

5 31 **Abstract**

6 32 **Objective:** Aimed to determine the impact of COVID-19 pandemic on cost of chronic  
7  
8 33 diseases treatment and care at public hospitals in Wallaga Zones, Oromia Regional  
9  
10 34 State, Ethiopia, from August 01 to 31, 2020.

11  
12  
13 35 **Methods:** An institutional based cross-sectional study design was used and the  
14  
15 36 sample size for the study (n = 642) was determined using a single population mean  
16  
17 37 formula. Data was collected using interviews and analyzed using SPSS version 25.  
18  
19 38 Descriptive statistics were performed and the cost of follow-up care before and after  
20  
21 39 the pandemic was compared using a Related-samples Wilcoxon signed-rank test,  
22  
23 40 declaring the level of significance of the median cost difference at  $P < 0.05$ .

24  
25  
26  
27  
28 41 **Results:** A total of 642 patients were included in the study, among whom 605 (94.2%)  
29  
30 42 of them responded to the interviews. There was a significant median cost difference (n  
31  
32 43 = 593,  $Z = 5.05$ ,  $p = 0.001$ ) between the cost of chronic diseases among follow-up  
33  
34 44 patients during the pandemic compared to the costs incurred by these patients before  
35  
36 45 the pandemic.

37  
38  
39  
40 46 **Conclusion:** The cost of follow-up care among chronic disease patients during the  
41  
42 47 COVID-19 pandemic was significantly higher compared to before the pandemic era.  
43  
44 48 Therefore, healthcare providers should arrange special fee waiver mechanisms for  
45  
46 49 chronic disease healthcare costs during such types of pandemics and provide the  
47  
48 50 services at proximal health facilities.

49  
50  
51 51 **Keywords:** COVID-19 Pandemic, Chronic Disease, Cost of Illness, Follow up Care,  
52  
53  
54  
55 52 Ethiopia  
56  
57  
58  
59  
60

## 53 **Background**

54 Globally, chronic diseases (CDs) are major public health problems that account for  
55 60% of all deaths and are the cause of 35% of deaths in low and 40% of deaths  
56 occurring in middle income countries.<sup>1-3</sup> Many low- and middle-income countries  
57 (LMICs) are undergoing a gradual epidemiologic transition as the disease burden shifts  
58 from infectious to non-communicable diseases .<sup>4-6</sup>

59 Healthcare systems in LMICs are mostly unprepared to handle the increasing burden  
60 of non-communicable diseases (NCDs), resulting in no or limited access to affordable  
61 prevention and diagnosis of NCDs.<sup>7</sup> These add up to higher NCD treatment costs, the  
62 financing of which mostly comes from households' out-of-pocket (OOP) spending .<sup>8</sup>

63 COVID-19 originated first in China, in Wuhan, Hubei province, in late December 2019,  
64 as a health crisis that struck the global community, causing dismal repercussions.

65 SARS-CoV-2 has spread fast all over the world to involve over 200 countries, making it  
66 a pandemic. The World Health Organization (WHO) notified COVID-19 as a pandemic  
67 on March 12, 2020. <sup>9, 10</sup>

68 The COVID-19 pandemic disrupts entire societies, including the routine health care  
69 systems. The comprehensive effort to contain the pandemic and minimize the  
70 subsequent morbidity and mortality has affected both the continuity and quality of care  
71 for patients with CDs.<sup>11</sup>

72 During the pandemic, most global healthcare resources are focused on COVID-19  
73 control and prevention. This resource reallocation could disrupt the continuum of care  
74 for patients with CDs. Diabetes, chronic obstructive pulmonary disease, hypertension,  
75 heart disease, asthma, cancer, and depression were the conditions reported to be  
76 most impacted by the reduction in healthcare resources due to the pandemic.<sup>12</sup>

1  
2  
3 77 Resources at all levels have shifted away from CDs management and prevention  
4  
5 78 during the outbreak, and the lock-down of many services has translated into reduced  
6  
7 79 access, a decrease in referrals, and reduced hospitalizations of patients with non-  
8  
9  
10 80 COVID-19 pathology.<sup>13</sup>  
11  
12 81 As the pandemic continues to rapidly spread, our attention often focuses on the  
13  
14 82 numbers of confirmed and probable cases, hospitalizations, and deaths, which can be  
15  
16 83 called the "direct" effects of the pandemic. However, these numbers do not capture the  
17  
18 84 full extent of the pandemic because it has also generated important spillover (indirect)  
19  
20 85 effects by decreasing the supply of and altering patient demand for non-COVID-19-  
21  
22 86 related medical care. <sup>14</sup>  
23  
24  
25 87 A lock-down, self-isolation, and social distancing are some of the measures taken by  
26  
27 88 governments of different countries aimed at decelerating the pandemic spread. The  
28  
29 89 pandemic influenced everyone around the globe, but it can cause more concerns for  
30  
31 90 people living with chronic illnesses .<sup>15</sup>  
32  
33  
34 91 Ethiopia had the first COVID-19 positive case confirmed on March 13th, 2020.<sup>16</sup> At this  
35  
36 92 time, the government declared a state of emergency, labeling the pandemic as a  
37  
38 93 national threat and launching overall preventive measures, including advising the  
39  
40 94 community to stay at home, practicing strict and frequent hand washing, and wearing a  
41  
42 95 face mask. The government also restricted the movement of its people from place to  
43  
44 96 place and laid temporary restrictions on market places, restaurants, shops, cinema  
45  
46 97 houses, religious, and cities.<sup>17</sup> During this time, the number of hospital visits dropped  
47  
48 98 sharply to utilize health services, including CD follow-up. <sup>18</sup>  
49  
50  
51 99 Many studies have revealed the direct impact of COVID-19 on health care provision  
52  
53 100 and utilization. But none of them reported the impact of the pandemic on illness costs  
54  
55 101 of chronic disease follow-up care from a patient perspective. So, the study aimed to  
56  
57  
58  
59  
60

1  
2  
3 102 determine the impact of the COVID-19 pandemic on the cost of follow-up care among  
4  
5 103 chronic disease patients at public hospitals.  
6  
7

## 8 104 **Methods and Materials**

### 9 10 105 **Study Setting**

11  
12 106 This study was conducted from August 01 to 31, 2020 in East Wallaga, West  
13  
14 107 Wallaga, and Horro Guduru Wallaga zones of Oromia National Regional State,  
15  
16 108 Ethiopia.  
17  
18

### 19 109 **Study Design and Costing Method**

20  
21 110 A cross-sectional institutional-based study design was used. The bottom-up costing  
22  
23 111 approach was used. To analyze the cost of the treatment during the follow-up visit  
24  
25 112 with respect to patient perspective and the indirect costs(income lost due to  
26  
27 113 productive time lost) that were estimated using earnings lost.<sup>19</sup>  
28  
29

30  
31 114 The time foregone and productive time lost were converted into indirect costs based  
32  
33 115 on the daily wage rate and then multiplied by the number of working days lost. The  
34  
35 116 daily wage rate for patients was estimated by dividing their monthly income by 30  
36  
37 117 days for both patients and caregivers.<sup>19</sup>  
38  
39

40 118 All costs included in the analysis were measured in terms of Ethiopian Birr (ETB) and  
41  
42 119 were converted to US\$(US dollar) during the analysis, and the average currency  
43  
44 120 exchange rate was (August 2020; 1 US\$ = 35.99 ETB).  
45  
46

### 47 121 **Study Participants**

48  
49 122 All chronic disease patients who visited public hospitals in the Wallaga Zones were  
50  
51 123 the source population, and all patients who visited the three Wallaga Zones' selected  
52  
53 124 study hospitals during the study period were the study population.  
54  
55  
56  
57  
58  
59  
60



### 125 **Inclusion and Exclusion Criteria**

126 All patients of the selected CDs in the study area who visited the study hospitals  
 127 were included in the study. Patients whose age was less than 15 years old and  
 128 without accompanying patients who were seriously ill and unable to respond to the  
 129 interviews were excluded from the study.

### 130 **Sample Size and Sampling Procedures**

131 The sample size was determined by using the single population mean formula,  
 132 applying the following assumptions: two-sided alpha error ( $\epsilon$ ) set at 0.05, 95%  
 133 confidence level, and mean cost of DM ( $\mu$ ) = 48.99 ETB, and standard deviation  
 134 (SD)= 30.89 ETB<sup>20</sup>, adding 5% non-response rate.

135 Using the formula,  $n = \frac{(z - \frac{\alpha}{2})^2 * \sigma^2}{\epsilon^2 \mu^2}$  ..... [21], n= 642.

136 Among thirteen public hospitals in the study area, data was collected from the  
 137 selected CDs of follow-up care patients from Nekemte specialized hospitals, Sire  
 138 hospital, Gida hospital, Arjo hospital, Shambu hospital, Guduru hospital, Gimbi  
 139 hospital, and Nedjo hospital.

140 The determined sample size was allocated to each study hospital proportionally  
 141 based on the proportion of each CDS patient who attended follow-up care. Wollega  
 142 University referral hospital was purposely excluded from the study, which was an  
 143 isolation and treatment center for COVID-19 during the study period, and four other  
 144 hospitals were excluded due to their low CDS patient flow.

145 A total of 642 participants were selected by using a systematic sampling method at  
 146 each study hospital. A simple random sampling technique was employed to select  
 147 the first participant from the registration book.

## 148 **Data Collection Procedures**

149 The structured questionnaire was developed in English after reviewing relevant  
150 literature, and it was translated into Afan Oromo. Data collection and supervision  
151 were carried out by eight data collectors, with four supervisors assigned. These data  
152 collectors and supervisors were trained before the pre-test and actual data collection  
153 started. The questionnaires were pre-tested in Bedele Hospital using 32(5%) of the  
154 determined sample size. It was collected by face-to-face interview. Patients who  
155 completed their chronic outpatient services and returned to leave the study hospitals  
156 were interviewed.

## 157 **Study Variables**

158 **Socio-demographic and economic characteristics, health service costs**  
159 **(non-medical costs; transportation, food, accommodation, and income**  
160 **lost, and medical costs; registration, consultation, laboratory, radiology,**  
161 **and drugs) were assessed and determined.**

## 162 **Operational Definitions**

163 **Before COVID-19:** The period before March 13, 2020, when Ethiopia had the first  
164 confirmed COVID-19 positive case.

165 **Chronic disease follow up patients:** A patient visited the study hospital for the  
166 follow-up care of one of; hypertension (HTN), diabetic's mellitus (DM), heart failure  
167 (HF), mental illness, HIV (Human immune virus), stroke, epilepsy, and asthma.

168 **Chronic disease:** Any of the following illnesses that persist over time, can gradually  
169 progress, do not resolve spontaneously, and may not be cured, like HTN, DM. HF,  
170 mental illness, HIV, stroke, epilepsy, and asthma.

1  
2  
3 171 **Direct costs:** The expenditures in ETB spent by chronic disease patients and their  
4  
5 172 families on the diagnosis and treatment of chronic illness per prescription of  
6  
7  
8 173 physicians in the study hospitals.

9  
10 174 **During COVID-19:** The period after March 13, 2020, when Ethiopia had the first  
11  
12 175 confirmed COVID-19 positive case.

13  
14 176 Indirect costs: the number of productive days lost by patients and their families as a  
15  
16  
17 177 result of chronic illness care and treatment.

18  
19 178 Medical cost: The cost component of chronic disease patients' follow-up visits at  
20  
21 179 study hospitals that includes registration, laboratory, radiology, and drug costs.

22  
23  
24 180 **Non-medical cost:** The cost component that includes transportation, food,  
25  
26 181 accommodation, and income lost among chronic disease patients during  
27  
28  
29 182 follow-up visits at study hospitals.

### 30 31 183 **Data Management and Analysis**

32  
33 184 Data was entered in to Epi-data version 3.1 and exported to SPSS version 25  
34  
35  
36 185 software for analysis. Descriptive statistics and median were performed for all study  
37  
38 186 variables based on their characteristics. Finally, the normality distribution of  
39  
40 187 treatment cost data was checked, and it was not normally distributed. As a result,  
41  
42  
43 188 non-parametric tests were used to analyze the median cost for each cost category,  
44  
45 189 as well as a 2-paired sample Wilcoxon sign rank test to compare the costs incurred  
46  
47 190 before and during the pandemic lock-down, with the level of significance of the  
48  
49 191 median cost difference set at  $p < 0.05$ .

### 50 51 192 **Patient and Public Involvement**

52  
53  
54 193 None  
55  
56  
57  
58  
59  
60

## 194 Results

### 195 Socio-demographic Characteristics

196 A total of 642 patients were included in the study, among whom 605 responded to  
 197 the interview, making a 94.2% response rate. An almost equal number of male and  
 198 female participants participated in the study. More than half of the participants, 352  
 199 (58.2%), were from urban areas, and the majority of them, 421 (69.6%), were  
 200 married.

201 Regarding the educational status of the participants, 137 (22.6%) were illiterates who  
 202 were unable to read and write (Table 1). The average participant age was 43.29  
 203 (16.5%) years, the average monthly income was 84.32 ( $\pm 70.65$ ) US dollars, and the  
 204 average household size was 4.46 ( $\pm 3.43$ ).

205 Table 1: Socio-demographic and economic characteristics of chronic diseases  
 206 patients visited public hospitals in the three Wallaga zones, Oromia National Regional  
 207 State, Ethiopia 2020 (N= 605)

| Socio-demographic Characteristics (N= 605) |           | Frequency (n) | Percentage (%) |
|--------------------------------------------|-----------|---------------|----------------|
| Sex                                        | Male      | 302           | 49.9           |
|                                            | Female    | 303           | 50.1           |
| Residence place                            | Urban     | 352           | 58.2           |
|                                            | Rural     | 253           | 41.8           |
| Marital status                             | Single    | 130           | 21.5           |
|                                            | Married   | 421           | 69.6           |
|                                            | Separated | 7             | 1.2            |
|                                            | Divorced  | 2             | 0.3            |
|                                            | Widowed   | 45            | 7.4            |

|                    |                     |     |      |
|--------------------|---------------------|-----|------|
| Religion           | Orthodox            | 165 | 27.3 |
|                    | Muslim              | 59  | 9.8  |
|                    | Protestant          | 373 | 61.7 |
|                    | Others              | 8   | 1.3  |
| Ethnic group       | Oromo               | 552 | 91.2 |
|                    | Amhara              | 48  | 7.9  |
|                    | Gurage              | 4   | 0.7  |
|                    | Tigre               | 1   | 0.2  |
| Educational status | Illiterate          | 137 | 22.6 |
|                    | Read & Write        | 102 | 16.9 |
|                    | Grade 1-8           | 99  | 16.4 |
|                    | Grade 9-8           | 151 | 25.0 |
|                    | Diploma and above   | 116 | 19.2 |
| Employment status  | Government employee | 93  | 15.4 |
|                    | NGO* employee       | 89  | 14.7 |
|                    | Merchant            | 100 | 16.5 |
|                    | Housewife           | 114 | 18.8 |
|                    | Farmer              | 107 | 17.7 |
|                    | Others**            | 102 | 16.9 |

208 \*NGO= non-governmental organization, \*\* Daily laborer, students

### 209 **Costs of Follow up Care**

210 The total cost for the treatment of CDs before the COVID-19 pandemic among  
 211 patients who incurred any one or more types of cost was on average 10.70(±10.50)  
 212 US dollars, with the median cost of 8.04 US dollars among 600 patients before the  
 213 pandemic. The total cost of the treatment of the diseases per follow-up visit during

1  
2  
3 214 the pandemic among 597 patients was 13.40( $\pm$ 11.54) US dollars and the median cost  
4  
5 215 was 10.41 US dollars.  
6

7  
8 216 The median income lost due to productivity time lost for the treatment of CDs before  
9  
10 217 the pandemic was 1.48 US dollars among 501 participants who had income, which  
11  
12 218 was almost similar to the income lost when visiting the study hospitals during the  
13  
14 219 pandemic, which was 1.40 US dollars.  
15

16  
17 220 The total median non-medical cost incurred for the follow-up care was 2.57 US  
18  
19 221 dollars before the pandemic among 463 patients and 5.49 US dollars among the  
20  
21 222 same number of patients during the pandemic.  
22

23  
24 223 The total median transportation cost to travel to hospitals and travel back to their  
25  
26 224 homes, the participants incurred 1.14 US dollars before the pandemic and 2.29 US  
27  
28 225 dollars during the pandemic among 430 patients who paid for transportation.  
29

30  
31 226 The total median cost incurred for the accommodation and food during the follow-up  
32  
33 227 visit was 3.43 US dollars before the pandemic and 4.29 US dollars during the  
34  
35 228 pandemic among 199 participants.  
36

37  
38 229 The total median medical cost was 3.71 US dollars before the pandemic, whereas it  
39  
40 230 was 4.29 US dollars during the pandemic hospital visit among 425 participants who  
41  
42 231 paid for the prescribed drugs (Table 2).  
43

44  
45 232  
46

47  
48 233  
49

50  
51 234  
52

53  
54 235  
55  
56  
57  
58  
59  
60

236 Table 2: Chronic diseases follow-up treatment and care cost categories among  
 237 chronic diseases patients at public hospitals in the three Wallaga zones, Oromia  
 238 National Regional state, Ethiopia 2020(N= 605)

| Cost Categories                           | Era of COVID-19 Pandemic | Observation (N) | Median (US\$) | Significance level of median cost difference (During- Before covid-19) |
|-------------------------------------------|--------------------------|-----------------|---------------|------------------------------------------------------------------------|
| (a) Income lost                           | Before                   | 501             | 1.48          | Z = 1.780, p = 0.075                                                   |
|                                           | During                   | 501             | 1.40          |                                                                        |
| (b) Transportation                        | Before                   | 430             | 1.14          | Z = 8.028, p = 0.001                                                   |
|                                           | During                   | 430             | 2.29          |                                                                        |
| Food and accommodation c                  | Before                   | 199             | 3.43          | Z = 1.189, p = 0.169                                                   |
|                                           | During                   | 199             | 4.29          |                                                                        |
| Total nonmedical cost<br>(a+b+c) = (d)    | Before                   | 463             | 2.57          | Z = 4.903, p = 0.001                                                   |
|                                           | During                   | 463             | 5.49          |                                                                        |
| (e) Total medical cost                    | Before                   | 425             | 3.71          | Z = 2.382, p = 0.017                                                   |
|                                           | During                   | 425             | 4.29          |                                                                        |
| Total cost per patient per visit<br>(d+e) | Before                   | 600             | 8.04          | Z = 5.05, p=0.001                                                      |
|                                           | During                   | 593             | 10.41         |                                                                        |

239 Note: 1US\$ = 35.99 ETB, August, 2020

#### 240 Cost Difference Based on COVID-19 Pandemic

241 Patients were categorized according to the type of chronic disease for which they  
 242 visited study hospitals (Table 3). There was a significant median cost difference (n =  
 243 593, Z = 5.05, p = 0.001) between the cost of follow-up care during the COVID-19  
 244 pandemic lock-down compared to the costs incurred before the pandemic (Table 4).

1  
2  
3 245 This showed that 348 out of 593 (58.7%) patients incurred significantly higher costs  
4  
5 246 during the pandemic compared to before the pandemic. The median cost of follow-  
6  
7 247 up care during the pandemic was 10.41 US dollars compared to 8.04 US dollars  
8  
9 248 before the COVID-19 pandemic.

10  
11  
12 249 The study showed that there was no significant median difference in income lost  
13  
14 250 among patients who had income during and before the pandemic ( $n = 501$ ,  $Z =$   
15  
16 251  $1.780$ ,  $p = 0.075$ ). The median income lost during the pandemic was 1.48 US dollars  
17  
18 252 compared to the income lost before the pandemic, which was 1.40 US dollars.

19  
20  
21 253 There was a significant median cost difference in non-medical costs per patient  
22  
23 254 during and before the pandemic ( $n = 463$ ,  $Z = 4.903$ ,  $p = 0.001$ ). This showed  
24  
25 255 significantly higher costs have been incurred by more than half of the patients, 276  
26  
27 256 (59.61%), during the pandemic compared to before the pandemic. The median non-  
28  
29 257 medical cost observed among the patients was 5.49 and 2.57 US dollars per follow-  
30  
31 258 up visit during and before the pandemic, respectively.

32  
33  
34 259 The study revealed that there was no statistical significance in the median cost  
35  
36 260 difference of food and accommodation incurred during and before the pandemic ( $n =$   
37  
38 261  $199$ ,  $Z = 1.189$ ,  $p = 0.169$ ), and the median of this cost category was 4.29 and 3.13  
39  
40 262 US dollars during and before the pandemic lock-down, respectively.

41  
42  
43 263 The majority of the patients, 289 (67.2%), paid higher transportation fees when they  
44  
45 264 visited hospitals during the pandemic compared to before the pandemic. There was  
46  
47 265 a significant median cost difference in transportation costs during and before the  
48  
49 266 pandemic ( $n = 430$ ,  $Z = 8.028$ ,  $p = 0.00$ ), which was explained by the fact that the  
50  
51 267 median transportation cost was 1.14 US dollars and 2.29 US dollars during and  
52  
53 268 before the pandemic, respectively.  
54  
55  
56  
57  
58  
59  
60



1  
2  
3 269 More than half of the patients, 236 (55.5%), incurred higher costs for medical  
4  
5 270 services during the pandemic compared to before the pandemic. There was a  
6  
7 271 significant median cost difference during and before the pandemic ( $n = 425$ ,  $Z =$   
8  
9 272  $2.382$ ,  $p = 0.017$ ) in which the median cost was 4.29 and 3.71 US dollars during and  
10  
11 273 before the pandemic lock-down.

12  
13  
14 274 The study showed that the majority of the HTN patients, 128 (60.7%), paid a high  
15  
16 275 amount of money during the pandemic compared to before the pandemic among 211  
17  
18 276 patients who paid for the services. There was a significant median cost difference  
19  
20 277 per visit during and before the pandemic ( $n = 211$ ,  $Z = 3.632$ ,  $p = 0.00$ ). The median  
21  
22 278 cost observed among these patients was 7.58 and 10.14 US per follow-up visit  
23  
24 279 before and during the pandemic, respectively.

25  
26  
27 280 More than half of DM patients (59.17%) paid higher costs for the services during the  
28  
29 281 pandemic compared to before the pandemic. The total cost incurred by these  
30  
31 282 patients was significantly higher during the pandemic compared to before the  
32  
33 283 pandemic ( $n = 169$ ,  $Z = 3.095$ ,  $p = 0.002$ ). The median cost was 11.39 and 8.11 US  
34  
35 284 dollars during and before the pandemic lock-down, respectively.

36  
37  
38 285 The study revealed that there was no statistical significance in the median difference  
39  
40 286 in total cost incurred by HF patients during and before the pandemic era ( $n = 61$ ,  $Z =$   
41  
42 287  $-0.055$ ,  $p = 0.956$ ). Among 61 HF patients, only 31(50.82%) paid a higher amount of  
43  
44 288 money during the pandemic compared to before the pandemic.

45  
46  
47 289 Similarly, there was no statistical significance in the median difference of total cost  
48  
49 290 incurred by patients who visited the hospitals for mental health follow up for the  
50  
51 291 treatment of diseases during and before the pandemic era ( $n = 41$ ,  $Z = -1.497$ ,  $p =$   
52  
53 292  $0.134$ ). Among 41 patients, only 20(40.82%) paid a higher amount of money during  
54  
55 293 the pandemic.

294 The study also showed that there was a statistically significant median difference in  
 295 total cost incurred by HIV patients during and before the pandemic lock-down (n =  
 296 49, Z = 3.356, p = 0.00). Among 49 patients, the majority of them 34(69.39%)  
 297 incurred a higher cost per visit during the pandemic compared to before the  
 298 pandemic lock-down.

299 There was no statistical significance in the median difference of total cost incurred by  
 300 asthma patients during and before the pandemic era ( n = 28, Z = 1.731, p = 0.184).  
 301 Similarly, there was no statistically significant median difference in total cost incurred  
 302 by epilepsy patients during and before the pandemic lock-down (n = 18, Z = 1.328, p  
 303 = 0.184)(Table 4).

304 Table 3: Types of chronic diseases among chronic diseases patients at public  
 305 hospitals in the three Wallaga zones, Oromia National Regional state, Ethiopia  
 306 2020(N= 605)

| Types of Chronic diseases | Frequency(n) | Percentage (%) |
|---------------------------|--------------|----------------|
| Hypertension              | 214          | 35.4           |
| Diabetic mellitus         | 173          | 28.6           |
| Heart failure             | 62           | 10.2           |
| Mental disease            | 51           | 8.4            |
| HIV/AIDS                  | 50           | 8.3            |
| Asthma                    | 29           | 4.8            |
| Epilepsy                  | 18           | 3.0            |
| Stroke                    | 3            | 0.5            |

307

308

309 Table 4: Chronic diseases follow up visit for the treatment and care cost among  
 310 chronic disease patients at public hospitals in the three Wallaga zones, Oromia  
 311 National Regional state, Ethiopia 2020(N= 605)

| Types of CD    | Era of COVID-19 Pandemic | Observation (N) | Median (US\$) | Significance level of median cost difference (During- Before covid-19) |
|----------------|--------------------------|-----------------|---------------|------------------------------------------------------------------------|
| HTN            | Before                   | 211             | 7.58          | $Z = 3.632, p = 0.001$                                                 |
|                | During                   | 211             | 10.14         |                                                                        |
| DM             | Before                   | 169             | 8.12          | $Z = 3.095, p = 0.002$                                                 |
|                | During                   | 169             | 11.39         |                                                                        |
| HF             | Before                   | 61              | 9.06          | $Z = -0.055, p = 0.956$                                                |
|                | During                   | 61              | 8.2           |                                                                        |
| Mental disease | Before                   | 49              | 11.63         | $Z = -1.497, p = 0.134$                                                |
|                | During                   | 49              | 8.86          |                                                                        |
| HIV            | Before                   | 49              | 6.12          | $Z = 3.356, p = 0.000$                                                 |
|                | During                   | 49              | 12.24         |                                                                        |
| Asthma         | Before                   | 28              | 7.33          | $Z = 1.731, p = 0.184$                                                 |
|                | During                   | 28              | 10.34         |                                                                        |
| Epilepsy       | Before                   | 18              | 5.70          | $Z = 1.328, p = 0.184$                                                 |
|                | During                   | 18              | 10.00         |                                                                        |

Note: 1US\$ = 35.99 ETB, August, 2020

312

## 313 Discussion

1  
2  
3 314 The study evaluated the illness cost of chronic diseases before and during the  
4  
5 315 COVID-19 pandemic lock-down. Accordingly, more than half of the chronic patients  
6  
7 316 (58.7%) incurred a significantly higher total cost during the pandemic lock-down  
8  
9 317 compared to before the pandemic. This is explained by the median cost that was  
10  
11 318 increased by 29.39% (Table 4).

12  
13  
14 319 This finding supports the study's findings that chronic illness costs account for more  
15  
16 320 than 75% of total healthcare costs in high-income countries.<sup>22, 23</sup> During the  
17  
18 321 pandemic, most global healthcare resources are focused on COVID-19, and this  
19  
20 322 resource reallocation could disrupt the continuum of care for patients with CDs.<sup>11, 12,</sup>  
21  
22 323 <sup>24</sup> This could be explained by the fact that the global pandemic's disruption of the  
23  
24 324 health-care system may impose additional costs on CD patients.

25  
26 325 The study revealed that the non-medical cost during the follow-up visit per patient  
27  
28 326 during the era of COVID-19 was significantly higher than the cost incurred before the  
29  
30 327 pandemic era by the same patients, which was doubled during the pandemic. This  
31  
32 328 significant difference probably might be due to a strict lock-down that could affect  
33  
34 329 these patients adversely as they require regular follow-up visits that lead to further  
35  
36 330 health consequences and additional costs.<sup>25, 26</sup>

37  
38 331 Transportation costs were one of the cost categories that doubled during the  
39  
40 332 pandemic compared to before the pandemic. The median cost per patient per visit of  
41  
42 333 this cost category during the pandemic era was significantly increased by two folds.  
43  
44 334 This could be due to the fact that the government restricted the movement of its  
45  
46 335 people from place to place and laid a temporary restriction on public transport  
47  
48 336 across-regions and cities.<sup>17, 25</sup>

49  
50 337 The study discovered a significant median cost difference in medical costs, with the  
51  
52 338 median of this cost category increasing by 15.6% during the pandemic. This finding  
53  
54  
55  
56  
57  
58  
59  
60

1  
2  
3 339 is in line with the study report that revealed that before the pandemic, one in three  
4  
5 340 Americans did not take their medications as prescribed because of high costs, but  
6  
7 341 during a global pandemic, forgoing medications involves even more risks for chronic  
8  
9 342 care patients and incurs even higher costs in the long run. <sup>27</sup>

10 343 The study also evaluated the illness cost of each selected chronic disease.  
11  
12 344 Accordingly, for the follow-up care of HTN patients, the patients incurred significantly  
13  
14 345 higher costs during the pandemic compared to before the pandemic, which was  
15  
16 346 raised by 33.76% during the pandemic. The cost incurred before the COVID-  
17  
18 347 pandemic was almost comparable with other study reports, but the cost incurred  
19  
20 348 during the pandemic was higher than the study report on the cost of hypertension  
21  
22 349 before the COVID-19 lockdown in Ethiopia. <sup>28</sup>

23  
24 350 Again, the study showed that the cost of DM follow-up visit per patient during the  
25  
26 351 pandemic lock-down was significantly higher than the cost incurred before the  
27  
28 352 pandemic, which was increased by 40.53%. However, before and during the COVID-  
29  
30 353 19 lock-down, the cost of DM in this study was lower than the study reports in  
31  
32 354 Ethiopia. <sup>20, 29</sup> This variation could be attributed to differences in DM complications  
33  
34 355 and treatment among study participants.

35  
36 356 Despite HIV care and treatment being an exempted service in Ethiopia, patients  
37  
38 357 incurred nonmedical costs. The study revealed that the cost incurred by HIV patients  
39  
40 358 for follow-up treatment and care per visit per patient during the pandemic lock-down  
41  
42 359 was significantly higher than the cost incurred before the pandemic, which was  
43  
44 360 increased by two folds. The cost of HIV treatment and care reported in the study was  
45  
46 361 higher than in other Ethiopian studies. <sup>30, 31</sup>

1  
2  
3 362 However, there was no significant statistical median cost difference for the follow-up  
4  
5 363 care of HF, mental illness, asthma, and epilepsy during and before the pandemic; a  
6  
7  
8 364 slight median cost difference was observed during and before the pandemic.  
9

### 10 365 **Limitation of the Study**

11  
12 366 The cost findings in the study could be underestimated for the reason that the  
13  
14 367 income loss of unemployed patients and unemployed caregivers due to productivity  
15  
16 368 time lost were not included in the cost estimation. However, the cost of illness  
17  
18 369 analysis was limited to the patients' perspective and did not incorporate other  
19  
20 370 intangible costs (stigma and discrimination, pain) associated with chronic illness,  
21  
22 371 which were not also estimated in the current study.  
23  
24  
25

### 26 372 **Conclusion**

27  
28  
29 373 This study revealed that the total cost of follow-up care among chronic disease  
30  
31 374 patients during the COVID-19 pandemic lock-down was significantly higher  
32  
33 375 compared to before the pandemic era among the same patients. A comprehensive  
34  
35 376 package of chronic disease treatment and care is demanded at different levels of  
36  
37 377 health facilities in the health system of the country. Therefore, healthcare providers  
38  
39 378 should arrange special fee waiver mechanisms for chronic disease healthcare costs  
40  
41 379 during such types of pandemics and provide the services at proximal health facilities.  
42  
43  
44

### 45 380 **Declarations**

#### 46 381 **Ethical Approval and Consent to Participate**

47  
48  
49 382 An appropriate research ethical approval was obtained from the ethical review board  
50  
51 383 of Wallaga University, Institute of health sciences (Reference number:  
52  
53 384 IRB/233/2020). The study was conducted in accordance with the Declaration of  
54  
55 385 Helsinki. The questionnaire was designed to be anonymous, and the result did not  
56  
57 386 identify the personalities of the respondents; rather, it was presented in the  
58  
59  
60

1  
2  
3 387 aggregated statistics. The data was kept in protected and safe locations. Paper-  
4  
5 388 based data was kept in a locked cabinet, and computer-based data was password  
6  
7 389 secured. Data sharing was enacted based on the consent and permission of  
8  
9  
10 390 research participants and the ethical and legal rules of data sharing, and it was not  
11  
12 391 accessed by a third person, except the research teams.

### 14 392 **Authors Contribution and Conflict of interests**

15  
16  
17 393 All authors made substantial contributions to conception and design, acquisition of  
18  
19 394 data, or analysis and interpretation of data; took part in drafting the article or revising  
20  
21 395 it critically for important intellectual content; gave final approval of the version to be  
22  
23 396 published; and agreed to be accountable for all aspects of the work.

24  
25  
26  
27 397 All authors declared that they have no conflicts of interest related to this work.

### 28 29 398 **Consent for Publication**

30  
31 399 NA

### 32 33 400 **Availability of Data and Materials**

34  
35  
36  
37 401 All the data supporting the study's findings are within the manuscript. Additional  
38  
39 402 detailed information and raw data will be shared upon request addressed to the  
40  
41 403 corresponding author.

### 42 43 404 **Funding**

44  
45  
46  
47 405 This research received no specific grant from any funding agency in the public,  
48  
49 406 commercial, or not-for-profit sectors.

### 50 51 407 **Acknowledgments**

52  
53  
54 408 Researchers would like to acknowledge all participants in the study and respective  
55  
56 409 administrative bodies from top to bottom for their due cooperation and involvement.

### 57 58 410 **Acronyms**

1  
2  
3 411 ETB: Ethiopian Birr, HF: Heart Failure, HIV: Human Immune Virus, HTN:  
4  
5 412 Hypertension, LMICs: Low-and-middle-income countries, NCDs: Non-communicable  
6  
7 413 diseases, OOP: Out-of-pocket, TB: Tuberculosis, WHO: World Health Organization  
8  
9

## 10 414 **References**

11  
12 415 [1]. World Health Organization. A guide to implementation research in the prevention  
13  
14 416 and control of Non-communicable diseases. Geneva; Switzerland World Health  
15  
16 417 Organization; 2016.

17  
18  
19 418 [2].World Health Organization. Overview preventing chronic diseases: a vital  
20  
21 419 investment. Switzerland: 2004.

22  
23 420 [3].The World Bank. Human Development Network. The growing danger of non-  
24  
25 421 communicable diseases. Acting now to reverse course; 2011.

26  
27  
28 422 [4].Santosa, A, Byass, P. Diverse empirical evidence on epidemiological transition in  
29  
30 423 low-and middle-income countries: population-based findings from INDEPTH network  
31  
32 424 data. PLoS One 2016; 11, e0155753.

33  
34  
35 425 [5].World Health Organization. The double burden: Emerging epidemics and  
36  
37 426 persistent problems. World Health Report; 1999.

38  
39  
40 427 [6].Murray, C. J., Lopez, A. D. The global burden of disease: a comprehensive  
41  
42 428 assessment of mortality and disability from diseases, injuries, and risk factors in  
43  
44 429 1990 and projected to 2020: summary. Harvard School of Public Health on behalf of  
45  
46 430 the World Health Organization and the World Bank; 1996.

47  
48  
49 431 [7].Bollyky, T. J., Templin, T., Cohen, M., et al. Lower-income countries that face the  
50  
51 432 most rapid shift in non-communicable disease burden are also the least prepared.  
52  
53 433 Health Aff. 2017: 36, 1866–1875.  
54  
55  
56  
57  
58  
59  
60



- 1  
2  
3 434 [8].Engelgau MM, El-Saharty S, Kudesia P, et al. Capitalizing on the demographic  
4  
5 435 transition: tackling non-communicable diseases in South Asia: The World Bank;  
6  
7 436 2011.  
8  
9  
10 437 [9].Jiang H ZY, Tang W. Maintaining HIV care during the COVID-19 pandemic. The  
11  
12 438 Lancet HIV. 2020 May 1; 7:308-9.  
13  
14 439 [10].WHO Director-General's opening remarks at the Mission briefing on COVID-19.  
15  
16 440 Press release. 2020. Available at:  
17  
18 441 [https://www.who.int/dg/speeches/detail/whodirector-generals-opening-remarks-at-](https://www.who.int/dg/speeches/detail/whodirector-generals-opening-remarks-at-the-mission-briefing-on-covid-19---12-march-2020)  
19  
20 442 [the-mission-briefing-on-covid-19---12-march-2020](https://www.who.int/dg/speeches/detail/whodirector-generals-opening-remarks-at-the-mission-briefing-on-covid-19---12-march-2020)  
21  
22  
23 443 [11].World Health Organization. Information note on COVID-19 and non-  
24  
25 444 communicable diseases. Available at: [https://www.who.int/publications/m/item/](https://www.who.int/publications/m/item/covid-19-and-ncds)  
26  
27 445 [covid-19-and-ncds](https://www.who.int/publications/m/item/covid-19-and-ncds) Accessed on July 21, 2020.  
28  
29  
30 446 [12].Yogini V, Clare L, Francesco Z, et al. Impact of COVID-19 on routine care for  
31  
32 447 chronic diseases: A global survey of views from healthcare professionals; 2020.  
33  
34 448 [13].Fagan M. Huge fall in non-Covid hospital admissions and attendances. Irish  
35  
36 449 Examiner; 2020.  
37  
38  
39 450 [14].Julian C, Rebecca McG. Spillover Effects of the COVID-19 Pandemic Could  
40  
41 451 Drive Long-Term Health Consequences for Non-COVID-19 Patients. Health Affairs;  
42  
43 452 2020.  
44  
45  
46 453 [15].Chen D., Zhu L., Lin X., et al. Epilepsy control during an epidemic: emerging  
47  
48 454 approaches and a new management framework. Acta Epileptologica. 2020; 2:1–9.  
49  
50 455 doi: 10.1186/s42494-020-00015-z.  
51  
52  
53 456 [16].Ethiopian federal ministry of health. Ethiopia Confirmed the First Case Of Covid-  
54  
55 457 19. Press release; 2020. Available at: <http://www.moh.gov.et/ejcc/en/node/194> .  
56  
57 458 Accessed on July 15, 2020.  
58  
59  
60

- 1  
2  
3 459 [17].Strategic Partnership for International Health Regulations and Health Security  
4  
5 school of public health: COVID-19 Preparedness Bulletin Ethiopia; 2020. Available  
6 460  
7  
8 461 at: <https://extranet.who.int/sph/news/covid-19-preparedness-bulletin-ethiopia>.  
9
- 10 462 [18].Tamirat MA, Workeabeba A, Alemayehu W, et al. The Impact of COVID-19 on  
11  
12 463 Care Seeking Behavior of Patients at Tertiary Care Follow-up Clinics: A Cross-  
13  
14 464 Sectional Telephone Survey. Addis Ababa, Ethiopia; 2020. medRxiv preprint doi:  
15  
16 465 <https://doi.org/10.1101/2020.11.25.20236224>; 2020.  
17  
18
- 19 466 [19].Abhijit P. Health Economic Evaluation Methods Techniques. IOSR Journal of  
20  
21 467 Economics and Finance (IOSR-JEF). 2016; 7:1-9.  
22
- 23  
24 468 [20].Alemu Z, Workneh BD, Mohammed SA, et al. Economic Assessment of Direct  
25  
26 469 Cost of Illness of Diabetes Mellitus at Dessie Referral Hospital, North East  
27  
28 470 Ethiopia.2020. Int J Diabetes Clin Res 7:122. doi.org/10.23937/2377-3634/1410122  
29
- 30  
31 471 [21].Stanley L, David W. Hosmer Jr, et al. Adequacy of Sample Size in Health  
32  
33 472 Studies. World Health Organization. 1990; pp36-39.  
34
- 35 473 [22].Glynn LG., Valderas JM., Healy P., et al. The prevalence of multimorbidity in  
36  
37 474 primary care and its effect on health care utilization and cost. J of Family Pract.  
38  
39 475 2011; 28:516–23.  
40
- 41  
42 476 [23].Nuno R., Coleman K., Bengoa R., et al. Integrated care for chronic conditions:  
43  
44 477 the contribution of the ICCC Framework. Health Policy 2012; 105:55–64.  
45
- 46  
47 478 [24].Baird B. How has general practice responded to the Covid-19 (coronavirus)  
48  
49 479 outbreak? The `Kings Fund. Available at:[https://www.kingsfund.org.uk/blog/2020/](https://www.kingsfund.org.uk/blog/2020/04/covid-19-general-practice)  
50  
51 480 [04/covid-19-general-practice](https://www.kingsfund.org.uk/blog/2020/04/covid-19-general-practice). Accessed on June 25, 2020.  
52
- 53  
54 481 [25].Finet P, Le Bouquin Jeannes R, Dameron O, et al. Review of current  
55  
56 482 telemedicine applications for chronic diseases. Toward a more integrated system?  
57  
58 483 Irbm 2015;36.  
59  
60

- 1  
2  
3 484 [26].French J.A., Brodie M.J., Caraballo R., et al. Keeping people with epilepsy safe  
4  
5 485 during the Covid-19 pandemic. *Neurology*. 2020; 94:1032–1037. doi:  
6  
7 486 10.1212/WNL.00000000000009632.  
8  
9  
10 487 [27].Valenz. The Effects of COVID-19 on Chronic Disease Management and Five  
11  
12 488 Solutions Insurers Should Embrace; 2020.  
13  
14 489 [28].Zawudie AB, Lemma TD, Daka DW. Cost of Hypertension Illness and  
15  
16 490 Associated Factors Among Patients Attending Hospitals in Southwest Shewa Zone,  
17  
18 491 Oromia Regional State, Ethiopia. *ClinicoEconomics and Outcomes Research*  
19  
20 492 2020:12 201–211.  
21  
22  
23  
24 493• [29].Samson O, Amarech G, Mulugeta T, et al. economic burden of diabetes mellitus  
25  
26 494 to diabetic patients and their families attending health facilities in Addis ababa.2020.  
27  
28 495 *Ethiopian Medical Journal* 58(3)  
29  
30  
31  
32 496 [30].Berman, P; Alebachew, A; Mann, C; Agarwal, A; Abdella, E. 2016. Costs of  
33  
34 497 Publicly Funded Primary Hospitals, Departments, and Exempted Services in Ethiopia  
35  
36 498 Supplement to Paper 1 with expanded sample of primary hospitals. Harvard T.H.  
37  
38 499 Chan School of Public Health; Breakthrough International Consultancy, PLC: Boston,  
39  
40 500 Massachusetts and Addis Ababa, Ethiopia.  
41  
42  
43 501 [31].Asfaw DB, Degu J, Bjarne R, et al. Cost estimates of HIV care and treatment  
44  
45 502 with and without anti-retroviral therapy at Arba Minch Hospital in southern Ethiopia.  
46  
47 503 *Cost Effectiveness and Resource Allocation* 2009, 7:6 doi:10.1186/1478-7547-7-6.  
48  
49  
50  
51  
52  
53  
54  
55  
56  
57  
58  
59  
60

**STROBE 2007 (v4) Statement—Checklist of items that should be included in reports of *cross-sectional studies***

| Section/Topic                | Item # | Recommendation                                                                                                                                                                       | Reported on page # |
|------------------------------|--------|--------------------------------------------------------------------------------------------------------------------------------------------------------------------------------------|--------------------|
| <b>Title and abstract</b>    | 1      | (a) Indicate the study's design with a commonly used term in the title or the abstract                                                                                               | 1                  |
|                              |        | (b) Provide in the abstract an informative and balanced summary of what was done and what was found                                                                                  | 2                  |
| <b>Introduction</b>          |        |                                                                                                                                                                                      |                    |
| Background/rationale         | 2      | Explain the scientific background and rationale for the investigation being reported                                                                                                 | 3-4                |
| Objectives                   | 3      | State specific objectives, including any prespecified hypotheses                                                                                                                     | 2                  |
| <b>Methods</b>               |        |                                                                                                                                                                                      |                    |
| Study design                 | 4      | Present key elements of study design early in the paper                                                                                                                              | 5                  |
| Setting                      | 5      | Describe the setting, locations, and relevant dates, including periods of recruitment, exposure, follow-up, and data collection                                                      | 5                  |
| Participants                 | 6      | (a) Give the eligibility criteria, and the sources and methods of selection of participants                                                                                          | 6                  |
| Variables                    | 7      | Clearly define all outcomes, exposures, predictors, potential confounders, and effect modifiers. Give diagnostic criteria, if applicable                                             | 7                  |
| Data sources/<br>measurement | 8*     | For each variable of interest, give sources of data and details of methods of assessment (measurement). Describe comparability of assessment methods if there is more than one group | -                  |
| Bias                         | 9      | Describe any efforts to address potential sources of bias                                                                                                                            | -                  |
| Study size                   | 10     | Explain how the study size was arrived at                                                                                                                                            | 6                  |
| Quantitative variables       | 11     | Explain how quantitative variables were handled in the analyses. If applicable, describe which groupings were chosen and why                                                         | 8                  |
| Statistical methods          | 12     | (a) Describe all statistical methods, including those used to control for confounding                                                                                                | 8                  |
|                              |        | (b) Describe any methods used to examine subgroups and interactions                                                                                                                  | -                  |
|                              |        | (c) Explain how missing data were addressed                                                                                                                                          | 8                  |
|                              |        | (d) If applicable, describe analytical methods taking account of sampling strategy                                                                                                   | -                  |
|                              |        | (e) Describe any sensitivity analyses                                                                                                                                                | -                  |
| <b>Results</b>               |        |                                                                                                                                                                                      |                    |

|                          |     |                                                                                                                                                                                                                                                                                                                                                                                                               |       |
|--------------------------|-----|---------------------------------------------------------------------------------------------------------------------------------------------------------------------------------------------------------------------------------------------------------------------------------------------------------------------------------------------------------------------------------------------------------------|-------|
| Participants             | 13* | (a) Report numbers of individuals at each stage of study—eg numbers potentially eligible, examined for eligibility, confirmed eligible, included in the study, completing follow-up, and analysed<br>(b) Give reasons for non-participation at each stage<br>(c) Consider use of a flow diagram                                                                                                               | -     |
| Descriptive data         | 14* | (a) Give characteristics of study participants (eg demographic, clinical, social) and information on exposures and potential confounders<br>(b) Indicate number of participants with missing data for each variable of interest                                                                                                                                                                               | 8     |
| Outcome data             | 15* | Report numbers of outcome events or summary measures                                                                                                                                                                                                                                                                                                                                                          | -     |
| Main results             | 16  | (a) Give unadjusted estimates and, if applicable, confounder-adjusted estimates and their precision (eg, 95% confidence interval). Make clear which confounders were adjusted for and why they were included<br>(b) Report category boundaries when continuous variables were categorized<br>(c) If relevant, consider translating estimates of relative risk into absolute risk for a meaningful time period | -     |
| Other analyses           | 17  | Report other analyses done—eg analyses of subgroups and interactions, and sensitivity analyses                                                                                                                                                                                                                                                                                                                | -     |
| <b>Discussion</b>        |     |                                                                                                                                                                                                                                                                                                                                                                                                               |       |
| Key results              | 18  | Summarise key results with reference to study objectives                                                                                                                                                                                                                                                                                                                                                      | 12-14 |
| Limitations              | 19  | Discuss limitations of the study, taking into account sources of potential bias or imprecision. Discuss both direction and magnitude of any potential bias                                                                                                                                                                                                                                                    | 15    |
| Interpretation           | 20  | Give a cautious overall interpretation of results considering objectives, limitations, multiplicity of analyses, results from similar studies, and other relevant evidence                                                                                                                                                                                                                                    | -     |
| Generalisability         | 21  | Discuss the generalisability (external validity) of the study results                                                                                                                                                                                                                                                                                                                                         | -     |
| <b>Other information</b> |     |                                                                                                                                                                                                                                                                                                                                                                                                               |       |
| Funding                  | 22  | Give the source of funding and the role of the funders for the present study and, if applicable, for the original study on which the present article is based                                                                                                                                                                                                                                                 | 16    |

\*Give information separately for cases and controls in case-control studies and, if applicable, for exposed and unexposed groups in cohort and cross-sectional studies.

**Note:** An Explanation and Elaboration article discusses each checklist item and gives methodological background and published examples of transparent reporting. The STROBE checklist is best used in conjunction with this article (freely available on the Web sites of PLoS Medicine at <http://www.plosmedicine.org/>, Annals of Internal Medicine at <http://www.annals.org/>, and Epidemiology at <http://www.epidem.com/>). Information on the STROBE Initiative is available at [www.strobe-statement.org](http://www.strobe-statement.org).

# BMJ Open

## Impact of COVID-19 Pandemic on Cost of Chronic Diseases Treatment and Care at Public Hospitals in Wallaga Zones, Oromia Regional State, Ethiopia: Hospital Based Cross-Sectional Study

|                                 |                                                                                                                                                                                                                                                                                                                                                                                                                                                                                                                                                                                                                                                                                                                                                                                                                                 |
|---------------------------------|---------------------------------------------------------------------------------------------------------------------------------------------------------------------------------------------------------------------------------------------------------------------------------------------------------------------------------------------------------------------------------------------------------------------------------------------------------------------------------------------------------------------------------------------------------------------------------------------------------------------------------------------------------------------------------------------------------------------------------------------------------------------------------------------------------------------------------|
| Journal:                        | <i>BMJ Open</i>                                                                                                                                                                                                                                                                                                                                                                                                                                                                                                                                                                                                                                                                                                                                                                                                                 |
| Manuscript ID                   | bmjopen-2022-070195.R1                                                                                                                                                                                                                                                                                                                                                                                                                                                                                                                                                                                                                                                                                                                                                                                                          |
| Article Type:                   | Original research                                                                                                                                                                                                                                                                                                                                                                                                                                                                                                                                                                                                                                                                                                                                                                                                               |
| Date Submitted by the Author:   | 01-Jul-2023                                                                                                                                                                                                                                                                                                                                                                                                                                                                                                                                                                                                                                                                                                                                                                                                                     |
| Complete List of Authors:       | Terefa, Dufera; Wallaga University, Public Health<br>Tsfaye, Edosa; Wallaga University, Department of Public Health<br>Tolessa, Belachew; Wallaga University, Department of Public Health, Institute of Health Sciences<br>Desisa, Adisu; Wallaga University, Public Health<br>Olani, Wolkite ; Wallaga University, Public Health<br>Fetensa, Getahun; Wallaga University, Department of Nursing<br>Chego, Melese ; Wallaga University, Public Health<br>Abdisa, Eba ; Wallaga University, School of Nursing<br>Turi, Ebisa; Wallaga University, Department of Public Health<br>Bekuma, Tariku Tsfaye; Wallaga University, Department of Public health<br>Getachew, Motuma; Wallaga University, Public Health<br>Tsfaye, Lensa ; Wallaga University, Public Health<br>Tilahun, Temesgen; Wallaga University, School of Medicine |
| <b>Primary Subject Heading</b>: | Health policy                                                                                                                                                                                                                                                                                                                                                                                                                                                                                                                                                                                                                                                                                                                                                                                                                   |
| Secondary Subject Heading:      | Health economics, Health policy, Health services research, Infectious diseases, Public health                                                                                                                                                                                                                                                                                                                                                                                                                                                                                                                                                                                                                                                                                                                                   |
| Keywords:                       | Health Equity, Decision Making, EPIDEMIOLOGY, Health Services Accessibility, HEALTH SERVICES ADMINISTRATION & MANAGEMENT                                                                                                                                                                                                                                                                                                                                                                                                                                                                                                                                                                                                                                                                                                        |
|                                 |                                                                                                                                                                                                                                                                                                                                                                                                                                                                                                                                                                                                                                                                                                                                                                                                                                 |

SCHOLARONE™  
Manuscripts

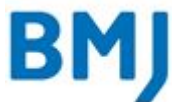

I, the Submitting Author has the right to grant and does grant on behalf of all authors of the Work (as defined in the below author licence), an exclusive licence and/or a non-exclusive licence for contributions from authors who are: i) UK Crown employees; ii) where BMJ has agreed a CC-BY licence shall apply, and/or iii) in accordance with the terms applicable for US Federal Government officers or employees acting as part of their official duties; on a worldwide, perpetual, irrevocable, royalty-free basis to BMJ Publishing Group Ltd ("BMJ") its licensees and where the relevant Journal is co-owned by BMJ to the co-owners of the Journal, to publish the Work in this journal and any other BMJ products and to exploit all rights, as set out in our [licence](#).

The Submitting Author accepts and understands that any supply made under these terms is made by BMJ to the Submitting Author unless you are acting as an employee on behalf of your employer or a postgraduate student of an affiliated institution which is paying any applicable article publishing charge ("APC") for Open Access articles. Where the Submitting Author wishes to make the Work available on an Open Access basis (and intends to pay the relevant APC), the terms of reuse of such Open Access shall be governed by a Creative Commons licence – details of these licences and which [Creative Commons](#) licence will apply to this Work are set out in our licence referred to above.

Other than as permitted in any relevant BMJ Author's Self Archiving Policies, I confirm this Work has not been accepted for publication elsewhere, is not being considered for publication elsewhere and does not duplicate material already published. I confirm all authors consent to publication of this Work and authorise the granting of this licence.

1  
2  
3 **1 Impact of COVID-19 Pandemic on Cost of Chronic Diseases Treatment and**  
4 **Care at Public Hospitals in Wallaga Zones, Oromia Regional State, Ethiopia:**  
5 **2**  
6 **3 Hospital Based Cross-Sectional Study**  
7  
8  
9

10 Dufera Rikitu Terefa <sup>1</sup>, Edosa Tesfaye <sup>1</sup>, Belachew Etana <sup>1</sup>, Adisu Ewunetu <sup>1</sup>, Wolkite  
11 Olani <sup>1</sup>, Getahun Fetensa <sup>2</sup>, Melese Chego <sup>1</sup>, Eba Abdisa <sup>2</sup>, Ebisa Turi <sup>1</sup>, Tariku  
12 Tesfaye Bekuma <sup>1</sup>, Motuma Getachew <sup>1</sup>, Lensa Tesfaye <sup>1</sup>, Temesgen Tilahun <sup>3</sup>  
13  
14  
15  
16

17 <sup>1</sup> Department of Public Health, Institute of Health Sciences, Wallaga University,  
18 Nekemte, Ethiopia  
19  
20

21 <sup>2</sup> School of Nursing, Institute of Health Sciences, Wallaga University, Nekemte,  
22 Ethiopia  
23  
24  
25

26 <sup>3</sup> School of Medicine, Institute of Health Sciences, Wallaga University, Nekemte,  
27 Ethiopia  
28  
29  
30

31 Co-author contact details:

32  
33 Edosa Tesfaye, E-mail: edosatesfaye2019@yahoo.com  
34

35 Belachew Etana, E-mail: ba.etana@gmail.com  
36

37 Adisu Ewunetu, E-mail: adisuewunetu2019@gmail.com  
38

39 Wolkite Olani, E-mail: walkiteolani2020@gmail.com  
40

41 Getahun Fetensa, E-mail: fetensagetahun@gmail.com  
42

43 Melese Chego, E-mail: melese\_chego@yahoo.com  
44

45 Eba Abdisa, E-mail: ebaabdisa@rocketmail.com  
46

47 Ebisa Turi, E-mail: ebakoturi@gmail.com  
48

49 Tariku Tesfaye Bekuma, E-mail: tarii2007@gmail.com  
50

51 Motuma Getachew, E-mail: motyamo@gmail.com  
52

53 Lensa Tesfaye, E-mail: lenlove539@gmail.com  
54

55 Temesgen Tilahun, E-mail: ttamuko@yahoo.com  
56  
57  
58  
59  
60



1  
2  
3 26 Corresponding author contact details:  
4

5 27 Full name: Dufera Rikitu Terefa  
6

7 28 P.O.Box=395, Wallaga University, Nekemte, Ethiopia.  
8

9 29 Tel. (+251)-922260706  
10

11 30 E-mail:duferarikitu24@gmail.com  
12  
13

14 31 **Abstract**

15  
16 32 **Introduction:** Globally, around one third of the population has at least one long-term  
17  
18 33 health condition that could be affected by the COVID-19 pandemic. Despite, studies  
19  
20 34 have revealed the direct impact of COVID-19 on health care provision and utilization,  
21  
22 35 the impact of the pandemic on cost of chronic disease treatment and care from a  
23  
24 36 patient perspective was scanty. So, the study aimed to determine the impact of  
25  
26 37 COVID-19 pandemic on cost of chronic diseases treatment and care at public  
27  
28 38 hospitals in Wallaga Zones, Oromia Regional State, Ethiopia, from August 01 to 31,  
29  
30 39 2020.  
31  
32

33  
34 40 **Methods:** An institutional based cross-sectional study design was used and the  
35  
36 41 sample size for the study (n = 642) was determined using a single population mean  
37  
38 42 formula. Data was collected using interviews and analyzed using SPSS version 25.  
39  
40 43 Descriptive statistics were performed and the cost of follow-up care before and after  
41  
42 44 the pandemic was compared using a Related-samples Wilcoxon signed-rank test,  
43  
44 45 declaring the level of significance of the median cost difference at  $P < 0.05$ .  
45  
46 47  
47  
48  
49

50 46 **Results:** A total of 642 patients were included in the study, among whom 605  
51  
52 47 (94.2%) of them responded to the interviews. There was a significant median cost  
53  
54 48 difference (n = 593,  $Z = 5.05$ ,  $p = 0.001$ ) between the cost of chronic diseases among  
55  
56 49 follow-up patients during the pandemic compared to the costs incurred by these  
57  
58 50 patients before the pandemic.  
59  
60

1  
2  
3 51 **Conclusion:** The cost of follow-up care among chronic disease patients during the  
4  
5 52 COVID-19 pandemic was significantly higher compared to before the pandemic era.  
6  
7 53 Therefore, healthcare providers should arrange special fee waiver mechanisms for  
8  
9 54 chronic disease healthcare costs during such types of pandemics and provide the  
10  
11 55 services at proximal health facilities.  
12  
13  
14

15 56 **Keywords:** COVID-19 Pandemic, Chronic Disease, Cost of Illness, Follow up Care,  
16  
17 57 Ethiopia  
18  
19

### 20 58 **Strengths and Limitations of the Study**

- 21  
22 59 • The cost findings in the study could be underestimated due to; the income loss of  
23  
24 60 unemployed patients and their companions due to productivity time lost were not  
25  
26 61 included in the cost estimation,  
27  
28 62 • The cost of illness analysis was limited to the patients' perspective and did not  
29  
30 63 incorporate the intangible costs,  
31  
32 64 • Also, children (<15 years) and elderly (greater than 65 years) were not included in  
33  
34 65 the valuation of lost work days.  
35  
36 66 • Finally, there might be a recall bias.  
37  
38  
39

### 40 67 **Background**

41  
42 68 Globally, chronic diseases (CDs) are the major public health problems that account  
43  
44 69 for 60% of all deaths(35% in low and 40% in middle income countries).<sup>1-3</sup> Including  
45  
46 70 Ethiopia many low and middle-income countries (LMICs) are undergoing a gradual  
47  
48 71 epidemiologic transition as the disease burden shifts from infectious to non-  
49  
50 72 communicable diseases(NCDs).<sup>4-6</sup>Healthcare systems in these countries are mostly  
51  
52 73 unprepared to handle the increasing burden of these diseases, resulting in no or  
53  
54 74 limited access to affordable prevention and diagnosis of NCDs.<sup>7</sup> These challenges  
55  
56  
57  
58  
59  
60

1  
2  
3 75 add up to higher NCDs treatment costs and even the financing of which mostly  
4  
5 76 comes from households' out-of-pocket (OOP) spending.<sup>8</sup>  
6

7  
8 77 COVID-19 pandemic was also another challenge which disrupts entire societies,  
9  
10 78 including the routine health care systems in Ethiopia. The comprehensive effort to  
11  
12 79 contain the pandemic and minimize the subsequent morbidity and mortality has  
13  
14 80 affected both the continuity and quality of care.<sup>9</sup> During the pandemic, most global  
15  
16 81 healthcare resources are focused on COVID-19 prevention and control. This  
17  
18 82 resource reallocation could disrupt the continuum of care for patients with CDs in this  
19  
20 83 era. Diabetes, chronic obstructive pulmonary disease, hypertension, heart disease,  
21  
22 84 asthma, cancer, and depression were some of the conditions reported to be most  
23  
24 85 impacted by the reduction in healthcare resources due to the pandemic.<sup>10</sup> Resources  
25  
26 86 at all levels have shifted away from CDs management and prevention during the  
27  
28 87 outbreak, and the lock-down of many services has translated into reduced access, a  
29  
30 88 decrease in referrals, and reduced hospitalizations of patients with non-COVID-19  
31  
32 89 pathology.<sup>11</sup> As the pandemic continues to rapidly spread, attentions often focuses on  
33  
34 90 the numbers of confirmed and probable cases, hospitalizations, and deaths, which  
35  
36 91 can be called the "direct" effects of the pandemic. However, these numbers do not  
37  
38 92 capture the full extent of the pandemic because it has also generated important  
39  
40 93 spillover (indirect) effects by decreasing the supply of and altering patient demand for  
41  
42 94 non-COVID-19-related medical care.<sup>12</sup>  
43  
44  
45  
46  
47  
48

49 95 In Ethiopia, the government declared a state of emergency, labeling the pandemic as  
50  
51 96 a national threat and launching overall preventive measures, including advising the  
52  
53 97 community to stay at home, practicing strict and frequent hand washing, and wearing  
54  
55 98 a face mask. Also, restricted the movement of its people from place to place and laid  
56  
57 99 temporary restrictions on market places, restaurants, shops, cinema houses,  
58  
59  
60

1  
2  
3 100 religious, and cities.<sup>13</sup> During this time, the number of hospital visits dropped sharply  
4  
5 101 to utilize health services, including CDs follow-up.<sup>14</sup> Many studies have revealed the  
6  
7 102 direct impact of COVID-19 on health care provision and utilization. But, there has  
8  
9  
10 103 been little emphasis on the impact of the pandemic on illness costs of chronic  
11  
12 104 disease follow-up care from a patient perspective. So, the study aimed to determine  
13  
14 105 the impact of the COVID-19 pandemic on the cost of follow-up care among chronic  
15  
16 106 disease patients at public hospitals.

## 19 107 **Methods and Materials**

### 21 108 **Study Design and Setting**

23  
24 109 An institutional-based cross-sectional study design was used to conduct this study. It  
25  
26 110 was conducted from August 01 to 31, 2020 in the three wallaga zones namely; East  
27  
28 111 Wallaga, West Wallaga, and Horro Guduru Wallaga zones of Oromia Regional State,  
29  
30 112 Ethiopia. These three Wallaga zones are among the twenty one zones of Oromia  
31  
32 113 region and were found in the western direction of the region, Oromia. The capital  
33  
34 114 town of east Wallaga zone, Nekemte town; west Wallaga zone, Gimbi town and  
35  
36 115 Horro Guduru Wallaga zone, shambu town were located 333km, 441km, and 314km  
37  
38 116 west direction of Addis Ababa, capital city of Ethiopia, respectively.

### 42 117 **Study Participants**

44 118 All chronic disease patients who visited public hospitals in the Wallaga Zones were  
45  
46 119 the source population, and all patients who visited the three Wallaga Zones' selected  
47  
48 120 study hospitals during the study period were the study population.

### 51 121 **Inclusion and Exclusion Criteria**

53 122 All patients of the selected CDs in the study area who visited the study hospitals were  
54  
55 123 included in the study. Patients whose age was less than 15 years old and without  
56  
57  
58  
59  
60

124 accompanying parents who were seriously ill and unable to respond to the interviews  
125 were excluded from the study.

### 126 **Sample Size and Sampling Methods**

127 The sample size was determined by using the single population mean formula,  
128 applying the following assumptions: two-sided alpha error ( $\epsilon$ ) set at 0.05, 95%  
129 confidence level, and mean cost of DM ( $\mu$ ) = 48.99 ETB, and standard deviation  
130 (SD)= 30.89 ETB<sup>15</sup>, adding 5% non-response rate.

131 Using the formula,  $n = \frac{(z - \frac{\alpha}{2})^2 * \sigma^2}{\epsilon^2 \mu^2}$  ..... [16], n= 642.

132 Among thirteen public hospitals in the study area, data was collected from the  
133 selected CDs of follow-up care patients from Nekemte specialized hospitals, Sire  
134 hospital, Gida hospital, Arjo hospital, Shambu hospital, Guduru hospital, Gimbi  
135 hospital, and Nedjo hospital which were selected using simple random sampling  
136 technique.

137 The determined sample size was allocated to each study hospital proportionally  
138 based on the proportion of each CD patients who attended follow-up care. Wallaga  
139 University referral hospital was purposely excluded from the study, which was an  
140 isolation and treatment center for COVID-19 during the study period, and four other  
141 hospitals were excluded due to their low CD patients flow.

142 Finally, to sample patients at each study hospital, systematic random sampling  
143 technique was used to select 642 participants. A simple random sampling technique  
144 was employed to select the first participant from the registration book.

### 145 **Data Collection**

146 The structured questionnaire was developed in English after reviewing relevant  
147 literatures, and it was translated into Afan Oromo. Data collection and supervision  
148 were carried out by eight data collectors, with four supervisors assigned. These data

1  
2  
3 149 collectors and supervisors were trained before the pre-test and actual data collection  
4  
5 150 started. The questionnaires were pre-tested in Bedele hospital using 32(5%) of the  
6  
7  
8 151 determined sample size. It was collected by face-to-face interview. Patients who  
9  
10 152 completed their chronic outpatient services and returned to leave the study hospitals  
11  
12 153 were interviewed.

## 14 154 **Study Variables**

15 155 **Socio-demographic and economic characteristics, health service costs (non-**  
16  
17 156 **medical costs; transportation, food, accommodation, and income lost, and**  
18  
19 157 **medical costs; registration, consultation, laboratory, radiology, and drugs)**  
20  
21  
22 158 **were assessed and determined.**  
23  
24  
25

### 26 **Operational Definitions**

27  
28 Before COVID-19: The period before March 13, 2020, when Ethiopia had the first  
29  
30 confirmed COVID-19 positive case.

31  
32  
33 Chronic disease follow up patients: A patient visited the study hospital for the  
34  
35 follow-up care of one of; hypertension (HTN), diabetic's mellitus (DM), heart failure  
36  
37 (HF), mental illness, HIV (Human immune virus), stroke, epilepsy, and asthma.

38  
39  
40 Chronic disease: Any of the following illnesses that persist over time, can gradually  
41  
42 progress, do not resolve spontaneously, and may not be cured, like HTN, DM, HF,  
43  
44 mental illness, HIV, stroke, epilepsy, and asthma.

45  
46  
47 Direct costs: The expenditures in ETB spent by chronic disease patients and their  
48  
49 families on the diagnosis and treatment of chronic illness per prescription of  
50  
51 physicians in the study hospitals.

52  
53  
54 During COVID-19: The period after March 13, 2020, when Ethiopia had the first  
55  
56 confirmed COVID-19 positive case.

57  
58 Indirect costs: the number of productive days lost by patients and their families as  
59  
60

a result of chronic illness treatment and care.

**Medical cost:** The cost component of chronic disease patients' follow-up visits at study hospitals that includes registration, laboratory, radiology, and drug costs.

**Non-medical cost:** The cost component that includes transportation, food, accommodation, and income lost among chronic disease patients during follow-up visits at study hospitals.

## 159 **Data Analysis**

160 Data was entered in to Epi-data version 3.1 and exported to SPSS version 25  
161 software for analysis. Descriptive statistics were performed for all study variables  
162 based on their characteristics. The bottom-up costing approach was used to  
163 estimate the direct cost for the follow-up visit with respect to patient perspective and  
164 the indirect costs (income lost due to productive time lost) were estimated using  
165 earnings lost both before and during COVID-19 pandemic.<sup>17</sup> The time foregone and  
166 productive time lost were converted into indirect costs based on the daily wage rate  
167 and then multiplied by the number of working days lost. The daily wage rate for  
168 patients was estimated by dividing their monthly income by 30 days for both patients  
169 and caregivers.<sup>17</sup> All costs included in the analysis were measured in terms of  
170 Ethiopian Birr (ETB) and were converted to US\$(US dollar) during the analysis, and  
171 the average currency exchange rate was (August 2020; 1 US\$ = 35.99 ETB).

172 Finally, the normality distribution of treatment cost data was checked, and it was not  
173 normally distributed. AS a result, non-parametric tests were used to analyze the  
174 median cost for each cost category, as well as a 2-paired sample Wilcoxon sign rank  
175 test to compare the costs incurred before and during the pandemic lock-down, with  
176 the level of significance of the median cost difference set at  $p < 0.05$ .

## 177 **Ethical consideration**

1  
2  
3 178 An appropriate research ethical approval was obtained from the ethical review board  
4  
5 179 of Wallaga University, Institute of health sciences (Reference number:  
6  
7  
8 180 IRB/233/2020). The study was conducted in accordance with the Declaration of  
9  
10 181 Helsinki. The questionnaire was designed to be anonymous, and the result did not  
11  
12 182 identify the personalities of the respondents; rather, it was presented in the  
13  
14 183 aggregated statistics. Written consent was obtained from the study participants. The  
15  
16 184 data was kept in protected and safe locations. Paper-based data was kept in a  
17  
18 185 locked cabinet, and computer-based data was password secured. Data sharing was  
19  
20 186 enacted based the ethical and legal rules of data sharing, and it was not accessed  
21  
22 187 by a third person, except the research teams.  
23  
24  
25

## 26 188 **Patient and Public Involvement**

27  
28  
29 189 None  
30

## 31 190 **Results**

### 32 33 191 **Socio-demographic Characteristics**

34  
35  
36 192 A total of 642 patients were included in the study, among whom 605 responded to  
37  
38 193 the interview, yielding 94.2% response rate. An almost equal number of male and  
39  
40 194 female participated in the study. More than half of the participants, 352 (58.2%),  
41  
42 195 were from urban areas, and the majority of them, 421 (69.6%), were married.

43  
44 196 Regarding the educational status of the participants, 137 (22.6%) were illiterates  
45  
46 197 (Table 1).The average participant's age was 43.29 (SD=16.5) years, the average  
47  
48 198 monthly income was 84.32 (SD=70.65) US dollars, and the average household size  
49  
50 199 was 4.46 (SD=3.43).  
51

52  
53  
54 200 Table 1: Socio-demographic characteristics and classification of study participants by  
55  
56 201 chronic diseases conditions in the public hospitals of the three Wallaga zones,  
57  
58 202 Oromia National Regional State, Ethiopia 2020 (N= 605)  
59  
60



203

| Characteristics (N= 605) |                   | Frequency (n) | Percentage (%) |
|--------------------------|-------------------|---------------|----------------|
| Sex                      | Male              | 302           | 49.9           |
|                          | Female            | 303           | 50.1           |
| Residence place          | Urban             | 352           | 58.2           |
|                          | Rural             | 253           | 41.8           |
| Marital status           | Single            | 130           | 21.5           |
|                          | Married           | 421           | 69.6           |
|                          | Separated         | 7             | 1.2            |
|                          | Divorced          | 2             | 0.3            |
|                          | Widowed           | 45            | 7.4            |
| Religion                 | Orthodox          | 165           | 27.3           |
|                          | Muslim            | 59            | 9.8            |
|                          | Protestant        | 373           | 61.7           |
|                          | Others            | 8             | 1.3            |
| Ethnic group             | Oromo             | 552           | 91.2           |
|                          | Amhara            | 48            | 7.9            |
|                          | Gurage            | 4             | 0.7            |
|                          | Tigre             | 1             | 0.2            |
| Educational status       | Illiterate        | 137           | 22.6           |
|                          | Read & Write      | 102           | 16.9           |
|                          | Grade 1-8         | 99            | 16.4           |
|                          | Grade 9-8         | 151           | 25.0           |
|                          | Diploma and above | 116           | 19.2           |

|                           |                     |     |      |
|---------------------------|---------------------|-----|------|
| Employment status         | Government employee | 93  | 15.4 |
|                           | NGO* employee       | 89  | 14.7 |
|                           | Merchant            | 100 | 16.5 |
|                           | Housewife           | 114 | 18.8 |
|                           | Farmer              | 107 | 17.7 |
|                           | Others**            | 102 | 16.9 |
| Types of Chronic diseases | Hypertension        | 214 | 35.4 |
|                           | Diabetic mellitus   | 173 | 28.6 |
|                           | Heart failure       | 62  | 10.2 |
|                           | Mental disease      | 51  | 8.4  |
|                           | HIV/AIDS            | 50  | 8.3  |
|                           | Asthma              | 29  | 4.8  |
|                           | Epilepsy            | 18  | 3.0  |
|                           | Stroke              | 3   | 0.5  |

204 \*NGO= non-governmental organization, \*\* Daily laborer, students

### 205 **The Overall Cost of CD Follow-up Care before and during the Pandemic**

206 The total cost for the treatment of CDs before the COVID-19 pandemic among  
 207 patients who incurred any one or more types of cost was on average  
 208 10.41(SD=10.19) US dollars, with the median cost of 9.76(IQR=8.64) US dollars  
 209 among 600 patients before the pandemic. The total cost of the treatment of the  
 210 diseases per follow-up visit during the pandemic among 593 patients was  
 211 13.02(SD=11.22) US dollars and the median cost was 12.27(IQR=10.40) US dollars.  
 212 The median income lost due to productivity time lost for the treatment of CDs before  
 213 the pandemic was 1.48(IQR=2.71) US dollars among 501 participants who had

214 income, which was almost similar to the income lost when visiting the study hospitals  
215 during the pandemic, which was 1.40 (IQR=2.85)US dollars.

216 The total median non-medical cost incurred for the follow-up care was  
217 6.05(IQR=5.55) US dollars before the pandemic among 463 patients and  
218 7.98(IQR=7.50) US dollars among the same number of patients during the pandemic.

219 The total median transportation cost to travel to hospitals and travel back to their  
220 homes, the participants incurred 1.141 (IQR=1.94) US dollars before the pandemic  
221 and 2.29(IQR=3.05) US dollars during the pandemic among 430 patients who paid  
222 for transportation.

223 The total median cost incurred for the accommodation and food during the follow-up  
224 visit was 3.43(IQR=4.91) US dollars before the pandemic and 4.29(IQR=633) US  
225 dollars during the pandemic among 199 participants.

226 The total median medical cost was 3.71(IQR=5.22) US dollars before the pandemic,  
227 whereas it was 4.29 (IQR=5.91) US dollars during the pandemic hospital visit among  
228 425 participants who paid for the prescribed drugs (Table 2).

229 Table 2: The overall cost of chronic diseases follow-up treatment and care before and  
230 during the pandemic among chronic diseases patients at public hospitals in the three  
231 Wallaga zones, Oromia National Regional state, Ethiopia 2020(N= 605)

| Cost Categories    | Era of<br>COVID-19<br>Pandemic | Observa<br>tion-on<br>(N) | Mean(SD)   | Median<br>(IQR) | Significance<br>level of median<br>cost difference<br>(During-Before<br>covid-19) |
|--------------------|--------------------------------|---------------------------|------------|-----------------|-----------------------------------------------------------------------------------|
| Income lost<br>(a) | Before                         | 501                       | 2.27(2.75) | 1.48(2.71)      | Z = 1.780,<br>p = 0.075                                                           |
|                    | During                         | 501                       | 2.25(2.72) | 1.40(2.85)      |                                                                                   |
| Transportation     | Before                         | 430                       | 1.91(2.13) | 1.14(1.94)      | Z = 8.028,                                                                        |

|                                        |        |     |              |              |            |
|----------------------------------------|--------|-----|--------------|--------------|------------|
| (b)                                    | During | 430 | 3.43(4.42)   | 2.29(3.05)   | p = 0.001  |
| Food and accommodation (c)             | Before | 199 | 4.67(5.05)   | 3.43(4.91)   | Z = 1.189, |
|                                        | During | 199 | 5.6(5.94)    | 4.29(6.33)   | p = 0.169  |
| Total nonmedical cost (a+b+c) = (d)    | Before | 463 | 4.58(5.35)   | 6.05(5.55)   | Z = 4.903, |
|                                        | During | 463 | 6.81(7.58)   | 7.98(7.50)   | p = 0.001  |
| Total medical cost (e)                 | Before | 425 | 5.51(8.43)   | 3.71(5.22)   | Z = 2.382, |
|                                        | During | 425 | 5.93(7.81)   | 4.29(5.91)   | p = 0.017  |
| Total cost per patient per visit (d+e) | Before | 600 | 10.41(10.19) | 9.76(8.64)   | Z = 5.05,  |
|                                        | During | 593 | 13.02(11.22) | 12.27(10.40) | p=0.001    |

Note: 1US\$ = 35.99 ETB, August, 2020; SD: Standard Deviation; IQR: Interquartile

Range

### Cost Difference Based on COVID-19 Pandemic

There was a significant median cost difference (n = 593, Z = 5.05, p = 0.001) between the cost of follow-up care during the COVID-19 pandemic lock-down compared to the costs incurred before the pandemic (Table 3). This showed that 348 out of 593 (58.7%) patients incurred significantly higher costs during the pandemic compared to before the pandemic. The median cost of follow-up care during the pandemic was 12.27(IQR=10.40) US dollars compared to 9.76(IQR=8.64) US dollars before the COVID-19 pandemic.

The study showed that there was no significant median difference in income lost among patients who had income during and before the pandemic (n = 501, Z = 1.780, p = 0.075). The median income lost during the pandemic was 1.48(IQR=2.71) US dollars compared to the income lost before the pandemic, which was 1.40(IQR=2.85) US dollars.

1  
2  
3 247 There was a significant median cost difference in non-medical costs per patient  
4  
5 248 during and before the pandemic (n = 463, Z = 4.903, p = 0.001). This showed  
6  
7 249 significantly higher costs have been incurred by more than half of the patients, 276  
8  
9 250 (59.61%), during the pandemic compared to before the pandemic. The median non-  
10  
11 251 medical cost observed among the patients was 7.98(IQR=7.50) and 6.05(IQR=5.55)  
12  
13 252 US dollars per follow-up visit during and before the pandemic, respectively.  
14  
15

16  
17 253 The study revealed that there was no statistical significance in the median cost  
18  
19 254 difference of food and accommodation incurred during and before the pandemic (n =  
20  
21 255 199, Z = 1.189, p = 0.169), and the median of this cost category was 4.29(IQR=6.33)  
22  
23 256 and 3.13(IQR=4.91) US dollars during and before the pandemic lock-down,  
24  
25 257 respectively.  
26  
27

28  
29 258 The majority of the patients, 289 (67.2%), paid higher transportation fees when they  
30  
31 259 visited hospitals during the pandemic compared to before the pandemic. There was  
32  
33 260 a significant median cost difference in transportation costs during and before the  
34  
35 261 pandemic (n = 430, Z = 8.028, p = 0.00), which was explained by the fact that the  
36  
37 262 median transportation cost was 1.14 (IQR=1.94) US dollars and 2.29 (IQR=3.05) US  
38  
39 263 dollars during and before the pandemic, respectively.  
40  
41

42  
43 264 More than half of the patients, 236 (55.5%), incurred higher costs for medical  
44  
45 265 services during the pandemic compared to before the pandemic. There was a  
46  
47 266 significant median cost difference during and before the pandemic (n = 425, Z =  
48  
49 267 2.382, p = 0.017) in which the median cost was 4.29 (IQR=5.91) and 3.71(IQR=5.22)  
50  
51 268 US dollars during and before the pandemic lock-down.  
52  
53

54 269 The study showed that the majority of the hypertensive (HTN) patients, 128 (60.7%),  
55  
56 270 paid a high amount of money during the pandemic compared to before the pandemic  
57  
58 271 among 211 patients who paid for the services. There was a significant median cost  
59  
60

1  
2  
3 272 difference per visit during and before the pandemic (n = 211, Z = 3.632, p = 0.00).  
4

5 273 The median cost observed among these patients was 7.58 (IQR=7.53) and 10.14  
6  
7 274 (IQR=8.74) US per follow-up visit before and during the pandemic, respectively.  
8

9  
10 275 More than half of diabetes mellitus (DM) patients (59.17%) paid higher costs for the  
11  
12 276 services during the pandemic compared to before the pandemic. The total cost  
13  
14 277 incurred by these patients was significantly higher during the pandemic compared to  
15  
16 278 before the pandemic (n = 169, Z = 3.095, p = 0.002). The median cost was 11.39  
17  
18 279 (IQR=10.87) and 8.11(IQR=9.26) US dollars during and before the pandemic lock-  
19  
20  
21 280 down, respectively.  
22

23  
24 281 The study revealed that there was no statistical significance in the median difference  
25  
26 282 in total cost incurred by heart failure (HF) patients during and before the pandemic  
27  
28 283 era (n = 61, Z = -0.055, p = 0.956). Among 61 HF patients, only 31(50.82%) paid a  
29  
30 284 higher amount of money during the pandemic compared to before the pandemic.  
31

32  
33 285 Similarly, there was no statistical significance in the median difference of total cost  
34  
35 286 incurred by patients who visited the hospitals for mental health follow up for the  
36  
37 287 treatment of diseases during and before the pandemic era (n = 41, Z = -1.497, p =  
38  
39 288 0.134). Among 41 patients, only 20(40.82%) paid a higher amount of money during  
40  
41 289 the pandemic.  
42

43  
44 290 The study also showed that there was a statistically significant median difference in  
45  
46 291 total cost incurred by HIV patients during and before the pandemic lock-down (n =  
47  
48 292 49, Z = 3.356, p = 0.00). Among 49 patients, the majority of them 34(69.39%)  
49  
50 293 incurred a higher cost per visit during the pandemic compared to before the  
51  
52 294 pandemic lock-down.  
53

54  
55  
56 295 There was no statistical significance in the median difference of total cost incurred by  
57  
58 296 asthma patients during and before the pandemic era (n = 28, Z = 1.731, p = 0.184).  
59  
60

297 Similarly, there was no statistically significant median difference in total cost incurred  
 298 by epilepsy patients during and before the pandemic lock-down ( $n = 18$ ,  $Z = 1.328$ ,  $p$   
 299  $= 0.184$ ) (Table 3).

300 Table 3: Cost of chronic diseases follow-up treatment and care by disease types  
 301 among chronic disease patients at public hospitals in the three Wallaga zones,  
 302 Oromia National Regional state, Ethiopia 2020(N= 605)

| Types of CDs   | Era of COVID-19 Pandemic | Observation (N) | Mean(SD)     | Median (IQR) | Significance level of median cost difference(During- Before covid-19) |
|----------------|--------------------------|-----------------|--------------|--------------|-----------------------------------------------------------------------|
| HTN            | Before                   | 211             | 10.03(11.86) | 7.58(7.53)   | $Z = 3.632$ ,<br>$p = 0.001$                                          |
|                | During                   | 211             | 12.65(10.42) | 10.14(8.74)  |                                                                       |
| DM             | Before                   | 169             | 10.64(8.42)  | 8.12(9.26)   | $Z = 3.095$ ,<br>$p = 0.002$                                          |
|                | During                   | 169             | 13.56(10.49) | 11.39(10.87) |                                                                       |
| HF             | Before                   | 61              | 12.64(12.85) | 9.06(8.53)   | $Z = -0.055$ ,<br>$p = 0.956$                                         |
|                | During                   | 61              | 12.51(11.34) | 8.2(12.52)   |                                                                       |
| Mental disease | Before                   | 49              | 13.08(8.97)  | 11.63(10.10) | $Z = -1.497$ ,<br>$p = 0.134$                                         |
|                | During                   | 49              | 10.91(8.45)  | 8.86(10.24)  |                                                                       |
| HIV            | Before                   | 49              | 7.37(6.65)   | 6.12(6.76)   | $Z = 3.356$ ,<br>$p = 0.000$                                          |
|                | During                   | 49              | 16.58(18.32) | 12.24(14.25) |                                                                       |
| Asthma         | Before                   | 28              | 8.95(6.40)   | 7.33(10.68)  | $Z = 1.731$ ,<br>$p = 0.184$                                          |
|                | During                   | 28              | 12.92(12.34) | 10.34(8.18)  |                                                                       |

|          |        |    |             |             |                         |
|----------|--------|----|-------------|-------------|-------------------------|
| Epilepsy | Before | 18 | 7.70(7.01)  | 5.70(11.18) | Z = 1.328,<br>p = 0.184 |
|          | During | 18 | 10.44(5.74) | 10.00(9.84) |                         |

303 *Note: 1US\$ = 35.99 ETB, August, 2020; SD: Standard Deviation; IQR: Interquartile*

304 *Range*

## 305 Discussion

306 This study was aimed to determine the impact of COVID-19 pandemic on cost of  
307 chronic diseases treatment and care at public hospitals in Wallaga Zones, Oromia  
308 Regional State, Ethiopia. The study found that, the cost of follow-up treatment and  
309 care among chronic disease patients during COVID-19 pandemic was significantly  
310 higher compared to before the pandemic era.

311 This indicated that, more than half of the chronic patients, 58.7%, incurred a  
312 significantly higher total cost during the pandemic lock-down compared to before the  
313 pandemic. This finding supports the study's findings that chronic illness costs  
314 account for more than 75% of total healthcare costs in high-income countries.<sup>18, 19</sup>  
315 During the pandemic, most global healthcare resources are focused on COVID-19,  
316 and this resource reallocation could disrupt the continuum of care for patients with  
317 CDs.<sup>9, 10, 20</sup> This could be explained by the fact that the global pandemic's disruption  
318 of the health-care system may impose additional costs on CD patients.

319 The study revealed that the non-medical cost during the follow-up visit per patient  
320 during the era of COVID-19 was significantly higher than the cost incurred before the  
321 pandemic era by the same patients, which was doubled during the pandemic. This  
322 significant difference probably might be due to a strict lock-down that could affect  
323 these patients adversely as they require regular follow-up visits that lead to further  
324 health consequences and additional costs.<sup>21,22</sup>



1  
2  
3 325 Transportation costs were one of the cost categories that doubled during the  
4  
5 326 pandemic compared to before the pandemic. The median cost per patient per visit of  
6  
7 327 this cost category during the pandemic era was significantly increased by two folds.  
8  
9  
10 328 This could be due to the fact that the government restricted the movement of its  
11  
12 329 people from place to place and laid a temporary restriction on public transport  
13  
14 330 across-regions and cities.<sup>13, 21</sup>  
15  
16  
17 331 The study discovered a significant median cost difference in medical costs, with the  
18  
19 332 median of this cost category increasing by 15.6% during the pandemic. This finding  
20  
21 333 is in line with the study report that revealed that before the pandemic, one in three  
22  
23 334 Americans did not take their medications as prescribed because of high costs, but  
24  
25 335 during a global pandemic, forgoing medications involves even more risks for chronic  
26  
27 336 care patients and incurs even higher costs in the long run.<sup>23</sup>  
28  
29  
30 337 The study also evaluated the illness cost of each selected chronic disease.  
31  
32 338 Accordingly, for the follow-up care of HTN patients, the patients incurred significantly  
33  
34 339 higher costs during the pandemic compared to before the pandemic, which was  
35  
36 340 raised by 33.76% during the pandemic. The cost incurred before the COVID-  
37  
38 341 pandemic was almost comparable with other study reports, but the cost incurred  
39  
40 342 during the pandemic was higher than the study report on the cost of hypertension  
41  
42 343 before the COVID-19 lockdown in Ethiopia.<sup>24</sup>  
43  
44  
45 344 Again, the study showed that the cost of DM follow-up visit per patient during the  
46  
47 345 pandemic lock-down was significantly higher than the cost incurred before the  
48  
49 346 pandemic, which was increased by 40.53%. However, before and during the COVID-  
50  
51 347 19 lock-down, the cost of DM in this study was lower than the study reports in  
52  
53 348 Ethiopia.<sup>15, 25</sup> This variation could be attributed to differences in DM complications  
54  
55 349 and treatment among study participants.  
56  
57  
58  
59  
60

1  
2  
3 350 Despite HIV care and treatment being an exempted service in Ethiopia, patients  
4  
5 351 incurred nonmedical costs. The study revealed that the cost incurred by HIV patients  
6  
7 352 for follow-up treatment and care per visit per patient during the pandemic lock-down  
8  
9 353 was significantly higher than the cost incurred before the pandemic, which was  
10  
11 354 increased by two folds. The cost of HIV treatment and care reported in the study was  
12  
13 355 higher than in other Ethiopian studies.<sup>26, 27</sup>

14  
15  
16 356 However, there was no significant statistical median cost difference for the follow-up  
17  
18 357 care of heart failure, mental illness, asthma, and epilepsy during and before the  
19  
20 358 pandemic; a slight median cost difference was observed during and before the  
21  
22 359 pandemic.

## 23 24 25 26 360 **Conclusion**

27  
28  
29 361 This study revealed that the total cost of follow-up care among chronic disease  
30  
31 362 patients during the COVID-19 pandemic lock-down was significantly higher  
32  
33 363 compared to before the pandemic era among the same patients. A comprehensive  
34  
35 364 package of chronic disease treatment and care is demanded at different levels of  
36  
37 365 health facilities in the health system of the country. Therefore, healthcare providers,  
38  
39 366 hospital administrators and the local government should arrange special fee waiver  
40  
41 367 mechanisms for chronic disease healthcare costs during such types of pandemics  
42  
43 368 and provide the services at proximal health facilities.

## 44 45 46 47 369 **Declarations**

### 48 49 370 **Authors Contribution and Conflict of interests**

50  
51 371 All authors made substantial contributions to conception and design, acquisition of  
52  
53 372 data, or analysis and interpretation of data; took part in drafting the article or revising  
54  
55 373 it critically for important intellectual content; gave final approval of the version to be  
56  
57 374 published; and agreed to be accountable for all aspects of the work.

1  
2  
3 375 All authors declared that they have no conflicts of interest related to this work.  
4

5 376 **Consent for Publication**

7 377 NA

9  
10 378 **Availability of Data and Materials**

11  
12  
13 379 All the data supporting the study's findings are within the manuscript. Additional  
14  
15 380 detailed information and raw data will be shared upon request addressed to the  
16  
17 381 corresponding author.  
18

19  
20  
21 382 **Funding**

22  
23 383 This research received no specific grant from any funding agency in the public,  
24  
25 384 commercial, or not-for-profit sectors.  
26

27  
28 385 **Acknowledgments**

29  
30 386 Researchers would like to acknowledge all participants in the study and respective  
31  
32 387 administrative bodies from top to bottom for their due cooperation and involvement.  
33

34  
35 388 **Acronyms**

36  
37 389 ETB: Ethiopian Birr, HF: Heart Failure, HIV: Human Immune Virus, HTN:  
38  
39 390 Hypertension, LMICs: Low-and-middle-income countries, NCDs: Non-communicable  
40  
41 391 diseases, OOP: Out-of-pocket, WHO: World Health Organization  
42

43  
44 392 **References**

45  
46 393 [1]. World Health Organization. A guide to implementation research in the prevention  
47  
48 394 and control of Non-communicable diseases. Geneva; Switzerland World Health  
49  
50 395 Organization; 2016.

51  
52 396 [2].World Health Organization. Overview preventing chronic diseases: a vital  
53  
54 397 investment. Switzerland: 2004.

55  
56 398 [3].The World Bank. Human Development Network. The growing danger of non-  
57  
58 399 communicable diseases. Acting now to reverse course; 2011.  
59  
60

- 1  
2  
3 400 [4].Santosa, A, Byass, P. Diverse empirical evidence on epidemiological transition in  
4  
5 401 low-and middle-income countries: population-based findings from INDEPTH network  
6  
7 402 data. PLoS One 2016; 11, e0155753.  
8  
9  
10 403 [5].World Health Organization. The double burden: Emerging epidemics and  
11  
12 404 persistent problems. World Health Report; 1999.  
13  
14 405 [6].Murray, C. J., Lopez, A. D. The global burden of disease: a comprehensive  
15  
16 406 assessment of mortality and disability from diseases, injuries, and risk factors in  
17  
18 407 1990 and projected to 2020: summary. Harvard School of Public Health on behalf of  
19  
20 408 the World Health Organization and the World Bank; 1996.  
21  
22  
23 409 [7].Bollyky, T. J., Templin, T., Cohen, M., et al. Lower-income countries that face the  
24  
25 410 most rapid shift in non-communicable disease burden are also the least prepared.  
26  
27 411 Health Aff. 2017: 36, 1866–1875.  
28  
29  
30 412 [8].Engelgau MM, El-Saharty S, Kudesia P, et al. Capitalizing on the demographic  
31  
32 413 transition: tackling non-communicable diseases in South Asia: The World Bank;  
33  
34 414 2011.  
35  
36  
37 415 [9].World Health Organization. Information note on COVID-19 and non-  
38  
39 416 communicable diseases. Available at: [https://www.who.int/publications/m/item/  
40  
41 covid-19-and-ncds](https://www.who.int/publications/m/item/covid-19-and-ncds) Accessed on July 21, 2020.  
42  
43  
44 418 [10].Yogini V, Clare L, Francesco Z, et al. Impact of COVID-19 on routine care for  
45  
46 419 chronic diseases: A global survey of views from healthcare professionals; 2020.  
47  
48  
49 420 [11].Fagan M. Huge fall in non-Covid hospital admissions and attendances. Irish  
50  
51 421 Examiner; 2020.  
52  
53  
54 422 [12].Julian C, Rebecca McG. Spillover Effects of the COVID-19 Pandemic Could  
55  
56 423 Drive Long-Term Health Consequences for Non-COVID-19 Patients. Health Affairs;  
57  
58 424 2020.  
59  
60

- 1  
2  
3 425 [13].Strategic Partnership for International Health Regulations and Health Security  
4  
5 426 school of public health: COVID-19 Preparedness Bulletin Ethiopia; 2020. Available  
6  
7 427 at: <https://extranet.who.int/sph/news/covid-19-preparedness-bulletin-ethiopia>.  
8  
9  
10 428 [14].Tamirat MA, Workeabeba A, Alemayehu W, et al. The Impact of COVID-19 on  
11  
12 429 Care Seeking Behavior of Patients at Tertiary Care Follow-up Clinics: A Cross-  
13  
14 430 Sectional Telephone Survey. Addis Ababa, Ethiopia; 2020. medRxiv preprint doi:  
15  
16 431 <https://doi.org/10.1101/2020.11.25.20236224>; 2020.  
17  
18  
19 432 [15].Alemu Z, Workneh BD, Mohammed SA, et al. Economic Assessment of Direct  
20  
21 433 Cost of Illness of Diabetes Mellitus at Dessie Referral Hospital, North East  
22  
23 434 Ethiopia.2020. Int J Diabetes Clin Res 7:122. doi.org/10.23937/2377-3634/1410122  
24  
25  
26 435 [16].Stanley L, David W. Hosmer Jr, et al. Adequacy of Sample Size in Health  
27  
28 436 Studies. World Health Organization. 1990; pp36-39.  
29  
30  
31 437 [17].Abhijit P. Health Economic Evaluation Methods Techniques. IOSR Journal of  
32  
33 438 Economics and Finance (IOSR-JEF). 2016; 7:1-9.  
34  
35  
36 439 [18].Glynn LG., Valderas JM., Healy P., et al. The prevalence of multimorbidity in  
37  
38 440 primary care and its effect on health care utilization and cost. J of Family Pract.  
39  
40 441 2011; 28:516–23.  
41  
42  
43 442 [19].Nuno R., Coleman K., Bengoa R., et al. Integrated care for chronic conditions:  
44  
45 443 the contribution of the ICCC Framework. Health Policy 2012; 105:55–64.  
46  
47  
48 444 [20].Baird B. How has general practice responded to the Covid-19 (coronavirus)  
49  
50 445 outbreak? The `Kings Fund. Available at:[https://www.kingsfund.org.uk/blog/2020/](https://www.kingsfund.org.uk/blog/2020/04/covid-19-general-practice)  
51  
52 446 [04/covid-19-general-practice](https://www.kingsfund.org.uk/blog/2020/04/covid-19-general-practice). Accessed on June 25, 2020.  
53  
54  
55 447 [21].Finet P, Le Bouquin Jeannes R, Dameron O, et al. Review of current  
56  
57 448 telemedicine applications for chronic diseases. Toward a more integrated system?  
58  
59 449 Irbm 2015;36.  
60

- 1  
2  
3 450 [22].French J.A., Brodie M.J., Caraballo R., et al. Keeping people with epilepsy safe  
4  
5 451 during the Covid-19 pandemic. *Neurology*. 2020; 94:1032–1037. doi:  
6  
7 452 10.1212/WNL.00000000000009632.  
8  
9  
10 453 [23].Valenz. The Effects of COVID-19 on Chronic Disease Management and Five  
11  
12 454 Solutions Insurers Should Embrace; 2020.  
13  
14 455 [24].Zawudie AB, Lemma TD, Daka DW. Cost of Hypertension Illness and  
15  
16 456 Associated Factors Among Patients Attending Hospitals in Southwest Shewa Zone,  
17  
18 457 Oromia Regional State, Ethiopia. *ClinicoEconomics and Outcomes Research*  
19  
20 458 2020:12 201–211.  
21  
22  
23  
24 459• [25].Samson O, Amarech G, Mulugeta T, et al. economic burden of diabetes mellitus  
25  
26 460 to diabetic patients and their families attending health facilities in Addis ababa.2020.  
27  
28 461 *Ethiopian Medical Journal* 58(3).  
29  
30  
31 462• [26].Berman, P; Alebachew, A; Mann, C; Agarwal, A; Abdella, E. 2016. Costs of  
32  
33 463 Publicly Funded Primary Hospitals, Departments, and Exempted Services in Ethiopia  
34  
35 464 Supplement to Paper 1 with expanded sample of primary hospitals. Harvard T.H.  
36  
37 465 Chan School of Public Health; Breakthrough International Consultancy, PLC: Boston,  
38  
39 466 Massachusetts and Addis Ababa, Ethiopia.  
40  
41  
42 467• [27].Asfaw DB, Degu J, Bjarne R, et al. Cost estimates of HIV care and treatment  
43  
44 468 with and without anti-retroviral therapy at Arba Minch Hospital in southern Ethiopia.  
45  
46 469 Cost Effectiveness and Resource Allocation 2009, 7:6 doi:10.1186/1478-7547-7-6.  
47  
48  
49  
50  
51  
52  
53  
54  
55  
56  
57  
58  
59  
60

**STROBE 2007 (v4) Statement—Checklist of items that should be included in reports of *cross-sectional studies***

| Section/Topic                | Item # | Recommendation                                                                                                                                                                       | Reported on page # |
|------------------------------|--------|--------------------------------------------------------------------------------------------------------------------------------------------------------------------------------------|--------------------|
| <b>Title and abstract</b>    | 1      | (a) Indicate the study’s design with a commonly used term in the title or the abstract                                                                                               | 1                  |
|                              |        | (b) Provide in the abstract an informative and balanced summary of what was done and what was found                                                                                  | 2                  |
| <b>Introduction</b>          |        |                                                                                                                                                                                      |                    |
| Background/rationale         | 2      | Explain the scientific background and rationale for the investigation being reported                                                                                                 | 3-4                |
| Objectives                   | 3      | State specific objectives, including any prespecified hypotheses                                                                                                                     | 2                  |
| <b>Methods</b>               |        |                                                                                                                                                                                      |                    |
| Study design                 | 4      | Present key elements of study design early in the paper                                                                                                                              | 5                  |
| Setting                      | 5      | Describe the setting, locations, and relevant dates, including periods of recruitment, exposure, follow-up, and data collection                                                      | 5                  |
| Participants                 | 6      | (a) Give the eligibility criteria, and the sources and methods of selection of participants                                                                                          | 6                  |
| Variables                    | 7      | Clearly define all outcomes, exposures, predictors, potential confounders, and effect modifiers. Give diagnostic criteria, if applicable                                             | 7                  |
| Data sources/<br>measurement | 8*     | For each variable of interest, give sources of data and details of methods of assessment (measurement). Describe comparability of assessment methods if there is more than one group | -                  |
| Bias                         | 9      | Describe any efforts to address potential sources of bias                                                                                                                            | -                  |
| Study size                   | 10     | Explain how the study size was arrived at                                                                                                                                            | 6                  |
| Quantitative variables       | 11     | Explain how quantitative variables were handled in the analyses. If applicable, describe which groupings were chosen and why                                                         | 8                  |
| Statistical methods          | 12     | (a) Describe all statistical methods, including those used to control for confounding                                                                                                | 8                  |
|                              |        | (b) Describe any methods used to examine subgroups and interactions                                                                                                                  | -                  |
|                              |        | (c) Explain how missing data were addressed                                                                                                                                          | 8                  |
|                              |        | (d) If applicable, describe analytical methods taking account of sampling strategy                                                                                                   | -                  |
|                              |        | (e) Describe any sensitivity analyses                                                                                                                                                | -                  |
| <b>Results</b>               |        |                                                                                                                                                                                      |                    |

|                          |     |                                                                                                                                                                                                              |       |
|--------------------------|-----|--------------------------------------------------------------------------------------------------------------------------------------------------------------------------------------------------------------|-------|
| Participants             | 13* | (a) Report numbers of individuals at each stage of study—eg numbers potentially eligible, examined for eligibility, confirmed eligible, included in the study, completing follow-up, and analysed            | -     |
|                          |     | (b) Give reasons for non-participation at each stage                                                                                                                                                         | -     |
|                          |     | (c) Consider use of a flow diagram                                                                                                                                                                           | -     |
| Descriptive data         | 14* | (a) Give characteristics of study participants (eg demographic, clinical, social) and information on exposures and potential confounders                                                                     | 8     |
|                          |     | (b) Indicate number of participants with missing data for each variable of interest                                                                                                                          | -     |
| Outcome data             | 15* | Report numbers of outcome events or summary measures                                                                                                                                                         | -     |
| Main results             | 16  | (a) Give unadjusted estimates and, if applicable, confounder-adjusted estimates and their precision (eg, 95% confidence interval). Make clear which confounders were adjusted for and why they were included | -     |
|                          |     | (b) Report category boundaries when continuous variables were categorized                                                                                                                                    | -     |
|                          |     | (c) If relevant, consider translating estimates of relative risk into absolute risk for a meaningful time period                                                                                             | -     |
| Other analyses           | 17  | Report other analyses done—eg analyses of subgroups and interactions, and sensitivity analyses                                                                                                               | -     |
| <b>Discussion</b>        |     |                                                                                                                                                                                                              |       |
| Key results              | 18  | Summarise key results with reference to study objectives                                                                                                                                                     | 12-14 |
| Limitations              | 19  | Discuss limitations of the study, taking into account sources of potential bias or imprecision. Discuss both direction and magnitude of any potential bias                                                   | 15    |
| Interpretation           | 20  | Give a cautious overall interpretation of results considering objectives, limitations, multiplicity of analyses, results from similar studies, and other relevant evidence                                   | -     |
| Generalisability         | 21  | Discuss the generalisability (external validity) of the study results                                                                                                                                        | -     |
| <b>Other information</b> |     |                                                                                                                                                                                                              |       |
| Funding                  | 22  | Give the source of funding and the role of the funders for the present study and, if applicable, for the original study on which the present article is based                                                | 16    |

\*Give information separately for cases and controls in case-control studies and, if applicable, for exposed and unexposed groups in cohort and cross-sectional studies.

**Note:** An Explanation and Elaboration article discusses each checklist item and gives methodological background and published examples of transparent reporting. The STROBE checklist is best used in conjunction with this article (freely available on the Web sites of PLoS Medicine at <http://www.plosmedicine.org/>, Annals of Internal Medicine at <http://www.annals.org/>, and Epidemiology at <http://www.epidem.com/>). Information on the STROBE Initiative is available at [www.strobe-statement.org](http://www.strobe-statement.org).



# BMJ Open

## Impact of the COVID-19 pandemic on the cost of chronic diseases treatment and care at public hospitals in Wallaga zones, Oromia Regional State, Ethiopia: A hospital-based, cross-sectional study

|                                 |                                                                                                                                                                                                                                                                                                                                                                                                                                                                                                                                                                                                                                                                                                                                                                                                                                 |
|---------------------------------|---------------------------------------------------------------------------------------------------------------------------------------------------------------------------------------------------------------------------------------------------------------------------------------------------------------------------------------------------------------------------------------------------------------------------------------------------------------------------------------------------------------------------------------------------------------------------------------------------------------------------------------------------------------------------------------------------------------------------------------------------------------------------------------------------------------------------------|
| Journal:                        | <i>BMJ Open</i>                                                                                                                                                                                                                                                                                                                                                                                                                                                                                                                                                                                                                                                                                                                                                                                                                 |
| Manuscript ID                   | bmjopen-2022-070195.R2                                                                                                                                                                                                                                                                                                                                                                                                                                                                                                                                                                                                                                                                                                                                                                                                          |
| Article Type:                   | Original research                                                                                                                                                                                                                                                                                                                                                                                                                                                                                                                                                                                                                                                                                                                                                                                                               |
| Date Submitted by the Author:   | 08-Sep-2023                                                                                                                                                                                                                                                                                                                                                                                                                                                                                                                                                                                                                                                                                                                                                                                                                     |
| Complete List of Authors:       | Terefa, Dufera; Wallaga University, Public Health<br>Tsfaye, Edosa; Wallaga University, Department of Public Health<br>Tolessa, Belachew; Wallaga University, Department of Public Health, Institute of Health Sciences<br>Desisa, Adisu; Wallaga University, Public Health<br>Olani, Wolkite ; Wallaga University, Public Health<br>Fetensa, Getahun; Wallaga University, Department of Nursing<br>Chego, Melese ; Wallaga University, Public Health<br>Abdisa, Eba ; Wallaga University, School of Nursing<br>Turi, Ebisa; Wallaga University, Department of Public Health<br>Bekuma, Tariku Tsfaye; Wallaga University, Department of Public health<br>Getachew, Motuma; Wallaga University, Public Health<br>Tsfaye, Lensa ; Wallaga University, Public Health<br>Tilahun, Temesgen; Wallaga University, School of Medicine |
| <b>Primary Subject Heading</b>: | Health policy                                                                                                                                                                                                                                                                                                                                                                                                                                                                                                                                                                                                                                                                                                                                                                                                                   |
| Secondary Subject Heading:      | Health economics, Health policy, Health services research, Infectious diseases, Public health                                                                                                                                                                                                                                                                                                                                                                                                                                                                                                                                                                                                                                                                                                                                   |
| Keywords:                       | Health Equity, Decision Making, EPIDEMIOLOGY, Health Services Accessibility, HEALTH SERVICES ADMINISTRATION & MANAGEMENT                                                                                                                                                                                                                                                                                                                                                                                                                                                                                                                                                                                                                                                                                                        |
|                                 |                                                                                                                                                                                                                                                                                                                                                                                                                                                                                                                                                                                                                                                                                                                                                                                                                                 |

SCHOLARONE™  
Manuscripts



I, the Submitting Author has the right to grant and does grant on behalf of all authors of the Work (as defined in the below author licence), an exclusive licence and/or a non-exclusive licence for contributions from authors who are: i) UK Crown employees; ii) where BMJ has agreed a CC-BY licence shall apply, and/or iii) in accordance with the terms applicable for US Federal Government officers or employees acting as part of their official duties; on a worldwide, perpetual, irrevocable, royalty-free basis to BMJ Publishing Group Ltd ("BMJ") its licensees and where the relevant Journal is co-owned by BMJ to the co-owners of the Journal, to publish the Work in this journal and any other BMJ products and to exploit all rights, as set out in our [licence](#).

The Submitting Author accepts and understands that any supply made under these terms is made by BMJ to the Submitting Author unless you are acting as an employee on behalf of your employer or a postgraduate student of an affiliated institution which is paying any applicable article publishing charge ("APC") for Open Access articles. Where the Submitting Author wishes to make the Work available on an Open Access basis (and intends to pay the relevant APC), the terms of reuse of such Open Access shall be governed by a Creative Commons licence – details of these licences and which [Creative Commons](#) licence will apply to this Work are set out in our licence referred to above.

Other than as permitted in any relevant BMJ Author's Self Archiving Policies, I confirm this Work has not been accepted for publication elsewhere, is not being considered for publication elsewhere and does not duplicate material already published. I confirm all authors consent to publication of this Work and authorise the granting of this licence.

1  
2  
3 1 Impact of the COVID-19 pandemic on the cost of chronic diseases treatment and  
4  
5 2 care at public hospitals in Wallaga zones, Oromia Regional State, Ethiopia: A  
6  
7 3 hospital-based, cross-sectional study  
8  
9

10 4 Dufera Rikitu Terefa <sup>1</sup>, Edosa Tesfaye <sup>1</sup>, Belachew Etana <sup>1</sup>, Adisu Ewunetu <sup>1</sup>, Wolkite  
11  
12 5 Olani <sup>1</sup>, Getahun Fetensa <sup>2</sup>, Melese Chego <sup>1</sup>, Eba Abdisa <sup>2</sup>, Ebisa Turi <sup>1</sup>, Tariku  
13  
14 6 Tesfaye Bekuma <sup>1</sup>, Motuma Getachew <sup>1</sup>, Lensa Tesfaye <sup>1</sup>, Temesgen Tilahun <sup>3</sup>  
15  
16

17 7 <sup>1</sup> Department of Public Health, Institute of Health Sciences, Wallaga University,  
18  
19 8 Nekemte, Ethiopia  
20

21 9 <sup>2</sup> School of Nursing, Institute of Health Sciences, Wallaga University, Nekemte,  
22  
23 10 Ethiopia  
24  
25

26 11 <sup>3</sup> School of Medicine, Institute of Health Sciences, Wallaga University, Nekemte,  
27  
28 12 Ethiopia  
29  
30

31 13 Co-author contact details:  
32

33 14 Edosa Tesfaye, E-mail: edosatesfaye2019@yahoo.com  
34

35 15 Belachew Etana, E-mail: ba.etana@gmail.com  
36

37 16 Adisu Ewunetu, E-mail: adisuewunetu2019@gmail.com  
38

39 17 Wolkite Olani, E-mail: walkiteolani2020@gmail.com  
40

41 18 Getahun Fetensa, E-mail: fetensagetahun@gmail.com  
42

43 19 Melese Chego, E-mail: melese\_chego@yahoo.com  
44

45 20 Eba Abdisa, E-mail: ebaabdisa@rocketmail.com  
46

47 21 Ebisa Turi, E-mail: ebakoturi@gmail.com  
48

49 22 Tariku Tesfaye Bekuma, E-mail: tarii2007@gmail.com  
50

51 23 Motuma Getachew, E-mail: motyamo@gmail.com  
52

53 24 Lensa Tesfaye, E-mail: lenlove539@gmail.com  
54

55 25 Temesgen Tilahun, E-mail: ttamuko@yahoo.com  
56  
57  
58  
59  
60

1  
2  
3 26 Corresponding author contact details:  
4

5 27 Full name: Dufera Rikitu Terefa  
6

7 28 P.O.Box=395, Wallaga University, Nekemte, Ethiopia.  
8

9 29 Tel. (+251)-922260706  
10

11 30 E-mail:duferarikitu24@gmail.com  
12  
13

14 31 **Abstract**

15  
16 32 **Introduction:** Globally, around one third of the population has at least one long-term  
17  
18 33 health condition that could be affected by the COVID-19 pandemic. Despite, studies  
19  
20 34 have revealed the direct impact of COVID-19 on health care provision and utilization,  
21  
22 35 the impact of the pandemic on cost of chronic disease treatment and care from a  
23  
24 36 patient perspective was scanty. So, the study aimed to determine the impact of the  
25  
26 37 COVID-19 pandemic on cost of chronic diseases treatment and care at public  
27  
28 38 hospitals in Wallaga Zones, Oromia Regional State, Ethiopia, from August 1 to 31,  
29  
30 39 2020.  
31  
32

33  
34 40 Globally, around one-third of the population has at least one long-term health  
35  
36 41 condition that could be affected by the COVID-19 pandemic. Despite studies  
37  
38 42 revealing the direct impact of COVID-19 on health care provision and utilization, the  
39  
40 43 impact of the pandemic on the cost of chronic disease treatment and care from a  
41  
42 44 patient perspective was scanty. So, the study aimed to determine the impact of the  
43  
44 45 COVID-19 pandemic on the cost of chronic disease treatment and care at public  
45  
46 46 hospitals in Wallaga Zones, Oromia Regional State, Ethiopia, from August 1 to 31,  
47  
48 47 2020.  
49  
50

51  
52 53 **Methods:** An institutional-based cross-sectional study design was used, and the  
53  
54 54 sample size for the study (n = 642) was determined using a single population mean  
55  
56 55 formula. Data was collected using interviews and analyzed using SPSS version 25.  
56  
57 56  
58 57  
59 58  
60 59

1  
2  
3 51 Descriptive statistics were performed, and the cost of follow-up care before and after  
4  
5 52 the pandemic was compared using a related-samples Wilcoxon signed-rank test,  
6  
7  
8 53 declaring the level of significance of the median cost difference at  $P < 0.05$ .

9  
10  
11 54 **Results:** A total of 642 patients were included in the study, of whom 605 (94.2%)  
12  
13 55 responded to the interviews. There was a significant median cost difference ( $n = 593$ ,  
14  
15 56  $Z = 5.05$ ,  $p = 0.001$ ) between the cost of chronic diseases among follow-up patients  
16  
17 57 during the pandemic and the costs incurred by these patients before the pandemic.

18  
19  
20  
21 58 **Conclusion:** The cost of follow-up care among chronic disease patients during the  
22  
23 59 COVID-19 pandemic was significantly higher compared to before the pandemic era.  
24  
25 60 Therefore, healthcare providers should arrange special fee waiver mechanisms for  
26  
27 61 chronic disease healthcare costs during such types of pandemics and provide the  
28  
29 62 services at proximal health facilities.

30  
31  
32  
33 63 **Keywords:** COVID-19 Pandemic, Chronic Disease, Cost of Illness, Follow up care,  
34  
35 64 Ethiopia

### 36 37 38 65 **Strengths and Limitations of the Study**

- 39  
40 66 • A less costly and time-consuming retrospective costing approach was used.  
41  
42 67 • The cost of illness analysis in this study was limited to the patients' perspective.  
43  
44 68 • The study did not include the costs experienced by patients who were employed  
45  
46 69 before the pandemic but then lost their jobs.  
47  
48 70 • Children less than 15 years of age and the elderly greater than 65 years of age  
49  
50 71 were not included in the valuation of lost work days in the cost estimation.  
51  
52 72 • There might also be a recall bias.  
53  
54  
55  
56  
57  
58  
59  
60

## 73 **Background**

74 Chronic diseases (CDs) are the major public health problems that account for 60% of  
75 all deaths (35% in low- and middle-income countries). [1-3] including Ethiopia, many  
76 low and middle-income countries (LMICs) are undergoing a gradual epidemiologic  
77 transition as the disease burden shifts from infectious to non-communicable  
78 diseases (NCDs). [4–6] Healthcare systems in these countries are mostly  
79 unprepared to handle the increasing burden of these diseases, resulting in no or  
80 limited access to affordable prevention and diagnosis of NCDs. [7] These challenges  
81 add up to higher NCD treatment costs, whose financing mostly comes from  
82 households' out-of-pocket (OOP) spending. [8]

83 The COVID-19 pandemic was also another challenge that disrupted entire societies,  
84 including the routine health care systems in Ethiopia. The comprehensive effort to  
85 contain the pandemic and minimize the subsequent morbidity and mortality has  
86 affected both the continuity and quality of care. [9] During the pandemic, most global  
87 healthcare resources were focused on COVID-19 prevention and control. This  
88 resource reallocation could disrupt the continuum of care for patients with CDs in this  
89 era. Diabetes, chronic obstructive pulmonary disease, hypertension, heart disease,  
90 asthma, cancer, and depression were some of the conditions reported to be most  
91 impacted by the reduction in healthcare resources due to the pandemic. [10]  
92 Resources at all levels have shifted away from CDs management and prevention  
93 during the outbreak, and the lockdown of many services has translated into reduced  
94 access, a decrease in referrals, and reduced hospitalizations of patients with non-  
95 COVID-19 pathology. [11] As the pandemic continues to rapidly spread, attention  
96 often focuses on the numbers of confirmed and probable cases, hospitalizations, and  
97 deaths, which can be called the "direct" effects of the pandemic. However, these

1  
2  
3 98 numbers do not capture the full extent of the pandemic because it has also generated  
4  
5 99 important spillover (indirect) effects by decreasing the supply of and altering patient  
6  
7  
8 100 demand for non-COVID-19-related medical care. [12]  
9

10 101 In Ethiopia, the government declared a state of emergency, labeling the pandemic a  
11  
12 102 national threat and launching overall preventive measures, including advising the  
13  
14 103 community to stay at home, practicing strict and frequent hand washing, and wearing  
15  
16 104 a face mask. Also, it restricted the movement of its people from place to place and  
17  
18 105 laid temporary restrictions on market places, restaurants, shops, cinema houses,  
19  
20 106 religious institutions, and cities. [13] During this time, the number of hospital visits  
21  
22 107 dropped sharply to utilize health services, including CD follow-up. [14] Many studies  
23  
24 108 have revealed the direct impact of COVID-19 on health care provision and utilization.  
25  
26 109 But there has been little emphasis on the impact of the pandemic on the costs of  
27  
28 110 chronic disease follow-up care from a patient perspective. So, the study aimed to  
29  
30 111 determine the impact of the COVID-19 pandemic on the cost of follow-up care among  
31  
32 112 chronic disease patients at public hospitals.  
33  
34  
35  
36

## 37 113 **Methods and Materials**

### 38 114 **Study Design and Setting**

39  
40 115 An institutional-based cross-sectional study design was used to conduct this study. It  
41  
42 116 was conducted from August 1 to 31, 2020, in the three wallaga zones, namely, East  
43  
44 117 Wallaga, West Wallaga, and Horro Guduru Wallaga zones, of Oromia Regional State,  
45  
46 118 Ethiopia. These three Wallaga zones are among the twenty-one zones of the Oromia  
47  
48 119 region and were found in the western direction of the region, Oromia. The capital  
49  
50 120 towns of east Wallaga zone, Nekemte town; west Wallaga zone, Gimbi town; and  
51  
52 121 Horro Guduru Wallaga zone, Shambu town, were located 333km, 441km, and 314km  
53  
54 122 west of Addis Ababa, the capital city of Ethiopia, respectively.  
55  
56  
57  
58  
59  
60

## 123 **Study Participants**

124 All chronic disease patients who visited public hospitals in the Wallaga Zones were  
125 the source population, and all patients who visited the three Wallaga Zones' selected  
126 study hospitals during the study period were the study population.

## 127 **Inclusion and Exclusion Criteria**

128 All patients from the selected CDs in the study area who visited the study hospitals  
129 were included in the study. Patients whose age was less than 15 years old and  
130 without accompanying parents who were seriously ill and unable to respond to the  
131 interviews were excluded from the study.

## 132 **Sample Size and Sampling Methods**

133 The sample size was determined by using the single population mean formula,  
134 applying the following assumptions: two-sided alpha error ( $\epsilon$ ) set at 0.05, 95%  
135 confidence level, mean cost of DM ( $\mu$ ) = 48.99 ETB, and standard deviation (SD) =  
136 30.89 ETB[15], adding a 5% non-response rate.

137 Using the formula,  $n = \frac{(z - \alpha/2)^2 * \sigma^2}{\epsilon^2 \mu^2}$  ..... [16],  $n = 642$ .

138 Among thirteen public hospitals in the study area, data was collected from the  
139 selected CDs of follow-up care patients from Nekemte specialized hospitals, Sire  
140 hospital, Gida hospital, Arjo hospital, Shambu hospital, Guduru hospital, Gimbi  
141 hospital, and Nedjo hospital, which were selected using a simple random sampling  
142 technique.

143 The determined sample size was allocated to each study hospital proportionally  
144 based on the proportion of CD patients who attended follow-up care. Wallaga  
145 University referral hospital was purposely excluded from the study, which was an  
146 isolation and treatment center for COVID-19 during the study period, and four other  
147 hospitals were excluded due to their low CD patient flow.



1  
2  
3 148 Finally, a simple random sampling technique was used from the registration book to  
4  
5 149 sample patients at each study hospital as per their proportion to select 642  
6  
7  
8 150 participants.

### 10 151 **Data Collection**

12 152 The structured questionnaire was developed in English after reviewing relevant  
13  
14 153 literature, and it was translated into Afan Oromo. Data collection and supervision  
15  
16  
17 154 were carried out by eight data collectors, with four supervisors assigned. These data  
18  
19 155 collectors and supervisors were trained before the pre-test and actual data collection  
20  
21 156 started. The questionnaires were pre-tested in Bedele Hospital using 32 (5%) of the  
22  
23  
24 157 determined sample size. It was collected through a face-to-face interview. Patients  
25  
26 158 who completed their chronic outpatient services and returned to leave the study  
27  
28 159 hospitals were interviewed.

### 30 160 **Study Variables**

32  
33 161 **Socio-demographic and economic characteristics, health service costs (non-**  
34  
35 162 **medical costs; transportation, food, accommodation, and income lost, and**  
36  
37 163 **medical costs; registration, consultation, laboratory, radiology, and drugs)**  
38  
39  
40 164 **were assessed and determined.**

#### 42 **Operational Definitions**

43  
44  
45 Before COVID-19: The period before March 13, 2020, when Ethiopia had the first  
46  
47 confirmed COVID-19 positive case.

48  
49 Chronic disease follow-up patients: A patient visited the study hospital for the  
50  
51 follow-up care of one of the following: hypertension (HTN), diabetes mellitus (DM),  
52  
53 heart failure (HF), mental illness, HIV (Human Immune Virus), stroke, epilepsy,  
54  
55 and asthma.

56  
57  
58 Chronic disease: any of the following illnesses that persist over time, can gradually  
59  
60

1  
2  
3  
4 progress, do not resolve spontaneously, and may not be cured: HTN, DM, HF,  
5  
6 mental illness, HIV, stroke, epilepsy, and asthma.[14]  
7

8 Direct costs: the expenditures in ETB spent by chronic disease patients and their  
9  
10 families on the diagnosis and treatment of chronic illness per prescription of  
11  
12 physicians in the study hospitals.  
13

14 During COVID-19: the period after March 13, 2020, when Ethiopia had the first  
15  
16 confirmed COVID-19 positive case.  
17

18 Indirect costs: the number of productive days lost by patients and their families as  
19  
20 a result of chronic illness treatment and care.  
21  
22

23 Medical cost: the cost component of chronic disease patients' follow-up visits at  
24  
25 study hospitals that includes registration, laboratory, radiology, and drug costs.  
26  
27

28 **Non-medical cost:** the cost component that includes transportation, food,  
29  
30 accommodation, and income lost among chronic disease patients during  
31  
32 follow-up visits at study hospitals.  
33  
34  
35

### 36 37 165 **Data Analysis**

38  
39 166 Data was entered into Epi-data version 3.1 and exported to SPSS version 25  
40  
41 167 software for analysis. Descriptive statistics were performed for all study variables  
42  
43 168 based on their characteristics. The bottom-up costing approach was used to  
44  
45 169 estimate the direct cost of the follow-up visit with respect to the patient's perspective,  
46  
47 170 and the indirect costs (income lost due to productive time lost) were estimated using  
48  
49 171 earnings lost both before and during the COVID-19 pandemic. [17] The time  
50  
51 172 foregone and productive time lost were converted into indirect costs based on the  
52  
53 173 daily wage rate and then multiplied by the number of working days lost. The daily  
54  
55 174 wage rate for patients was estimated by dividing their monthly income by 30 days for  
56  
57  
58  
59 175 both patients and caregivers. [17] All costs included in the analysis were measured in  
60

1  
2  
3 176 terms of Ethiopian Birr (ETB) and were converted to US\$(US dollar) during the  
4  
5 177 analysis, and the average currency exchange rate was (August 2020; 1 US\$ = 35.99  
6  
7  
8 178 *ETB*).

9  
10 179 Finally, the normality distribution of treatment cost data was checked, and it was not  
11  
12 180 normally distributed. As a result, non-parametric tests were used to analyze the  
13  
14 181 median cost for each cost category, as well as a 2-paired sample Wilcoxon sign rank  
15  
16 182 test to compare the costs incurred before and during the pandemic lockdown, with  
17  
18  
19 183 the level of significance of the median cost difference set at  $p < 0.05$ .

### 21 184 **Ethical consideration**

22  
23  
24 185 An appropriate research ethical approval was obtained from the ethical review board  
25  
26 186 of Wallaga University, Institute of Health Sciences (Reference number:  
27  
28 187 IRB/233/2020). The study was conducted in accordance with the Declaration of  
29  
30  
31 188 Helsinki. The questionnaire was designed to be anonymous, and the result did not  
32  
33 189 identify the personalities of the respondents; rather, it was presented in the  
34  
35 190 aggregated statistics. Written consent was obtained from the study participants. The  
36  
37  
38 191 data was kept in protected and safe locations. Paper-based data was kept in a  
39  
40 192 locked cabinet, and computer-based data was password-secured. Data sharing was  
41  
42 193 enacted based on the ethical and legal rules of data sharing, and it was not  
43  
44  
45 194 accessed by a third party except the research teams.

### 47 195 **Patient and Public Involvement**

48  
49 196 None  
50  
51  
52  
53  
54  
55  
56  
57  
58  
59  
60

## 197 Results

### 198 Socio-demographic Characteristics

199 A total of 642 patients were included in the study, among whom 605 responded to  
 200 the interview, yielding a 94.2% response rate. An almost equal number of males and  
 201 females participated in the study. More than half of the participants, 352 (58.2%),  
 202 were from urban areas, and the majority of them, 421 (69.6%), were married.

203 Regarding the educational status of the participants, 137 (22.6%) were illiterates  
 204 (Table 1). The average participant's age was 43.29 (SD=16.5) years, the average  
 205 monthly income was 84.32 (SD=70.65) US dollars, and the average household size  
 206 was 4.46 (SD=3.43).

207 Table 1: Socio-demographic characteristics and classification of study participants by  
 208 chronic diseases conditions in the public hospitals of the three Wallaga zones,  
 209 Oromia National Regional State, Ethiopia 2020 (N= 605)

| Characteristics (N= 605) |           | Frequency (n) | Percentage (%) |
|--------------------------|-----------|---------------|----------------|
| Sex                      | Male      | 302           | 49.9           |
|                          | Female    | 303           | 50.1           |
| Residence place          | Urban     | 352           | 58.2           |
|                          | Rural     | 253           | 41.8           |
| Marital status           | Single    | 130           | 21.5           |
|                          | Married   | 421           | 69.6           |
|                          | Separated | 7             | 1.2            |
|                          | Divorced  | 2             | 0.3            |
|                          | Widowed   | 45            | 7.4            |
| Religion                 | Orthodox  | 165           | 27.3           |

|                           |                     |     |      |
|---------------------------|---------------------|-----|------|
|                           | Muslim              | 59  | 9.8  |
|                           | Protestant          | 373 | 61.7 |
|                           | Others              | 8   | 1.3  |
| Ethnic group              | Oromo               | 552 | 91.2 |
|                           | Amhara              | 48  | 7.9  |
|                           | Gurage              | 4   | 0.7  |
|                           | Tigre               | 1   | 0.2  |
| Educational status        | Illiterate          | 137 | 22.6 |
|                           | Read & Write        | 102 | 16.9 |
|                           | Grade 1-8           | 99  | 16.4 |
|                           | Grade 9-8           | 151 | 25.0 |
|                           | Diploma and above   | 116 | 19.2 |
| Employment status         | Government employee | 93  | 15.4 |
|                           | NGO* employee       | 89  | 14.7 |
|                           | Merchant            | 100 | 16.5 |
|                           | Housewife           | 114 | 18.8 |
|                           | Farmer              | 107 | 17.7 |
|                           | Others**            | 102 | 16.9 |
| Types of Chronic diseases | Hypertension        | 214 | 35.4 |
|                           | Diabetic mellitus   | 173 | 28.6 |
|                           | Heart failure       | 62  | 10.2 |
|                           | Mental disease      | 51  | 8.4  |
|                           | HIV/AIDS            | 50  | 8.3  |
|                           | Asthma              | 29  | 4.8  |

|  |          |    |     |
|--|----------|----|-----|
|  | Epilepsy | 18 | 3.0 |
|  | Stroke   | 3  | 0.5 |

210 \*NGO= non-governmental organization, \*\* Daily laborer, students

### 211 **The Overall Cost of CD Follow-up Care before and during the Pandemic**

212 The total cost for the treatment of CDs before the COVID-19 pandemic among  
 213 patients who incurred any one or more types of cost was on average 10.41 (SD =  
 214 10.19) US dollars, with the median cost of 9.76 (IQR = 8.64) US dollars among 600  
 215 patients before the pandemic. The total cost of the treatment of the diseases per  
 216 follow-up visit during the pandemic among 593 patients was 13.02 (SD = 11.22) US  
 217 dollars, and the median cost was 12.27 (IQR = 10.40) US dollars.

218 The median income lost due to productivity time lost for the treatment of CDs before  
 219 the pandemic was 1.48 (IQR = 2.71 US dollars) among the 501 participants who had  
 220 income, which was almost similar to the income lost when visiting the study hospitals  
 221 during the pandemic, which was 1.40 (IQR = 2.85 US dollars).

222 The total median non-medical cost incurred for the follow-up care was 6.05 (IQR =  
 223 5.55) US dollars before the pandemic among 463 patients and 7.98 (IQR = 7.50) US  
 224 dollars among the same number of patients during the pandemic.

225 The total median transportation cost to travel to hospitals and travel back to their  
 226 homes was 1.141 (IQR = 1.94) US dollars before the pandemic and 2.29 (IQR =  
 227 3.05) US dollars during the pandemic among the 430 patients who paid for  
 228 transportation.

229 The total median cost incurred for the accommodation and food during the follow-up  
 230 visit was 3.43 (IQR = 4.91) US dollars before the pandemic and 4.29 (IQR = 633) US  
 231 dollars during the pandemic among 199 participants.

232 The total median medical cost was 3.71 (IQR = 5.22) US dollars before the  
 233 pandemic, whereas it was 4.29 (IQR = 5.91) US dollars during the pandemic hospital  
 234 visit among the 425 participants who paid for the prescribed drugs (Table 2).

235 Table 2: The overall cost of chronic diseases follow-up treatment and care before and  
 236 during the pandemic among chronic diseases patients at public hospitals in the three  
 237 Wallaga zones, Oromia National Regional state, Ethiopia 2020(N= 605)

| Cost Categories                        | Era of COVID-19 Pandemic | Observation-on (N) | Mean(SD)     | Median (IQR) | Significance level of median cost difference (During-Before covid-19) |
|----------------------------------------|--------------------------|--------------------|--------------|--------------|-----------------------------------------------------------------------|
| (a) Income lost                        | Before                   | 501                | 2.27(2.75)   | 1.48(2.71)   | Z = 1.780,<br>p = 0.075                                               |
|                                        | During                   | 501                | 2.25(2.72)   | 1.40(2.85)   |                                                                       |
| (b) Transportation                     | Before                   | 430                | 1.91(2.13)   | 1.14(1.94)   | Z = 8.028,<br>p = 0.001                                               |
|                                        | During                   | 430                | 3.43(4.42)   | 2.29(3.05)   |                                                                       |
| (c) Food and accommodation             | Before                   | 199                | 4.67(5.05)   | 3.43(4.91)   | Z = 1.189,<br>p = 0.169                                               |
|                                        | During                   | 199                | 5.6(5.94)    | 4.29(6.33)   |                                                                       |
| Total nonmedical cost (a+b+c) = (d)    | Before                   | 463                | 4.58(5.35)   | 6.05(5.55)   | Z = 4.903,<br>p = 0.001                                               |
|                                        | During                   | 463                | 6.81(7.58)   | 7.98(7.50)   |                                                                       |
| Total medical cost (e)                 | Before                   | 425                | 5.51(8.43)   | 3.71(5.22)   | Z = 2.382,<br>p = 0.017                                               |
|                                        | During                   | 425                | 5.93(7.81)   | 4.29(5.91)   |                                                                       |
| Total cost per patient per visit (d+e) | Before                   | 600                | 10.41(10.19) | 9.76(8.64)   | Z = 5.05,<br>p=0.001                                                  |
|                                        | During                   | 593                | 13.02(11.22) | 12.27(10.40) |                                                                       |

238 Note: 1US\$ = 35.99 ETB, August, 2020; SD: Standard Deviation; IQR: Interquartile  
 239 Range

### 240 **Cost Difference Based on COVID-19 Pandemic**

241 There was a significant median cost difference (n = 593, Z = 5.05, p = 0.001)  
242 between the cost of follow-up care during the COVID-19 pandemic lockdown and the  
243 costs incurred before the pandemic (Table 3). This showed that 348 out of 593  
244 (58.7%) patients incurred significantly higher costs during the pandemic compared to  
245 before the pandemic. The median cost of follow-up care during the pandemic was  
246 12.27 (IQR = 10.40) US dollars, compared to 9.76 (IQR = 8.64) US dollars before the  
247 COVID-19 pandemic.

248 The study showed that there was no significant median difference in income lost  
249 among patients who had income during and before the pandemic (n = 501, Z =  
250 1.780, p = 0.075). The median income lost during the pandemic was 1.48 (IQR =  
251 2.71 US dollars) compared to the income lost before the pandemic, which was 1.40  
252 (IQR = 2.85 US dollars).

253 There was a significant median cost difference in non-medical costs per patient  
254 during and before the pandemic (n = 463, Z = 4.903, p = 0.001). This showed  
255 significantly higher costs were incurred by more than half of the patients, 276  
256 (59.61%), during the pandemic compared to before the pandemic. The median non-  
257 medical cost observed among the patients was 7.98 (IQR = 7.50) and 6.05 (IQR =  
258 5.55) US dollars per follow-up visit during and before the pandemic, respectively.

259 The study revealed that there was no statistical significance in the median cost  
260 difference of food and accommodation incurred during and before the pandemic (n =  
261 199, Z = 1.189, p = 0.169), and the median of this cost category was 4.29 (IQR =  
262 6.33) and 3.13 (IQR = 4.91) US dollars during and before the pandemic lock-down,  
263 respectively.



1  
2  
3 264 The majority of the patients, 289 (67.2%), paid higher transportation fees when they  
4  
5 265 visited hospitals during the pandemic compared to before the pandemic. There was  
6  
7  
8 266 a significant median cost difference in transportation costs during and before the  
9  
10 267 pandemic ( $n = 430$ ,  $Z = 8.028$ ,  $p = 0.00$ ), which was explained by the fact that the  
11  
12 268 median transportation cost was 1.14 (IQR = 1.94) US dollars and 2.29 (IQR = 3.05)  
13  
14 269 US dollars during and before the pandemic, respectively.

16  
17 270 More than half of the patients, 236 (55.5%), incurred higher costs for medical  
18  
19 271 services during the pandemic compared to before the pandemic. There was a  
20  
21 272 significant median cost difference during and before the pandemic ( $n = 425$ ,  $Z =$   
22  
23 273  $2.382$ ,  $p = 0.017$ ), in which the median cost was 4.29 (IQR = 5.91) and 3.71 (IQR =  
24  
25 274  $5.22$ ) US dollars during and before the pandemic lockdown.

26  
27  
28 275 The study showed that the majority of the hypertensive (HTN) patients, 128 (60.7%),  
29  
30 276 paid a high amount of money during the pandemic compared to before the pandemic  
31  
32 277 among the 211 patients who paid for the services. There was a significant median  
33  
34 278 cost difference per visit during and before the pandemic ( $n = 211$ ,  $Z = 3.632$ ,  $p =$   
35  
36 279  $0.00$ ). The median cost observed among these patients was 7.58 (IQR = 7.53) and  
37  
38 280  $10.14$  (IQR = 8.74) US per follow-up visit before and during the pandemic,  
39  
40 281 respectively.

41  
42  
43 282 More than half of diabetes mellitus (DM) patients (59.17%) paid higher costs for  
44  
45 283 services during the pandemic compared to before the pandemic. The total cost  
46  
47 284 incurred by these patients was significantly higher during the pandemic compared to  
48  
49 285 before the pandemic ( $n = 169$ ,  $Z = 3.095$ ,  $p = 0.002$ ). The median cost was 11.39  
50  
51 286 (IQR = 10.87) and 8.11 (IQR = 9.26) US dollars during and before the pandemic  
52  
53 287 lockdown, respectively.  
54  
55  
56  
57  
58  
59  
60

1  
2  
3 288 The study revealed that there was no statistical significance in the median difference  
4  
5 289 in total cost incurred by heart failure (HF) patients during and before the pandemic  
6  
7  
8 290 era (n = 61, Z = -0.055, p = 0.956). Among 61 HF patients, only 31 (50.82%) paid a  
9  
10 291 higher amount of money during the pandemic compared to before the pandemic.

11  
12 292 Similarly, there was no statistical significance in the median difference in total cost  
13  
14 293 incurred by patients who visited the hospitals for mental health follow-up for the  
15  
16  
17 294 treatment of diseases during and before the pandemic era (n = 41, Z = -1.497, p =  
18  
19 295 0.134). Among 41 patients, only 20 (40.82%) paid a higher amount of money during  
20  
21 296 the pandemic.

22  
23  
24 297 The study also showed that there was a statistically significant median difference in  
25  
26 298 total cost incurred by HIV patients during and before the pandemic lockdown (n = 49,  
27  
28 299 Z = 3.356, p = 0.00). Among 49 patients, the majority of them 34(69.39%) incurred a  
29  
30 300 higher cost per visit during the pandemic compared to before the pandemic  
31  
32 301 lockdown.

33  
34  
35 302 There was no statistical significance in the median difference in total cost incurred by  
36  
37 303 asthma patients during and before the pandemic era (n = 28, Z = 1.731, p = 0.184).

38  
39 304 Similarly, there was no statistically significant median difference in total cost incurred  
40  
41  
42 305 by epilepsy patients during and before the pandemic lockdown (n = 18, Z = 1.328, p  
43  
44 306 = 0.184) (Table 3).

45  
46  
47 307 Table 3: Cost of chronic diseases follow-up treatment and care by disease types  
48  
49 308 among chronic disease patients at public hospitals in the three Wallaga zones,  
50  
51 309 Oromia National Regional state, Ethiopia 2020(N= 605)

| Types of CDs   | Era of COVID-19 Pandemic | Observation (N) | Mean(SD)     | Median (IQR) | Significance level of median cost difference(During- Before covid-19) |
|----------------|--------------------------|-----------------|--------------|--------------|-----------------------------------------------------------------------|
| HTN            | Before                   | 211             | 10.03(11.86) | 7.58(7.53)   | $Z = 3.632,$<br>$p = 0.001$                                           |
|                | During                   | 211             | 12.65(10.42) | 10.14(8.74)  |                                                                       |
| DM             | Before                   | 169             | 10.64(8.42)  | 8.12(9.26)   | $Z = 3.095,$<br>$p = 0.002$                                           |
|                | During                   | 169             | 13.56(10.49) | 11.39(10.87) |                                                                       |
| HF             | Before                   | 61              | 12.64(12.85) | 9.06(8.53)   | $Z = -0.055,$<br>$p = 0.956$                                          |
|                | During                   | 61              | 12.51(11.34) | 8.2(12.52)   |                                                                       |
| Mental disease | Before                   | 49              | 13.08(8.97)  | 11.63(10.10) | $Z = -1.497,$<br>$p = 0.134$                                          |
|                | During                   | 49              | 10.91(8.45)  | 8.86(10.24)  |                                                                       |
| HIV            | Before                   | 49              | 7.37(6.65)   | 6.12(6.76)   | $Z = 3.356,$<br>$p = 0.000$                                           |
|                | During                   | 49              | 16.58(18.32) | 12.24(14.25) |                                                                       |
| Asthma         | Before                   | 28              | 8.95(6.40)   | 7.33(10.68)  | $Z = 1.731,$<br>$p = 0.184$                                           |
|                | During                   | 28              | 12.92(12.34) | 10.34(8.18)  |                                                                       |
| Epilepsy       | Before                   | 18              | 7.70(7.01)   | 5.70(11.18)  | $Z = 1.328,$<br>$p = 0.184$                                           |
|                | During                   | 18              | 10.44(5.74)  | 10.00(9.84)  |                                                                       |

310 Note: 1US\$ = 35.99 ETB, August, 2020; SD: Standard Deviation; IQR: Interquartile  
311 Range

## 312 Discussion

313 This study was aimed at determining the impact of the COVID-19 pandemic on the  
314 cost of chronic disease treatment and care at public hospitals in Wallaga Zones,

1  
2  
3 315 Oromia Regional State, Ethiopia. The study found that the cost of follow-up  
4  
5 316 treatment and care among chronic disease patients during the COVID-19 pandemic  
6  
7  
8 317 was significantly higher compared to before the pandemic era.

9  
10 318 This indicated that more than half of the chronic patients, 58.7%, incurred a  
11  
12 319 significantly higher total cost during the pandemic lockdown compared to before the  
13  
14 320 pandemic. This finding supports the study's findings that chronic illness costs  
15  
16 321 account for more than 75% of total healthcare costs in high-income countries. [18,  
17  
18 322 19] However, this study was conducted during the COVID-19 pandemic and in a low-  
19  
20 323 income country, but these studies were not conducted at the time of the pandemic  
21  
22 324 and were also conducted in high-income countries. During the pandemic, most  
23  
24 325 global healthcare resources are focused on COVID-19, and this resource  
25  
26 326 reallocation could disrupt the continuum of care for patients with CDs. [9, 10, 20]  
27  
28 327 This could be explained by the fact that the global pandemic's disruption of the  
29  
30 328 health care system may impose additional costs on CD patients.

31  
32  
33 329 The study revealed that the non-medical cost during the follow-up visit per patient  
34  
35 330 during the era of COVID-19 was significantly higher than the cost incurred before the  
36  
37 331 pandemic era by the same patients, which was doubled during the pandemic. This  
38  
39 332 significant difference might be due to a strict lockdown that could affect these  
40  
41 333 patients adversely as they require regular follow-up visits that lead to further health  
42  
43 334 consequences and additional costs. [21,22]

44  
45 335 Transportation costs were one of the cost categories that doubled during the  
46  
47 336 pandemic compared to before the pandemic. The median cost per patient per visit of  
48  
49 337 this cost category during the pandemic era was significantly increased by two folds.  
50  
51 338 This could be due to the fact that the government restricted the movement of its  
52  
53  
54  
55  
56  
57  
58  
59  
60

1  
2  
3 339 people from place to place and laid a temporary restriction on public transport across  
4  
5 340 regions and cities. [13, 21]  
6

7  
8 341 The study discovered a significant median cost difference in medical costs, with the  
9  
10 342 median of this cost category increasing by 15.6% during the pandemic. This finding  
11  
12 343 is in line with the study report that revealed that before the pandemic, one in three  
13  
14 344 Americans did not take their medications as prescribed because of high costs, but  
15  
16 345 during a global pandemic, forgoing medications involves even more risks for chronic  
17  
18 346 care patients and incurs even higher costs in the long run. [23] However, comparing  
19  
20 347 study findings in this study setting with those in a high-resource setting is taken as a  
21  
22 348 weakness of this study.  
23

24  
25  
26 349 The study also evaluated the cost of each selected chronic disease. Accordingly, for  
27  
28 350 the follow-up care of HTN patients, the patients incurred significantly higher costs  
29  
30 351 during the pandemic compared to before the pandemic, which were raised by  
31  
32 352 33.76% during the pandemic. The cost incurred before the COVID pandemic was  
33  
34 353 almost comparable with other study reports, but the cost incurred during the  
35  
36 354 pandemic was higher than the study report on the cost of hypertension before the  
37  
38 355 COVID-19 lockdown in Ethiopia. [24]  
39

40  
41  
42 356 Again, the study showed that the cost of DM follow-up visits per patient during the  
43  
44 357 pandemic lockdown was significantly higher than the cost incurred before the  
45  
46 358 pandemic, which was increased by 40.53%. However, before and during the COVID-  
47  
48 359 19 lockdown, the cost of DM in this study was lower than the study reported in  
49  
50 360 Ethiopia. [15, 25] This variation could be attributed to differences in DM  
51  
52 361 complications and treatment among study participants.  
53

54  
55  
56 362 Despite HIV care and treatment being an exempted service in Ethiopia, patients  
57  
58 363 incurred nonmedical costs. The study revealed that the cost incurred by HIV patients  
59  
60

1  
2  
3 364 for follow-up treatment and care per visit per patient during the pandemic lock-down  
4  
5 365 was significantly higher than the cost incurred before the pandemic, which was  
6  
7  
8 366 increased by two folds. The cost of HIV treatment and care reported in the study was  
9  
10 367 higher than in other Ethiopian studies. [26, 27]

11  
12 368 However, there was no significant statistical median cost difference for the follow-up  
13  
14 369 care of heart failure, mental illness, asthma, and epilepsy during and before the  
15  
16  
17 370 pandemic; a slight median cost difference was observed during and before the  
18  
19 371 pandemic.

## 21 372 **Conclusion**

22  
23  
24 373 This study revealed that the total cost of follow-up care among chronic disease  
25  
26 374 patients during the COVID-19 pandemic lockdown was significantly higher compared  
27  
28  
29 375 to before the pandemic era among the same patients. In this study, hypertensive  
30  
31 376 patients had the greatest impact on the cost of ongoing care as a result of the  
32  
33 377 COVID-19 pandemic. A comprehensive package of chronic disease treatment and  
34  
35 378 care is demanded at different levels of health facilities in the country's health system.  
36  
37  
38 379 Therefore, healthcare providers, hospital administrators, and the local government  
39  
40 380 should arrange special fee waiver mechanisms for chronic disease healthcare costs  
41  
42 381 during such types of pandemics and provide the services at proximal health facilities.

## 44 382 **Declarations**

## 46 383 **Author's Contribution Statement**

47  
48  
49 384 All authors made substantial contributions to conception and design, acquisition of  
50  
51 385 data, or analysis and interpretation of data; took part in drafting the article or revising  
52  
53 386 it critically for important intellectual content; gave final approval of the version to be  
54  
55  
56 387 published; and agreed to be accountable for all aspects of the work.

## 58 59 388 **Conflict of Interest Statement**

1  
2  
3 389 All authors declared that they have no conflicts of interest related to this work.  
4

5 390 **Consent for Publication**

6  
7 391 NA  
8  
9

10 392 **Availability of Data and Materials**

11  
12 393 All the data supporting the study's findings are within the manuscript. Additional  
13  
14 394 detailed information and raw data will be shared upon request addressed to the  
15  
16 395 corresponding author.  
17  
18

19 396 **Funding**

20  
21 397 This research received no specific grant from any funding agency in the public,  
22  
23 398 commercial, or not-for-profit sectors.  
24  
25

26 399 **Acknowledgments**

27  
28 400 Researchers would like to acknowledge all participants in the study and respective  
29  
30 401 administrative bodies from top to bottom for their due cooperation and involvement.  
31  
32

33 402 **Acronyms**

34  
35 403 ETB: Ethiopian Birr, HF: Heart Failure, HIV: Human Immune Virus, HTN:  
36  
37 404 Hypertension, LMICs: Low-and-middle-income countries, NCDs: Non-communicable  
38  
39 405 diseases, OOP: Out-of-pocket, WHO: World Health Organization  
40  
41

42 406 **References**

43  
44 407 [1]. World Health Organization. A guide to implementation research in the prevention  
45  
46 408 and control of Non-communicable diseases. Geneva; Switzerland World Health  
47  
48 409 Organization; 2016.

49  
50  
51 410 [2].World Health Organization. Overview preventing chronic diseases: a vital  
52  
53 411 investment. Switzerland: 2004.

54  
55 412 [3].The World Bank. Human Development Network. The growing danger of non-  
56  
57 413 communicable diseases. Acting now to reverse course; 2011.  
58  
59  
60

- 1  
2  
3 414 [4].Santosa, A, Byass, P. Diverse empirical evidence on epidemiological transition in  
4  
5 415 low-and middle-income countries: population-based findings from INDEPTH network  
6  
7 416 data. PLoS One 2016; 11, e0155753.  
8  
9  
10 417 [5].World Health Organization. The double burden: Emerging epidemics and  
11  
12 418 persistent problems. World Health Report; 1999.  
13  
14 419 [6].Murray, C. J., Lopez, A. D. The global burden of disease: a comprehensive  
15  
16 420 assessment of mortality and disability from diseases, injuries, and risk factors in  
17  
18 421 1990 and projected to 2020: summary. Harvard School of Public Health on behalf of  
19  
20 422 the World Health Organization and the World Bank; 1996.  
21  
22  
23 423 [7].Bollyky, T. J., Templin, T., Cohen, M., et al. Lower-income countries that face the  
24  
25 424 most rapid shift in non-communicable disease burden are also the least prepared.  
26  
27 425 Health Aff. 2017: 36, 1866–1875.  
28  
29  
30 426 [8].Engelgau MM, El-Saharty S, Kudesia P, et al. Capitalizing on the demographic  
31  
32 427 transition: tackling non-communicable diseases in South Asia: The World Bank;  
33  
34 428 2011.  
35  
36  
37 429 [9].World Health Organization. Information note on COVID-19 and non-  
38  
39 430 communicable diseases. Available at: [https://www.who.int/publications/m/item/  
40  
41 covid-19-and-ncds](https://www.who.int/publications/m/item/covid-19-and-ncds) Accessed on July 21, 2020.  
42  
43  
44 432 [10].Yogini V, Clare L, Francesco Z, et al. Impact of COVID-19 on routine care for  
45  
46 433 chronic diseases: A global survey of views from healthcare professionals; 2020.  
47  
48  
49 434 [11].Fagan M. Huge fall in non-Covid hospital admissions and attendances. Irish  
50  
51 435 Examiner; 2020.  
52  
53  
54 436 [12].Julian C, Rebecca McG. Spillover Effects of the COVID-19 Pandemic Could  
55  
56 437 Drive Long-Term Health Consequences for Non-COVID-19 Patients. Health Affairs;  
57  
58 438 2020.  
59  
60



- 1  
2  
3 439 [13].Strategic Partnership for International Health Regulations and Health Security  
4  
5 440 school of public health: COVID-19 Preparedness Bulletin Ethiopia; 2020. Available  
6  
7 441 at: <https://extranet.who.int/sph/news/covid-19-preparedness-bulletin-ethiopia>.  
8  
9  
10 442 [14].Tamirat MA, Workeabeba A, Alemayehu W, et al. The Impact of COVID-19 on  
11  
12 443 Care Seeking Behavior of Patients at Tertiary Care Follow-up Clinics: A Cross-  
13  
14 444 Sectional Telephone Survey. Addis Ababa, Ethiopia; 2020. medRxiv preprint doi:  
15  
16 445 <https://doi.org/10.1101/2020.11.25.20236224>; 2020.  
17  
18  
19 446 [15].Alemu Z, Workneh BD, Mohammed SA, et al. Economic Assessment of Direct  
20  
21 447 Cost of Illness of Diabetes Mellitus at Dessie Referral Hospital, North East  
22  
23 448 Ethiopia.2020. Int J Diabetes Clin Res 7:122. doi.org/10.23937/2377-3634/1410122  
24  
25  
26 449 [16].Stanley L, David W. Hosmer Jr, et al. Adequacy of Sample Size in Health  
27  
28 450 Studies. World Health Organization. 1990; pp36-39.  
29  
30  
31 451 [17].Abhijit P. Health Economic Evaluation Methods Techniques. IOSR Journal of  
32  
33 452 Economics and Finance (IOSR-JEF). 2016; 7:1-9.  
34  
35 453 [18].Glynn LG., Valderas JM., Healy P., et al. The prevalence of multimorbidity in  
36  
37 454 primary care and its effect on health care utilization and cost. J of Family Pract.  
38  
39 455 2011; 28:516–23.  
40  
41  
42 456 [19].Nuno R., Coleman K., Bengoa R., et al. Integrated care for chronic conditions:  
43  
44 457 the contribution of the ICCC Framework. Health Policy 2012; 105:55–64.  
45  
46  
47 458 [20].Baird B. How has general practice responded to the Covid-19 (coronavirus)  
48  
49 459 outbreak? The `Kings Fund. Available at:[https://www.kingsfund.org.uk/blog/2020/](https://www.kingsfund.org.uk/blog/2020/04/covid-19-general-practice)  
50  
51 460 [04/covid-19-general-practice](https://www.kingsfund.org.uk/blog/2020/04/covid-19-general-practice). Accessed on June 25, 2020.  
52  
53  
54 461 [21].Finet P, Le Bouquin Jeannes R, Dameron O, et al. Review of current  
55  
56 462 telemedicine applications for chronic diseases. Toward a more integrated system?  
57  
58 463 Irbm 2015;36.  
59  
60

- 1  
2  
3 464 [22].French J.A., Brodie M.J., Caraballo R., et al. Keeping people with epilepsy safe  
4  
5 465 during the Covid-19 pandemic. *Neurology*. 2020; 94:1032–1037. doi:  
6  
7 466 10.1212/WNL.00000000000009632.  
8  
9  
10 467 [23].Valenz. The Effects of COVID-19 on Chronic Disease Management and Five  
11  
12 468 Solutions Insurers Should Embrace; 2020.  
13  
14 469 [24].Zawudie AB, Lemma TD, Daka DW. Cost of Hypertension Illness and  
15  
16 470 Associated Factors among Patients Attending Hospitals in Southwest Shewa Zone,  
17  
18 471 Oromia Regional State, Ethiopia. *ClinicoEconomics and Outcomes Research*  
19  
20 472 2020:12 201–211.  
21  
22  
23  
24 473• [25].Samson O, Amarech G, Mulugeta T, et al. economic burden of diabetes mellitus  
25  
26 474 to diabetic patients and their families attending health facilities in Addis ababa.2020.  
27  
28 475 *Ethiopian Medical Journal* 58(3).  
29  
30  
31 476• [26].Berman, P; Alebachew, A; Mann, C; Agarwal, A; Abdella, E. 2016. Costs of  
32  
33 477 Publicly Funded Primary Hospitals, Departments, and Exempted Services in Ethiopia  
34  
35 478 Supplement to Paper 1 with expanded sample of primary hospitals. Harvard T.H.  
36  
37 479 Chan School of Public Health; Breakthrough International Consultancy, PLC: Boston,  
38  
39 480 Massachusetts and Addis Ababa, Ethiopia.  
40  
41  
42 481• [27].Asfaw DB, Degu J, Bjarne R, et al. Cost estimates of HIV care and treatment  
43  
44 482 with and without anti-retroviral therapy at Arba Minch Hospital in southern Ethiopia.  
45  
46 483 Cost Effectiveness and Resource Allocation 2009, 7:6 doi:10.1186/1478-7547-7-6.  
47  
48  
49  
50  
51  
52  
53  
54  
55  
56  
57  
58  
59  
60

**STROBE 2007 (v4) Statement—Checklist of items that should be included in reports of *cross-sectional studies***

| Section/Topic                | Item # | Recommendation                                                                                                                                                                       | Reported on page # |
|------------------------------|--------|--------------------------------------------------------------------------------------------------------------------------------------------------------------------------------------|--------------------|
| <b>Title and abstract</b>    | 1      | (a) Indicate the study's design with a commonly used term in the title or the abstract                                                                                               | 1                  |
|                              |        | (b) Provide in the abstract an informative and balanced summary of what was done and what was found                                                                                  | 2                  |
| <b>Introduction</b>          |        |                                                                                                                                                                                      |                    |
| Background/rationale         | 2      | Explain the scientific background and rationale for the investigation being reported                                                                                                 | 3-4                |
| Objectives                   | 3      | State specific objectives, including any prespecified hypotheses                                                                                                                     | 2                  |
| <b>Methods</b>               |        |                                                                                                                                                                                      |                    |
| Study design                 | 4      | Present key elements of study design early in the paper                                                                                                                              | 5                  |
| Setting                      | 5      | Describe the setting, locations, and relevant dates, including periods of recruitment, exposure, follow-up, and data collection                                                      | 5                  |
| Participants                 | 6      | (a) Give the eligibility criteria, and the sources and methods of selection of participants                                                                                          | 6                  |
| Variables                    | 7      | Clearly define all outcomes, exposures, predictors, potential confounders, and effect modifiers. Give diagnostic criteria, if applicable                                             | 7                  |
| Data sources/<br>measurement | 8*     | For each variable of interest, give sources of data and details of methods of assessment (measurement). Describe comparability of assessment methods if there is more than one group | -                  |
| Bias                         | 9      | Describe any efforts to address potential sources of bias                                                                                                                            | -                  |
| Study size                   | 10     | Explain how the study size was arrived at                                                                                                                                            | 6                  |
| Quantitative variables       | 11     | Explain how quantitative variables were handled in the analyses. If applicable, describe which groupings were chosen and why                                                         | 8                  |
| Statistical methods          | 12     | (a) Describe all statistical methods, including those used to control for confounding                                                                                                | 8                  |
|                              |        | (b) Describe any methods used to examine subgroups and interactions                                                                                                                  | -                  |
|                              |        | (c) Explain how missing data were addressed                                                                                                                                          | 8                  |
|                              |        | (d) If applicable, describe analytical methods taking account of sampling strategy                                                                                                   | -                  |
|                              |        | (e) Describe any sensitivity analyses                                                                                                                                                | -                  |
| <b>Results</b>               |        |                                                                                                                                                                                      |                    |

|                          |     |                                                                                                                                                                                                              |       |
|--------------------------|-----|--------------------------------------------------------------------------------------------------------------------------------------------------------------------------------------------------------------|-------|
| Participants             | 13* | (a) Report numbers of individuals at each stage of study—eg numbers potentially eligible, examined for eligibility, confirmed eligible, included in the study, completing follow-up, and analysed            | -     |
|                          |     | (b) Give reasons for non-participation at each stage                                                                                                                                                         | -     |
|                          |     | (c) Consider use of a flow diagram                                                                                                                                                                           | -     |
| Descriptive data         | 14* | (a) Give characteristics of study participants (eg demographic, clinical, social) and information on exposures and potential confounders                                                                     | 8     |
|                          |     | (b) Indicate number of participants with missing data for each variable of interest                                                                                                                          | -     |
| Outcome data             | 15* | Report numbers of outcome events or summary measures                                                                                                                                                         | -     |
| Main results             | 16  | (a) Give unadjusted estimates and, if applicable, confounder-adjusted estimates and their precision (eg, 95% confidence interval). Make clear which confounders were adjusted for and why they were included | -     |
|                          |     | (b) Report category boundaries when continuous variables were categorized                                                                                                                                    | -     |
|                          |     | (c) If relevant, consider translating estimates of relative risk into absolute risk for a meaningful time period                                                                                             | -     |
| Other analyses           | 17  | Report other analyses done—eg analyses of subgroups and interactions, and sensitivity analyses                                                                                                               | -     |
| <b>Discussion</b>        |     |                                                                                                                                                                                                              |       |
| Key results              | 18  | Summarise key results with reference to study objectives                                                                                                                                                     | 12-14 |
| Limitations              | 19  | Discuss limitations of the study, taking into account sources of potential bias or imprecision. Discuss both direction and magnitude of any potential bias                                                   | 15    |
| Interpretation           | 20  | Give a cautious overall interpretation of results considering objectives, limitations, multiplicity of analyses, results from similar studies, and other relevant evidence                                   | -     |
| Generalisability         | 21  | Discuss the generalisability (external validity) of the study results                                                                                                                                        | -     |
| <b>Other information</b> |     |                                                                                                                                                                                                              |       |
| Funding                  | 22  | Give the source of funding and the role of the funders for the present study and, if applicable, for the original study on which the present article is based                                                | 16    |

\*Give information separately for cases and controls in case-control studies and, if applicable, for exposed and unexposed groups in cohort and cross-sectional studies.

**Note:** An Explanation and Elaboration article discusses each checklist item and gives methodological background and published examples of transparent reporting. The STROBE checklist is best used in conjunction with this article (freely available on the Web sites of PLoS Medicine at <http://www.plosmedicine.org/>, Annals of Internal Medicine at <http://www.annals.org/>, and Epidemiology at <http://www.epidem.com/>). Information on the STROBE Initiative is available at [www.strobe-statement.org](http://www.strobe-statement.org).

# BMJ Open

## Impact of the COVID-19 pandemic on the cost of chronic diseases treatment and care at public hospitals in Wallaga zones, Oromia Regional State, Ethiopia: A hospital-based, cross-sectional study

|                                 |                                                                                                                                                                                                                                                                                                                                                                                                                                                                                                                                                                                                                                                                                                                                                                                                                                    |
|---------------------------------|------------------------------------------------------------------------------------------------------------------------------------------------------------------------------------------------------------------------------------------------------------------------------------------------------------------------------------------------------------------------------------------------------------------------------------------------------------------------------------------------------------------------------------------------------------------------------------------------------------------------------------------------------------------------------------------------------------------------------------------------------------------------------------------------------------------------------------|
| Journal:                        | <i>BMJ Open</i>                                                                                                                                                                                                                                                                                                                                                                                                                                                                                                                                                                                                                                                                                                                                                                                                                    |
| Manuscript ID                   | bmjopen-2022-070195.R3                                                                                                                                                                                                                                                                                                                                                                                                                                                                                                                                                                                                                                                                                                                                                                                                             |
| Article Type:                   | Original research                                                                                                                                                                                                                                                                                                                                                                                                                                                                                                                                                                                                                                                                                                                                                                                                                  |
| Date Submitted by the Author:   | 19-Oct-2023                                                                                                                                                                                                                                                                                                                                                                                                                                                                                                                                                                                                                                                                                                                                                                                                                        |
| Complete List of Authors:       | Terefa, Dufera; Wallaga University, Public Health<br>Tsefaye, Edosa; Wallaga University, Department of Public Health<br>Tolessa, Belachew; Wallaga University, Department of Public Health, Institute of Health Sciences<br>Desisa, Adisu; Wallaga University, Public Health<br>Olani, Wolkite ; Wallaga University, Public Health<br>Fetensa, Getahun; Wallaga University, Department of Nursing<br>Chego, Melese ; Wallaga University, Public Health<br>Abdisa, Eba ; Wallaga University, School of Nursing<br>Turi, Ebisa; Wallaga University, Department of Public Health<br>Bekuma, Tariku Tsefaye; Wallaga University, Department of Public health<br>Getachew, Motuma; Wallaga University, Public Health<br>Tsefaye, Lensa ; Wallaga University, Public Health<br>Tilahun, Temesgen; Wallaga University, School of Medicine |
| <b>Primary Subject Heading</b>: | Health policy                                                                                                                                                                                                                                                                                                                                                                                                                                                                                                                                                                                                                                                                                                                                                                                                                      |
| Secondary Subject Heading:      | Health economics, Health policy, Health services research, Infectious diseases, Public health                                                                                                                                                                                                                                                                                                                                                                                                                                                                                                                                                                                                                                                                                                                                      |
| Keywords:                       | Health Equity, Decision Making, EPIDEMIOLOGY, Health Services Accessibility, HEALTH SERVICES ADMINISTRATION & MANAGEMENT                                                                                                                                                                                                                                                                                                                                                                                                                                                                                                                                                                                                                                                                                                           |
|                                 |                                                                                                                                                                                                                                                                                                                                                                                                                                                                                                                                                                                                                                                                                                                                                                                                                                    |

SCHOLARONE™  
Manuscripts



I, the Submitting Author has the right to grant and does grant on behalf of all authors of the Work (as defined in the below author licence), an exclusive licence and/or a non-exclusive licence for contributions from authors who are: i) UK Crown employees; ii) where BMJ has agreed a CC-BY licence shall apply, and/or iii) in accordance with the terms applicable for US Federal Government officers or employees acting as part of their official duties; on a worldwide, perpetual, irrevocable, royalty-free basis to BMJ Publishing Group Ltd ("BMJ") its licensees and where the relevant Journal is co-owned by BMJ to the co-owners of the Journal, to publish the Work in this journal and any other BMJ products and to exploit all rights, as set out in our [licence](#).

The Submitting Author accepts and understands that any supply made under these terms is made by BMJ to the Submitting Author unless you are acting as an employee on behalf of your employer or a postgraduate student of an affiliated institution which is paying any applicable article publishing charge ("APC") for Open Access articles. Where the Submitting Author wishes to make the Work available on an Open Access basis (and intends to pay the relevant APC), the terms of reuse of such Open Access shall be governed by a Creative Commons licence – details of these licences and which [Creative Commons](#) licence will apply to this Work are set out in our licence referred to above.

Other than as permitted in any relevant BMJ Author's Self Archiving Policies, I confirm this Work has not been accepted for publication elsewhere, is not being considered for publication elsewhere and does not duplicate material already published. I confirm all authors consent to publication of this Work and authorise the granting of this licence.

1  
2  
3 1 Impact of the COVID-19 pandemic on the cost of chronic diseases treatment and  
4  
5 2 care at public hospitals in Wallaga zones, Oromia Regional State, Ethiopia: A  
6  
7 3 hospital-based, cross-sectional study  
8  
9

10 4 Dufera Rikitu Terefa <sup>1</sup>, Edosa Tesfaye <sup>1</sup>, Belachew Etana <sup>1</sup>, Adisu Ewunetu Desisa <sup>1</sup>,  
11  
12 5 Wolkite Olani <sup>1</sup>, Getahun Fetensa <sup>2</sup>, Melese Chego <sup>1</sup>, Eba Abdisa <sup>2</sup>, Ebisa Turi <sup>1</sup>,  
13  
14 6 Tariku Tesfaye Bekuma <sup>1</sup>, Motuma Getachew <sup>1</sup>, Lensa Tesfaye <sup>1</sup>, Temesgen Tilahun  
15  
16  
17 7 <sup>3</sup>

18  
19 8 <sup>1</sup> Department of Public Health, Institute of Health Sciences, Wallaga University,  
20  
21 9 Nekemte, Ethiopia

22  
23  
24 10 <sup>2</sup> School of Nursing, Institute of Health Sciences, Wallaga University, Nekemte,  
25  
26 11 Ethiopia

27  
28 12 <sup>3</sup> School of Medicine, Institute of Health Sciences, Wallaga University, Nekemte,  
29  
30 13 Ethiopia

31  
32  
33 14 Co-author contact details:

34  
35 15 Edosa Tesfaye, E-mail: edosatesfaye2019@yahoo.com

36  
37 16 Belachew Etana, E-mail: ba.etana@gmail.com

38  
39 17 Adisu Ewunetu, E-mail: adisuewunetu2019@gmail.com

40  
41 18 Wolkite Olani, E-mail: walkiteolani2020@gmail.com

42  
43 19 Getahun Fetensa, E-mail: fetensagetahun@gmail.com

44  
45 20 Melese Chego, E-mail: melese\_chego@yahoo.com

46  
47 21 Eba Abdisa, E-mail: ebaabdisa@rocketmail.com

48  
49 22 Ebisa Turi, E-mail: ebakoturi@gmail.com

50  
51 23 Tariku Tesfaye Bekuma, E-mail: tarii2007@gmail.com

52  
53 24 Motuma Getachew, E-mail: motyamo@gmail.com

54  
55 25 Lensa Tesfaye, E-mail: lenlove539@gmail.com

1  
2  
3 26 Temesgen Tilahun, E-mail: ttamuko@yahoo.com  
4

5 27 Corresponding author contact details:  
6

7 28 Full name: Dufera Rikitu Terefa  
8

9 29 P.O.Box=395, Wallaga University, Nekemte, Ethiopia.  
10

11 30 Tel. (+251)-922260706  
12

13 31 E-mail:duferarikitu24@gmail.com  
14  
15

## 16 32 **Abstract**

17  
18 33 **Objective:** Globally, around one third of the population has at least one long-term  
19  
20 34 health condition that could be affected by the COVID-19 pandemic. Despite the fact  
21  
22 35 that studies have revealed the direct impact of COVID-19 on health care provision  
23  
24 36 and utilization, the impact of the pandemic on the cost of chronic disease treatment  
25  
26 37 and care from a patient perspective was scanty. So, the study aimed to determine  
27  
28 38 the impact of the COVID-19 pandemic on cost of chronic diseases treatment and  
29  
30 39 care at public hospitals in Wallaga Zones, Oromia Regional State, Ethiopia, from  
31  
32 40 August 1 to 31, 2020.  
33  
34

35  
36 41 **Methods:** An institutional-based cross-sectional study design was used, and the  
37  
38 42 sample size for the study (n = 642) was determined using a single population mean  
39  
40 43 formula. Data was collected using interviews and analyzed using SPSS version 25.  
41  
42 44 Descriptive statistics were performed, and the cost of follow-up care before and after  
43  
44 45 the pandemic was compared using a related-samples Wilcoxon signed-rank test,  
45  
46 46 declaring the level of significance of the median cost difference at  $P < 0.05$ .  
47  
48  
49  
50

51  
52 47 **Results:** A total of 642 patients were included in the study, of whom 605 (94.2%)  
53  
54 48 responded to the interviews. There was a significant median cost difference (n = 593,  
55  
56 49  $Z = 5.05$ ,  $p = 0.001$ ) between the cost of chronic diseases among follow-up patients  
57  
58 50 during the pandemic and the costs incurred by these patients before the pandemic.  
59  
60



1  
2  
3 51 **Conclusion:** The cost of follow-up care among chronic disease patients during the  
4  
5 52 COVID-19 pandemic was significantly higher compared to before the pandemic era.  
6  
7 53 Therefore, healthcare providers should arrange special fee waiver mechanisms for  
8  
9 54 chronic disease healthcare costs during such types of pandemics and provide the  
10  
11 55 services at proximal health facilities.  
12  
13  
14

15 56 **Keywords:** COVID-19 Pandemic, Chronic Disease, Cost of Illness, Follow up care,  
16  
17 57 Ethiopia  
18  
19

### 20 58 **Strengths and Limitations of the Study**

- 21  
22 59 • A less costly and time-consuming retrospective costing approach was used.
- 23  
24 60 • The cost of illness analysis in this study was limited to the patients' perspective.
- 25  
26 61 • The study did not include the costs experienced by patients who were employed  
27  
28 62 before the pandemic but then lost their jobs.
- 29  
30 63 • Children less than 15 years of age and the elderly greater than 65 years of age  
31  
32 64 were not included in the valuation of lost work days in the cost estimation.
- 33  
34 65 • There might also be a recall bias.  
35  
36  
37  
38  
39

### 40 66 **Background**

41  
42 67 Chronic diseases (CDs) are the major public health problems that account for 60% of  
43  
44 68 all deaths (35% in low- and middle-income countries). [1-3] including Ethiopia, many  
45  
46 69 low and middle-income countries (LMICs) are undergoing a gradual epidemiologic  
47  
48 70 transition as the disease burden shifts from infectious to non-communicable  
49  
50 71 diseases (NCDs). [4–6] Healthcare systems in these countries are mostly  
51  
52 72 unprepared to handle the increasing burden of these diseases, resulting in no or  
53  
54 73 limited access to affordable prevention and diagnosis of NCDs. [7] These challenges  
55  
56  
57  
58  
59  
60

1  
2  
3 74 add up to higher NCD treatment costs, whose financing mostly comes from  
4  
5 75 households' out-of-pocket (OOP) spending. [8]  
6

7  
8 76 The COVID-19 pandemic was also another challenge that disrupted entire societies,  
9  
10 77 including the routine health care systems in Ethiopia. The comprehensive effort to  
11  
12 78 contain the pandemic and minimize the subsequent morbidity and mortality has  
13  
14 79 affected both the continuity and quality of care. [9] During the pandemic, most global  
15  
16 80 healthcare resources were focused on COVID-19 prevention and control. This  
17  
18 81 resource reallocation could disrupt the continuum of care for patients with CDs in this  
19  
20 82 era. Diabetes, chronic obstructive pulmonary disease, hypertension, heart disease,  
21  
22 83 asthma, cancer, and depression were some of the conditions reported to be most  
23  
24 84 impacted by the reduction in healthcare resources due to the pandemic. [10]  
25  
26 85 Resources at all levels have shifted away from CDs management and prevention  
27  
28 86 during the outbreak, and the lockdown of many services has translated into reduced  
29  
30 87 access, a decrease in referrals, and reduced hospitalizations of patients with non-  
31  
32 88 COVID-19 pathology. [11] As the pandemic continues to rapidly spread, attention  
33  
34 89 often focuses on the numbers of confirmed and probable cases, hospitalizations, and  
35  
36 90 deaths, which can be called the "direct" effects of the pandemic. However, these  
37  
38 91 numbers do not capture the full extent of the pandemic because it has also generated  
39  
40 92 important spillover (indirect) effects by decreasing the supply of and altering patient  
41  
42 93 demand for non-COVID-19-related medical care. [12]  
43  
44  
45  
46  
47  
48

49 94 In Ethiopia, the government declared a state of emergency, labeling the pandemic a  
50  
51 95 national threat and launching overall preventive measures, including advising the  
52  
53 96 community to stay at home, practicing strict and frequent hand washing, and wearing  
54  
55 97 a face mask. Also, it restricted the movement of its people from place to place and  
56  
57 98 laid temporary restrictions on market places, restaurants, shops, cinema houses,  
58  
59  
60

1  
2  
3 99 religious institutions, and cities. [13] During this time, the number of hospital visits  
4  
5  
6 100 dropped sharply to utilize health services, including CD follow-up. [14] Many studies  
7  
8 101 have revealed the direct impact of COVID-19 on health care provision and utilization.  
9  
10 102 But there has been little emphasis on the impact of the pandemic on the costs of  
11  
12 103 chronic disease follow-up care from a patient perspective. So, the study aimed to  
13  
14 104 determine the impact of the COVID-19 pandemic on the cost of follow-up care among  
15  
16 105 chronic disease patients at public hospitals.

## 106 **Methods and Materials**

### 107 **Study Design and Setting**

108 An institutional-based cross-sectional study design was used to conduct this study. It  
109 was conducted from August 1 to 31, 2020, in the three wallaga zones, namely, East  
110 Wallaga, West Wallaga, and Horro Guduru Wallaga zones, of Oromia Regional State,  
111 Ethiopia. These three Wallaga zones are among the twenty-one zones of the Oromia  
112 region and were found in the western direction of the region, Oromia. The capital  
113 towns of east Wallaga zone, Nekemte town; west Wallaga zone, Gimbi town; and  
114 Horro Guduru Wallaga zone, Shambu town, were located 333km, 441km, and 314km  
115 west of Addis Ababa, the capital city of Ethiopia, respectively.

### 116 **Study Participants**

117 All chronic disease patients who visited public hospitals in the Wallaga Zones were  
118 the source population, and all patients who visited the three Wallaga Zones' selected  
119 study hospitals during the study period were the study population.

### 120 **Inclusion and Exclusion Criteria**

121 All patients from the selected CDs in the study area who visited the study hospitals  
122 were included in the study. Patients whose age was less than 15 years old and

1  
2  
3 123 without accompanying parents who were seriously ill and unable to respond to the  
4  
5 124 interviews were excluded from the study.  
6  
7

### 8 125 **Sample Size and Sampling Methods**

9  
10 126 The sample size was determined by using the single population mean formula,  
11  
12 127 applying the following assumptions: two-sided alpha error ( $\epsilon$ ) set at 0.05, 95%  
13  
14 128 confidence level, mean cost of DM ( $\mu$ ) = 48.99 ETB, and standard deviation (SD) =  
15  
16  
17 129 30.89 ETB[15], adding a 5% non-response rate.  
18

19  
20 130 Using the formula,  $n = \frac{(z - \alpha/2)^2 * \sigma^2}{\epsilon^2 \mu^2}$  ..... [16],  $n = 642$ .  
21  
22

23 131 Among thirteen public hospitals in the study area, data was collected from the  
24  
25 132 selected CDs of follow-up care patients from Nekemte specialized hospitals, Sire  
26  
27 133 hospital, Gida hospital, Arjo hospital, Shambu hospital, Guduru hospital, Gimbi  
28  
29 134 hospital, and Nedjo hospital, which were selected using a simple random sampling  
30  
31  
32 135 technique.  
33

34 136 The determined sample size was allocated to each study hospital proportionally  
35  
36 137 based on the proportion of CD patients who attended follow-up care. Wallaga  
37  
38 138 University referral hospital was purposely excluded from the study, which was an  
39  
40 139 isolation and treatment center for COVID-19 during the study period, and four other  
41  
42  
43 140 hospitals were excluded due to their low CD patient flow.  
44  
45  
46  
47  
48  
49  
50  
51  
52  
53  
54  
55  
56  
57  
58  
59  
60

1  
2  
3 141 Finally, a simple random sampling technique was used from the registration book to  
4  
5 142 sample patients at each study hospital as per their proportion to select 642  
6  
7  
8 143 participants.

#### 10 144 **Data Collection**

12 145 The structured questionnaire was developed in English after reviewing relevant  
13  
14 146 literature, and it was translated into Afan Oromo. Data collection and supervision  
15  
16  
17 147 were carried out by eight data collectors, with four supervisors assigned. These data  
18  
19 148 collectors and supervisors were trained before the pre-test and actual data collection  
20  
21 149 started. The questionnaires were pre-tested in Bedele Hospital using 32 (5%) of the  
22  
23  
24 150 determined sample size. It was collected through a face-to-face interview. Patients  
25  
26 151 who completed their chronic outpatient services and returned to leave the study  
27  
28 152 hospitals were interviewed.

#### 30 153 **Study Variables**

32  
33 154 **Socio-demographic and economic characteristics, health service costs (non-**  
34  
35 155 **medical costs; transportation, food, accommodation, and income lost, and**  
36  
37 156 **medical costs; registration, consultation, laboratory, radiology, and drugs)**  
38  
39  
40 157 **were assessed and determined.**

#### 42 **Operational Definitions**

43  
44  
45 Before COVID-19: The period before March 13, 2020, when Ethiopia had the first  
46  
47 confirmed COVID-19 positive case.

48  
49 Chronic disease follow-up patients: A patient visited the study hospital for the  
50  
51 follow-up care of one of the following: hypertension (HTN), diabetes mellitus (DM),  
52  
53 heart failure (HF), mental illness, HIV (Human Immune Virus), stroke, epilepsy,  
54  
55 and asthma.

56  
57  
58 Chronic disease: any of the following illnesses that persist over time, can gradually  
59  
60

1  
2  
3  
4 progress, do not resolve spontaneously, and may not be cured: HTN, DM, HF,  
5  
6 mental illness, HIV, stroke, epilepsy, and asthma.[14]  
7

8 Direct costs: the expenditures in ETB spent by chronic disease patients and their  
9  
10 families on the diagnosis and treatment of chronic illness per prescription of  
11  
12 physicians in the study hospitals.  
13

14 During COVID-19: the period after March 13, 2020, when Ethiopia had the first  
15  
16 confirmed COVID-19 positive case.  
17

18 Indirect costs: the number of productive days lost by patients and their families as  
19  
20 a result of chronic illness treatment and care.  
21  
22

23 Medical cost: the cost component of chronic disease patients' follow-up visits at  
24  
25 study hospitals that includes registration, laboratory, radiology, and drug costs.  
26  
27

28 **Non-medical cost:** the cost component that includes transportation, food,  
29  
30 accommodation, and income lost among chronic disease patients during  
31  
32 follow-up visits at study hospitals.  
33  
34  
35

### 36 37 158 **Data Analysis**

38  
39 159 Data was entered into Epi-data version 3.1 and exported to SPSS version 25  
40  
41 160 software for analysis. Descriptive statistics were performed for all study variables  
42  
43 161 based on their characteristics. The bottom-up costing approach was used to  
44  
45 162 estimate the direct cost of the follow-up visit with respect to the patient's perspective,  
46  
47 163 and the indirect costs (income lost due to productive time lost) were estimated using  
48  
49 164 earnings lost both before and during the COVID-19 pandemic. [17] The time  
50  
51 165 foregone and productive time lost were converted into indirect costs based on the  
52  
53 166 daily wage rate and then multiplied by the number of working days lost. The daily  
54  
55 167 wage rate for patients was estimated by dividing their monthly income by 30 days for  
56  
57 168 both patients and caregivers. [17] All costs included in the analysis were measured in  
58  
59  
60

1  
2  
3 169 terms of Ethiopian Birr (ETB) and were converted to US\$(US dollar) during the  
4  
5 170 analysis, and the average currency exchange rate was (August 2020; 1 US\$ = 35.99  
6  
7 171 *ETB*). The cost data was converted to real terms by adjusting market prices to reflect  
8  
9 172 true costs using Ethiopian inflation data.

10  
11  
12 173 Finally, the normality distribution of treatment cost data was checked, and it was not  
13  
14 174 normally distributed. As a result, non-parametric tests were used to analyze the  
15  
16 175 median cost for each cost category, as well as a 2-paired sample Wilcoxon sign rank  
17  
18 176 test to compare the costs incurred before and during the pandemic lockdown, with  
19  
20 177 the level of significance of the median cost difference set at  $p < 0.05$ .

### 21 22 178 **Ethical consideration**

23  
24  
25 179 An appropriate research ethical approval was obtained from the ethical review board  
26  
27 180 of Wallaga University, Institute of Health Sciences (Reference number:  
28  
29 181 IRB/233/2020). The study was conducted in accordance with the Declaration of  
30  
31 182 Helsinki. The questionnaire was designed to be anonymous, and the result did not  
32  
33 183 identify the personalities of the respondents; rather, it was presented in the  
34  
35 184 aggregated statistics. Written consent was obtained from the study participants. The  
36  
37 185 data was kept in protected and safe locations. Paper-based data was kept in a  
38  
39 186 locked cabinet, and computer-based data was password-secured. Data sharing was  
40  
41 187 enacted based on the ethical and legal rules of data sharing, and it was not  
42  
43 188 accessed by a third party except the research teams.

### 44 45 189 **Patient and Public Involvement**

46  
47 190 None  
48  
49  
50  
51  
52  
53  
54  
55  
56  
57  
58  
59  
60

## 191 Results

### 192 Socio-demographic Characteristics

193 A total of 642 patients were included in the study, among whom 605 responded to  
 194 the interview, yielding a 94.2% response rate. An almost equal number of males and  
 195 females participated in the study. More than half of the participants, 352 (58.2%),  
 196 were from urban areas, and the majority of them, 421 (69.6%), were married.

197 Regarding the educational status of the participants, 137 (22.6%) were illiterates  
 198 (Table 1). The average participant's age was 43.29 (SD=16.5) years, the average  
 199 monthly income was 84.32 (SD=70.65) US dollars, and the average household size  
 200 was 4.46 (SD=3.43).

201 Table 1: Socio-demographic characteristics and classification of study participants by  
 202 chronic diseases conditions in the public hospitals of the three Wallaga zones,  
 203 Oromia National Regional State, Ethiopia 2020 (N= 605)

| Characteristics (N= 605) |           | Frequency (n) | Percentage (%) |
|--------------------------|-----------|---------------|----------------|
| Sex                      | Male      | 302           | 49.9           |
|                          | Female    | 303           | 50.1           |
| Residence place          | Urban     | 352           | 58.2           |
|                          | Rural     | 253           | 41.8           |
| Marital status           | Single    | 130           | 21.5           |
|                          | Married   | 421           | 69.6           |
|                          | Separated | 7             | 1.2            |
|                          | Divorced  | 2             | 0.3            |
|                          | Widowed   | 45            | 7.4            |
| Religion                 | Orthodox  | 165           | 27.3           |



|                           |                     |     |      |
|---------------------------|---------------------|-----|------|
|                           | Muslim              | 59  | 9.8  |
|                           | Protestant          | 373 | 61.7 |
|                           | Others              | 8   | 1.3  |
| Ethnic group              | Oromo               | 552 | 91.2 |
|                           | Amhara              | 48  | 7.9  |
|                           | Gurage              | 4   | 0.7  |
|                           | Tigre               | 1   | 0.2  |
| Educational status        | Illiterate          | 137 | 22.6 |
|                           | Read & Write        | 102 | 16.9 |
|                           | Grade 1-8           | 99  | 16.4 |
|                           | Grade 9-8           | 151 | 25.0 |
|                           | Diploma and above   | 116 | 19.2 |
| Employment status         | Government employee | 93  | 15.4 |
|                           | NGO* employee       | 89  | 14.7 |
|                           | Merchant            | 100 | 16.5 |
|                           | Housewife           | 114 | 18.8 |
|                           | Farmer              | 107 | 17.7 |
|                           | Others**            | 102 | 16.9 |
| Types of Chronic diseases | Hypertension        | 214 | 35.4 |
|                           | Diabetic mellitus   | 173 | 28.6 |
|                           | Heart failure       | 62  | 10.2 |
|                           | Mental disease      | 51  | 8.4  |
|                           | HIV/AIDS            | 50  | 8.3  |
|                           | Asthma              | 29  | 4.8  |

|  |          |    |     |
|--|----------|----|-----|
|  | Epilepsy | 18 | 3.0 |
|  | Stroke   | 3  | 0.5 |

204 \*NGO= non-governmental organization, \*\* Daily laborer, students

### 205 **The Overall Cost of CD Follow-up Care before and during the Pandemic**

206 The total cost for the treatment of CDs before the COVID-19 pandemic among  
 207 patients who incurred any one or more types of cost was on average 10.41 (SD =  
 208 10.19) US dollars, with the median cost of 9.76 (IQR = 8.64) US dollars among 600  
 209 patients before the pandemic. The total cost of the treatment of the diseases per  
 210 follow-up visit during the pandemic among 593 patients was 13.02 (SD = 11.22) US  
 211 dollars, and the median cost was 12.27 (IQR = 10.40) US dollars.

212 The median income lost due to productivity time lost for the treatment of CDs before  
 213 the pandemic was 1.48 (IQR = 2.71 US dollars) among the 501 participants who had  
 214 income, which was almost similar to the income lost when visiting the study hospitals  
 215 during the pandemic, which was 1.40 (IQR = 2.85 US dollars).

216 The total median non-medical cost incurred for the follow-up care was 6.05 (IQR =  
 217 5.55) US dollars before the pandemic among 463 patients and 7.98 (IQR = 7.50) US  
 218 dollars among the same number of patients during the pandemic.

219 The total median transportation cost to travel to hospitals and travel back to their  
 220 homes was 1.141 (IQR = 1.94) US dollars before the pandemic and 2.29 (IQR =  
 221 3.05) US dollars during the pandemic among the 430 patients who paid for  
 222 transportation.

223 The total median cost incurred for the accommodation and food during the follow-up  
 224 visit was 3.43 (IQR = 4.91) US dollars before the pandemic and 4.29 (IQR = 633) US  
 225 dollars during the pandemic among 199 participants.

226 The total median medical cost was 3.71 (IQR = 5.22) US dollars before the  
 227 pandemic, whereas it was 4.29 (IQR = 5.91) US dollars during the pandemic hospital  
 228 visit among the 425 participants who paid for the prescribed drugs (Table 2).

229 Table 2: The overall cost of chronic diseases follow-up treatment and care before and  
 230 during the pandemic among chronic diseases patients at public hospitals in the three  
 231 Wallaga zones, Oromia National Regional state, Ethiopia 2020(N= 605)

| Cost Categories                        | Era of COVID-19 Pandemic | Observation-on (N) | Mean(SD)     | Median (IQR) | Significance level of median cost difference (During-Before covid-19) |
|----------------------------------------|--------------------------|--------------------|--------------|--------------|-----------------------------------------------------------------------|
| (a) Income lost                        | Before                   | 501                | 2.27(2.75)   | 1.48(2.71)   | Z = 1.780,<br>p = 0.075                                               |
|                                        | During                   | 501                | 2.25(2.72)   | 1.40(2.85)   |                                                                       |
| (b) Transportation                     | Before                   | 430                | 1.91(2.13)   | 1.14(1.94)   | Z = 8.028,<br>p = 0.001                                               |
|                                        | During                   | 430                | 3.43(4.42)   | 2.29(3.05)   |                                                                       |
| (c) Food and accommodation             | Before                   | 199                | 4.67(5.05)   | 3.43(4.91)   | Z = 1.189,<br>p = 0.169                                               |
|                                        | During                   | 199                | 5.6(5.94)    | 4.29(6.33)   |                                                                       |
| Total nonmedical cost (a+b+c) = (d)    | Before                   | 463                | 4.58(5.35)   | 6.05(5.55)   | Z = 4.903,<br>p = 0.001                                               |
|                                        | During                   | 463                | 6.81(7.58)   | 7.98(7.50)   |                                                                       |
| Total medical cost (e)                 | Before                   | 425                | 5.51(8.43)   | 3.71(5.22)   | Z = 2.382,<br>p = 0.017                                               |
|                                        | During                   | 425                | 5.93(7.81)   | 4.29(5.91)   |                                                                       |
| Total cost per patient per visit (d+e) | Before                   | 600                | 10.41(10.19) | 9.76(8.64)   | Z = 5.05,<br>p=0.001                                                  |
|                                        | During                   | 593                | 13.02(11.22) | 12.27(10.40) |                                                                       |

232 Note: 1US\$ = 35.99 ETB, August, 2020; SD: Standard Deviation; IQR: Interquartile  
 233 Range

### 234 **Cost Difference Based on COVID-19 Pandemic**

235 There was a significant median cost difference (n = 593, Z = 5.05, p = 0.001)  
236 between the cost of follow-up care during the COVID-19 pandemic lockdown and the  
237 costs incurred before the pandemic (Table 3). This showed that 348 out of 593  
238 (58.7%) patients incurred significantly higher costs during the pandemic compared to  
239 before the pandemic. The median cost of follow-up care during the pandemic was  
240 12.27 (IQR = 10.40) US dollars, compared to 9.76 (IQR = 8.64) US dollars before the  
241 COVID-19 pandemic.

242 The study showed that there was no significant median difference in income lost  
243 among patients who had income during and before the pandemic (n = 501, Z =  
244 1.780, p = 0.075). The median income lost during the pandemic was 1.48 (IQR =  
245 2.71 US dollars) compared to the income lost before the pandemic, which was 1.40  
246 (IQR = 2.85 US dollars).

247 There was a significant median cost difference in non-medical costs per patient  
248 during and before the pandemic (n = 463, Z = 4.903, p = 0.001). This showed  
249 significantly higher costs were incurred by more than half of the patients, 276  
250 (59.61%), during the pandemic compared to before the pandemic. The median non-  
251 medical cost observed among the patients was 7.98 (IQR = 7.50) and 6.05 (IQR =  
252 5.55) US dollars per follow-up visit during and before the pandemic, respectively.

253 The study revealed that there was no statistical significance in the median cost  
254 difference of food and accommodation incurred during and before the pandemic (n =  
255 199, Z = 1.189, p = 0.169), and the median of this cost category was 4.29 (IQR =  
256 6.33) and 3.13 (IQR = 4.91) US dollars during and before the pandemic lock-down,  
257 respectively.

1  
2  
3 258 The majority of the patients, 289 (67.2%), paid higher transportation fees when they  
4  
5 259 visited hospitals during the pandemic compared to before the pandemic. There was  
6  
7  
8 260 a significant median cost difference in transportation costs during and before the  
9  
10 261 pandemic ( $n = 430$ ,  $Z = 8.028$ ,  $p = 0.00$ ), which was explained by the fact that the  
11  
12 262 median transportation cost was 1.14 (IQR = 1.94) US dollars and 2.29 (IQR = 3.05)  
13  
14 263 US dollars during and before the pandemic, respectively.

16  
17 264 More than half of the patients, 236 (55.5%), incurred higher costs for medical  
18  
19 265 services during the pandemic compared to before the pandemic. There was a  
20  
21 266 significant median cost difference during and before the pandemic ( $n = 425$ ,  $Z =$   
22  
23 267  $2.382$ ,  $p = 0.017$ ), in which the median cost was 4.29 (IQR = 5.91) and 3.71 (IQR =  
24  
25 268  $5.22$ ) US dollars during and before the pandemic lockdown.

26  
27  
28 269 The study showed that the majority of the hypertensive (HTN) patients, 128 (60.7%),  
29  
30 270 paid a high amount of money during the pandemic compared to before the pandemic  
31  
32 271 among the 211 patients who paid for the services. There was a significant median  
33  
34 272 cost difference per visit during and before the pandemic ( $n = 211$ ,  $Z = 3.632$ ,  $p =$   
35  
36 273  $0.00$ ). The median cost observed among these patients was 7.58 (IQR = 7.53) and  
37  
38 274  $10.14$  (IQR = 8.74) US per follow-up visit before and during the pandemic,  
39  
40 275 respectively.

41  
42  
43 276 More than half of diabetes mellitus (DM) patients (59.17%) paid higher costs for  
44  
45 277 services during the pandemic compared to before the pandemic. The total cost  
46  
47 278 incurred by these patients was significantly higher during the pandemic compared to  
48  
49 279 before the pandemic ( $n = 169$ ,  $Z = 3.095$ ,  $p = 0.002$ ). The median cost was 11.39  
50  
51 280 (IQR = 10.87) and 8.11 (IQR = 9.26) US dollars during and before the pandemic  
52  
53 281 lockdown, respectively.  
54  
55  
56  
57  
58  
59  
60

1  
2  
3 282 The study revealed that there was no statistical significance in the median difference  
4  
5 283 in total cost incurred by heart failure (HF) patients during and before the pandemic  
6  
7  
8 284 era (n = 61, Z = -0.055, p = 0.956). Among 61 HF patients, only 31 (50.82%) paid a  
9  
10 285 higher amount of money during the pandemic compared to before the pandemic.

11  
12 286 Similarly, there was no statistical significance in the median difference in total cost  
13  
14 287 incurred by patients who visited the hospitals for mental health follow-up for the  
15  
16  
17 288 treatment of diseases during and before the pandemic era (n = 41, Z = -1.497, p =  
18  
19 289 0.134). Among 41 patients, only 20 (40.82%) paid a higher amount of money during  
20  
21 290 the pandemic.

22  
23  
24 291 The study also showed that there was a statistically significant median difference in  
25  
26 292 total cost incurred by HIV patients during and before the pandemic lockdown (n = 49,  
27  
28 293 Z = 3.356, p = 0.00). Among 49 patients, the majority of them 34(69.39%) incurred a  
29  
30 294 higher cost per visit during the pandemic compared to before the pandemic  
31  
32 295 lockdown.

33  
34  
35 296 There was no statistical significance in the median difference in total cost incurred by  
36  
37 297 asthma patients during and before the pandemic era (n = 28, Z = 1.731, p = 0.184).

38  
39  
40 298 Similarly, there was no statistically significant median difference in total cost incurred  
41  
42 299 by epilepsy patients during and before the pandemic lockdown (n = 18, Z = 1.328, p  
43  
44 300 = 0.184) (Table 3).

45  
46  
47 301 Table 3: Cost of chronic diseases follow-up treatment and care by disease types  
48  
49 302 among chronic disease patients at public hospitals in the three Wallaga zones,  
50  
51 303 Oromia National Regional state, Ethiopia 2020(N= 605)

| Types of CDs   | Era of COVID-19 Pandemic | Observation (N) | Mean(SD)     | Median (IQR) | Significance level of median cost difference(During- Before covid-19) |
|----------------|--------------------------|-----------------|--------------|--------------|-----------------------------------------------------------------------|
| HTN            | Before                   | 211             | 10.03(11.86) | 7.58(7.53)   | $Z = 3.632,$<br>$p = 0.001$                                           |
|                | During                   | 211             | 12.65(10.42) | 10.14(8.74)  |                                                                       |
| DM             | Before                   | 169             | 10.64(8.42)  | 8.12(9.26)   | $Z = 3.095,$<br>$p = 0.002$                                           |
|                | During                   | 169             | 13.56(10.49) | 11.39(10.87) |                                                                       |
| HF             | Before                   | 61              | 12.64(12.85) | 9.06(8.53)   | $Z = -0.055,$<br>$p = 0.956$                                          |
|                | During                   | 61              | 12.51(11.34) | 8.2(12.52)   |                                                                       |
| Mental disease | Before                   | 49              | 13.08(8.97)  | 11.63(10.10) | $Z = -1.497,$<br>$p = 0.134$                                          |
|                | During                   | 49              | 10.91(8.45)  | 8.86(10.24)  |                                                                       |
| HIV            | Before                   | 49              | 7.37(6.65)   | 6.12(6.76)   | $Z = 3.356,$<br>$p = 0.000$                                           |
|                | During                   | 49              | 16.58(18.32) | 12.24(14.25) |                                                                       |
| Asthma         | Before                   | 28              | 8.95(6.40)   | 7.33(10.68)  | $Z = 1.731,$<br>$p = 0.184$                                           |
|                | During                   | 28              | 12.92(12.34) | 10.34(8.18)  |                                                                       |
| Epilepsy       | Before                   | 18              | 7.70(7.01)   | 5.70(11.18)  | $Z = 1.328,$<br>$p = 0.184$                                           |
|                | During                   | 18              | 10.44(5.74)  | 10.00(9.84)  |                                                                       |

Note: 1US\$ = 35.99 ETB, August, 2020; SD: Standard Deviation; IQR: Interquartile Range

## Discussion

This study was aimed at determining the impact of the COVID-19 pandemic on the cost of chronic disease treatment and care at public hospitals in Wallaga Zones,

1  
2  
3 309 Oromia Regional State, Ethiopia. The study found that the cost of follow-up  
4  
5 310 treatment and care among chronic disease patients during the COVID-19 pandemic  
6  
7  
8 311 was significantly higher compared to before the pandemic era.

9  
10 312 This indicated that more than half of the chronic patients, 58.7%, incurred a  
11  
12 313 significantly higher total cost during the pandemic lockdown compared to before the  
13  
14 314 pandemic. This finding supports the study's findings that chronic illness costs  
15  
16 315 account for more than 75% of total healthcare costs in high-income countries. [18,  
17  
18 316 19] However, this study was conducted during the COVID-19 pandemic and in a low-  
19  
20 317 income country, but these studies were not conducted at the time of the pandemic  
21  
22 318 and were also conducted in high-income countries. During the pandemic, most  
23  
24 319 global healthcare resources are focused on COVID-19, and this resource  
25  
26 320 reallocation could disrupt the continuum of care for patients with CDs. [9, 10, 20]  
27  
28 321 This could be explained by the fact that the global pandemic's disruption of the  
29  
30 322 health care system may impose additional costs on CD patients.

31  
32  
33 323 The study revealed that the non-medical cost during the follow-up visit per patient  
34  
35 324 during the era of COVID-19 was significantly higher than the cost incurred before the  
36  
37 325 pandemic era by the same patients, which was doubled during the pandemic. This  
38  
39 326 significant difference might be due to a strict lockdown that could affect these  
40  
41 327 patients adversely as they require regular follow-up visits that lead to further health  
42  
43 328 consequences and additional costs. [21,22]

44  
45 329 Transportation costs were one of the cost categories that doubled during the  
46  
47 330 pandemic compared to before the pandemic. The median cost per patient per visit of  
48  
49 331 this cost category during the pandemic era was significantly increased by two folds.  
50  
51 332 This could be due to the fact that the government restricted the movement of its  
52  
53  
54  
55  
56  
57  
58  
59  
60



1  
2  
3 333 people from place to place and laid a temporary restriction on public transport across  
4  
5 334 regions and cities. [13, 21]  
6  
7

8 335 The study discovered a significant median cost difference in medical costs, with the  
9  
10 336 median of this cost category increasing by 15.6% during the pandemic. This finding  
11  
12 337 is in line with the study report that revealed that before the pandemic, one in three  
13  
14 338 Americans did not take their medications as prescribed because of high costs, but  
15  
16 339 during a global pandemic, forgoing medications involves even more risks for chronic  
17  
18 340 care patients and incurs even higher costs in the long run. [23] However, comparing  
19  
20 341 study findings in this study setting with those in a high-resource setting is taken as a  
21  
22 342 weakness of this study.  
23  
24

25  
26 343 The study also evaluated the cost of each selected chronic disease. Accordingly, for  
27  
28 344 the follow-up care of HTN patients, the patients incurred significantly higher costs  
29  
30 345 during the pandemic compared to before the pandemic, which were raised by  
31  
32 346 33.76% during the pandemic. The cost incurred before the COVID pandemic was  
33  
34 347 almost comparable with other study reports, but the cost incurred during the  
35  
36 348 pandemic was higher than the study report on the cost of hypertension before the  
37  
38 349 COVID-19 lockdown in Ethiopia. [24]  
39  
40

41  
42 350 Again, the study showed that the cost of DM follow-up visits per patient during the  
43  
44 351 pandemic lockdown was significantly higher than the cost incurred before the  
45  
46 352 pandemic, which was increased by 40.53%. However, before and during the COVID-  
47  
48 353 19 lockdown, the cost of DM in this study was lower than the study reported in  
49  
50 354 Ethiopia. [15, 25] This variation could be attributed to differences in DM  
51  
52 355 complications and treatment among study participants.  
53  
54

55  
56 356 Despite HIV care and treatment being an exempt service in Ethiopia, patients  
57  
58 357 incurred nonmedical costs. The study revealed that the cost incurred by HIV patients  
59  
60

1  
2  
3 358 for follow-up treatment and care per visit per patient during the pandemic lockdown  
4  
5 359 was significantly higher than the cost incurred before the pandemic, which was  
6  
7  
8 360 increased by twofold. The cost of HIV treatment and care reported in the study was  
9  
10 361 higher than in other Ethiopian studies. [26, 27]

11  
12 362 However, there was no significant statistical median cost difference for the follow-up  
13  
14 363 care of heart failure, mental illness, asthma, and epilepsy during and before the  
15  
16 364 pandemic; a slight median cost difference was observed during and before the  
17  
18  
19 365 pandemic.

## 21 366 **Conclusion**

22  
23  
24 367 This study revealed that the total cost of follow-up care among chronic disease  
25  
26 368 patients during the COVID-19 pandemic lockdown was significantly higher compared  
27  
28 369 to before the pandemic era among the same patients. In this study, hypertensive  
29  
30 370 patients had the greatest impact on the cost of ongoing care as a result of the  
31  
32 371 COVID-19 pandemic. A comprehensive package of chronic disease treatment and  
33  
34 372 care is demanded at different levels of health facilities in the country's health system.  
35  
36 373 Therefore, healthcare providers, hospital administrators, and the local government  
37  
38 374 should arrange special fee waiver mechanisms for chronic disease healthcare costs  
39  
40 375 during such types of pandemics and provide the services at proximal health facilities.  
41  
42  
43  
44

## 45 376 **Declarations**

## 46 377 **Author's Contribution Statement**

47  
48  
49 378 All authors made substantial contributions to conception and design, acquisition of  
50  
51 379 data, or analysis and interpretation of data; took part in drafting the article or revising  
52  
53 380 it critically for important intellectual content; gave final approval of the version to be  
54  
55 381 published; and agreed to be accountable for all aspects of the work.  
56  
57  
58

## 59 382 **Conflict of Interest Statement**

1  
2  
3 383 All authors declared that they have no conflicts of interest related to this work.  
4

5 384 **Consent for Publication**

6  
7  
8 385 NA  
9

10 386 **Availability of Data and Materials**

11  
12 387 All the data supporting the study's findings are within the manuscript. Additional  
13  
14 388 detailed information and raw data will be shared upon request addressed to the  
15  
16 389 corresponding author.  
17  
18

19 390 **Funding**

20  
21 391 This research received no specific grant from any funding agency in the public,  
22  
23 392 commercial, or not-for-profit sectors.  
24  
25

26 393 **Acknowledgments**

27  
28 394 Researchers would like to acknowledge all participants in the study and respective  
29  
30 395 administrative bodies from top to bottom for their due cooperation and involvement.  
31  
32

33 396 **Acronyms**

34  
35 397 ETB: Ethiopian Birr, HF: Heart Failure, HIV: Human Immune Virus, HTN:  
36  
37 398 Hypertension, LMICs: Low-and-middle-income countries, NCDs: Non-communicable  
38  
39 399 diseases, OOP: Out-of-pocket, WHO: World Health Organization  
40  
41

42 400 **References**

43  
44 401 [1]. World Health Organization. A guide to implementation research in the prevention  
45  
46 402 and control of Non-communicable diseases. Geneva; Switzerland World Health  
47  
48 403 Organization; 2016.

49  
50  
51 404 [2].World Health Organization. Overview preventing chronic diseases: a vital  
52  
53 405 investment. Switzerland: 2004.

54  
55 406 [3].The World Bank. Human Development Network. The growing danger of non-  
56  
57 407 communicable diseases. Acting now to reverse course; 2011.  
58  
59  
60

- 1  
2  
3 408 [4].Santosa, A, Byass, P. Diverse empirical evidence on epidemiological transition in  
4  
5 409 low-and middle-income countries: population-based findings from INDEPTH network  
6  
7 410 data. PLoS One 2016; 11, e0155753.  
8  
9  
10 411 [5].World Health Organization. The double burden: Emerging epidemics and  
11  
12 412 persistent problems. World Health Report; 1999.  
13  
14 413 [6].Murray, C. J., Lopez, A. D. The global burden of disease: a comprehensive  
15  
16 414 assessment of mortality and disability from diseases, injuries, and risk factors in  
17  
18 415 1990 and projected to 2020: summary. Harvard School of Public Health on behalf of  
19  
20 416 the World Health Organization and the World Bank; 1996.  
21  
22  
23 417 [7].Bollyky, T. J., Templin, T., Cohen, M., et al. Lower-income countries that face the  
24  
25 418 most rapid shift in non-communicable disease burden are also the least prepared.  
26  
27 419 Health Aff. 2017: 36, 1866–1875.  
28  
29  
30 420 [8].Engelgau MM, El-Saharty S, Kudesia P, et al. Capitalizing on the demographic  
31  
32 421 transition: tackling non-communicable diseases in South Asia: The World Bank;  
33  
34 422 2011.  
35  
36  
37 423 [9].World Health Organization. Information note on COVID-19 and non-  
38  
39 424 communicable diseases. Available at: [https://www.who.int/publications/m/item/  
40  
41 425 covid-19-and-ncds](https://www.who.int/publications/m/item/covid-19-and-ncds) Accessed on July 21, 2020.  
42  
43  
44 426 [10].Yogini V, Clare L, Francesco Z, et al. Impact of COVID-19 on routine care for  
45  
46 427 chronic diseases: A global survey of views from healthcare professionals; 2020.  
47  
48  
49 428 [11].Fagan M. Huge fall in non-Covid hospital admissions and attendances. Irish  
50  
51 429 Examiner; 2020.  
52  
53  
54 430 [12].Julian C, Rebecca McG. Spillover Effects of the COVID-19 Pandemic Could  
55  
56 431 Drive Long-Term Health Consequences for Non-COVID-19 Patients. Health Affairs;  
57  
58 432 2020.  
59  
60

- 1  
2  
3 433 [13].Strategic Partnership for International Health Regulations and Health Security  
4  
5 434 school of public health: COVID-19 Preparedness Bulletin Ethiopia; 2020. Available  
6  
7 435 at: <https://extranet.who.int/sph/news/covid-19-preparedness-bulletin-ethiopia>.  
8  
9  
10 436 [14].Tamirat MA, Workeabeba A, Alemayehu W, et al. The Impact of COVID-19 on  
11  
12 437 Care Seeking Behavior of Patients at Tertiary Care Follow-up Clinics: A Cross-  
13  
14 438 Sectional Telephone Survey. Addis Ababa, Ethiopia; 2020. medRxiv preprint doi:  
15  
16 439 <https://doi.org/10.1101/2020.11.25.20236224>; 2020.  
17  
18  
19 440 [15].Alemu Z, Workneh BD, Mohammed SA, et al. Economic Assessment of Direct  
20  
21 441 Cost of Illness of Diabetes Mellitus at Dessie Referral Hospital, North East  
22  
23 442 Ethiopia.2020. Int J Diabetes Clin Res 7:122. doi.org/10.23937/2377-3634/1410122  
24  
25  
26 443 [16].Stanley L, David W. Hosmer Jr, et al. Adequacy of Sample Size in Health  
27  
28 444 Studies. World Health Organization. 1990; pp36-39.  
29  
30  
31 445 [17].Abhijit P. Health Economic Evaluation Methods Techniques. IOSR Journal of  
32  
33 446 Economics and Finance (IOSR-JEF). 2016; 7:1-9.  
34  
35 447 [18].Glynn LG., Valderas JM., Healy P., et al. The prevalence of multimorbidity in  
36  
37 448 primary care and its effect on health care utilization and cost. J of Family Pract.  
38  
39 449 2011; 28:516–23.  
40  
41  
42 450 [19].Nuno R., Coleman K., Bengoa R., et al. Integrated care for chronic conditions:  
43  
44 451 the contribution of the ICCC Framework. Health Policy 2012; 105:55–64.  
45  
46  
47 452 [20].Baird B. How has general practice responded to the Covid-19 (coronavirus)  
48  
49 453 outbreak? The `Kings Fund. Available at:[https://www.kingsfund.org.uk/blog/2020/](https://www.kingsfund.org.uk/blog/2020/04/covid-19-general-practice)  
50  
51 454 [04/covid-19-general-practice](https://www.kingsfund.org.uk/blog/2020/04/covid-19-general-practice). Accessed on June 25, 2020.  
52  
53  
54 455 [21].Finet P, Le Bouquin Jeannes R, Dameron O, et al. Review of current  
55  
56 456 telemedicine applications for chronic diseases. Toward a more integrated system?  
57  
58 457 Irbm 2015;36.  
59  
60

- 1  
2  
3 458 [22].French J.A., Brodie M.J., Caraballo R., et al. Keeping people with epilepsy safe  
4  
5 459 during the Covid-19 pandemic. *Neurology*. 2020; 94:1032–1037. doi:  
6  
7 460 10.1212/WNL.00000000000009632.  
8  
9  
10 461 [23].Valenz. The Effects of COVID-19 on Chronic Disease Management and Five  
11  
12 462 Solutions Insurers Should Embrace; 2020.  
13  
14 463 [24].Zawudie AB, Lemma TD, Daka DW. Cost of Hypertension Illness and  
15  
16 464 Associated Factors among Patients Attending Hospitals in Southwest Shewa Zone,  
17  
18 465 Oromia Regional State, Ethiopia. *ClinicoEconomics and Outcomes Research*  
19  
20 466 2020:12 201–211.  
21  
22  
23  
24 467• [25].Samson O, Amarech G, Mulugeta T, et al. economic burden of diabetes mellitus  
25  
26 468 to diabetic patients and their families attending health facilities in Addis ababa.2020.  
27  
28 469 *Ethiopian Medical Journal* 58(3).  
29  
30  
31 470• [26].Berman, P; Alebachew, A; Mann, C; Agarwal, A; Abdella, E. 2016. Costs of  
32  
33 471 Publicly Funded Primary Hospitals, Departments, and Exempted Services in Ethiopia  
34  
35 472 Supplement to Paper 1 with expanded sample of primary hospitals. Harvard T.H.  
36  
37 473 Chan School of Public Health; Breakthrough International Consultancy, PLC: Boston,  
38  
39 474 Massachusetts and Addis Ababa, Ethiopia.  
40  
41  
42 475• [27].Asfaw DB, Degu J, Bjarne R, et al. Cost estimates of HIV care and treatment  
43  
44 476 with and without anti-retroviral therapy at Arba Minch Hospital in southern Ethiopia.  
45  
46 477 Cost Effectiveness and Resource Allocation 2009, 7:6 doi:10.1186/1478-7547-7-6.  
47  
48  
49  
50  
51  
52  
53  
54  
55  
56  
57  
58  
59  
60

**STROBE 2007 (v4) Statement—Checklist of items that should be included in reports of *cross-sectional studies***

| Section/Topic                | Item # | Recommendation                                                                                                                                                                       | Reported on page # |
|------------------------------|--------|--------------------------------------------------------------------------------------------------------------------------------------------------------------------------------------|--------------------|
| <b>Title and abstract</b>    | 1      | (a) Indicate the study's design with a commonly used term in the title or the abstract                                                                                               | 1                  |
|                              |        | (b) Provide in the abstract an informative and balanced summary of what was done and what was found                                                                                  | 2                  |
| <b>Introduction</b>          |        |                                                                                                                                                                                      |                    |
| Background/rationale         | 2      | Explain the scientific background and rationale for the investigation being reported                                                                                                 | 3-4                |
| Objectives                   | 3      | State specific objectives, including any prespecified hypotheses                                                                                                                     | 2                  |
| <b>Methods</b>               |        |                                                                                                                                                                                      |                    |
| Study design                 | 4      | Present key elements of study design early in the paper                                                                                                                              | 5                  |
| Setting                      | 5      | Describe the setting, locations, and relevant dates, including periods of recruitment, exposure, follow-up, and data collection                                                      | 5                  |
| Participants                 | 6      | (a) Give the eligibility criteria, and the sources and methods of selection of participants                                                                                          | 6                  |
| Variables                    | 7      | Clearly define all outcomes, exposures, predictors, potential confounders, and effect modifiers. Give diagnostic criteria, if applicable                                             | 7                  |
| Data sources/<br>measurement | 8*     | For each variable of interest, give sources of data and details of methods of assessment (measurement). Describe comparability of assessment methods if there is more than one group | -                  |
| Bias                         | 9      | Describe any efforts to address potential sources of bias                                                                                                                            | -                  |
| Study size                   | 10     | Explain how the study size was arrived at                                                                                                                                            | 6                  |
| Quantitative variables       | 11     | Explain how quantitative variables were handled in the analyses. If applicable, describe which groupings were chosen and why                                                         | 8                  |
| Statistical methods          | 12     | (a) Describe all statistical methods, including those used to control for confounding                                                                                                | 8                  |
|                              |        | (b) Describe any methods used to examine subgroups and interactions                                                                                                                  | -                  |
|                              |        | (c) Explain how missing data were addressed                                                                                                                                          | 8                  |
|                              |        | (d) If applicable, describe analytical methods taking account of sampling strategy                                                                                                   | -                  |
|                              |        | (e) Describe any sensitivity analyses                                                                                                                                                | -                  |
| <b>Results</b>               |        |                                                                                                                                                                                      |                    |

|                          |     |                                                                                                                                                                                                                                                                                                                                                                                                               |       |
|--------------------------|-----|---------------------------------------------------------------------------------------------------------------------------------------------------------------------------------------------------------------------------------------------------------------------------------------------------------------------------------------------------------------------------------------------------------------|-------|
| Participants             | 13* | (a) Report numbers of individuals at each stage of study—eg numbers potentially eligible, examined for eligibility, confirmed eligible, included in the study, completing follow-up, and analysed<br>(b) Give reasons for non-participation at each stage<br>(c) Consider use of a flow diagram                                                                                                               | -     |
| Descriptive data         | 14* | (a) Give characteristics of study participants (eg demographic, clinical, social) and information on exposures and potential confounders<br>(b) Indicate number of participants with missing data for each variable of interest                                                                                                                                                                               | 8     |
| Outcome data             | 15* | Report numbers of outcome events or summary measures                                                                                                                                                                                                                                                                                                                                                          | -     |
| Main results             | 16  | (a) Give unadjusted estimates and, if applicable, confounder-adjusted estimates and their precision (eg, 95% confidence interval). Make clear which confounders were adjusted for and why they were included<br>(b) Report category boundaries when continuous variables were categorized<br>(c) If relevant, consider translating estimates of relative risk into absolute risk for a meaningful time period | -     |
| Other analyses           | 17  | Report other analyses done—eg analyses of subgroups and interactions, and sensitivity analyses                                                                                                                                                                                                                                                                                                                | -     |
| <b>Discussion</b>        |     |                                                                                                                                                                                                                                                                                                                                                                                                               |       |
| Key results              | 18  | Summarise key results with reference to study objectives                                                                                                                                                                                                                                                                                                                                                      | 12-14 |
| Limitations              | 19  | Discuss limitations of the study, taking into account sources of potential bias or imprecision. Discuss both direction and magnitude of any potential bias                                                                                                                                                                                                                                                    | 15    |
| Interpretation           | 20  | Give a cautious overall interpretation of results considering objectives, limitations, multiplicity of analyses, results from similar studies, and other relevant evidence                                                                                                                                                                                                                                    | -     |
| Generalisability         | 21  | Discuss the generalisability (external validity) of the study results                                                                                                                                                                                                                                                                                                                                         | -     |
| <b>Other information</b> |     |                                                                                                                                                                                                                                                                                                                                                                                                               |       |
| Funding                  | 22  | Give the source of funding and the role of the funders for the present study and, if applicable, for the original study on which the present article is based                                                                                                                                                                                                                                                 | 16    |

\*Give information separately for cases and controls in case-control studies and, if applicable, for exposed and unexposed groups in cohort and cross-sectional studies.

**Note:** An Explanation and Elaboration article discusses each checklist item and gives methodological background and published examples of transparent reporting. The STROBE checklist is best used in conjunction with this article (freely available on the Web sites of PLoS Medicine at <http://www.plosmedicine.org/>, Annals of Internal Medicine at <http://www.annals.org/>, and Epidemiology at <http://www.epidem.com/>). Information on the STROBE Initiative is available at [www.strobe-statement.org](http://www.strobe-statement.org).
